# Supplementary material for: Rh(iii)-Catalyzed intramolecular redox-neutral cyclization of alkenes via C–H activation
Source: Royal Society of Chemistry journal article supplement (doi:10.1039/c4cc00029c), 2014-01-01

**Rh(III)-Catalyzed Intramolecular Redox-Neutral Cyclization of Alkenes via C-H  
Activation†  
(Supporting Information)**

Zhuangzhi Shi, Mélissa Boultadakis-Arapinis, Dennis C. Köster, and Frank Glorius\*

Westfälische Wilhelms-Universität Münster, Organisch-Chemisches Institut,

Corrensstrasse 40, 48149 Münster, Germany

E-mail: glorius@uni-muenster.de

**CONTENTS:**

|                                                                               |     |
|-------------------------------------------------------------------------------|-----|
| 1. General informations.....                                                  | S1  |
| 2. Experimental procedures and characterization of substrates .....           | S2  |
| 3. Experimental procedures and characterization of products .....             | S10 |
| 4. References .....                                                           | S19 |
| 5. <sup>1</sup> H NMR and <sup>13</sup> C NMR spectra of those compounds..... | S20 |

**1. General Information.**

All reactions were carried out in flame-dried reaction vessels with Teflon screw caps under argon. All new compounds were fully characterized. NMR-spectra were recorded on a Bruker ARX-300, AV-300, AV-400 MHz or on a Varian Associated, Varian 600 unity plus. ESI mass spectra were recorded on a Bruker Daltonics MicroTof. [Cp\*RhCl<sub>2</sub>]<sub>2</sub>, CsOPiv were purchased from Sigma-Aldrich. Unless otherwise noted, materials obtained from commercial suppliers were used without further purification. The configuration of compounds **2d** and **2f** were determined by NOE.

## 2. Experimental Procedures and Characterization of Substrates

**1a-1f** were generated according to the following route:

Route A:

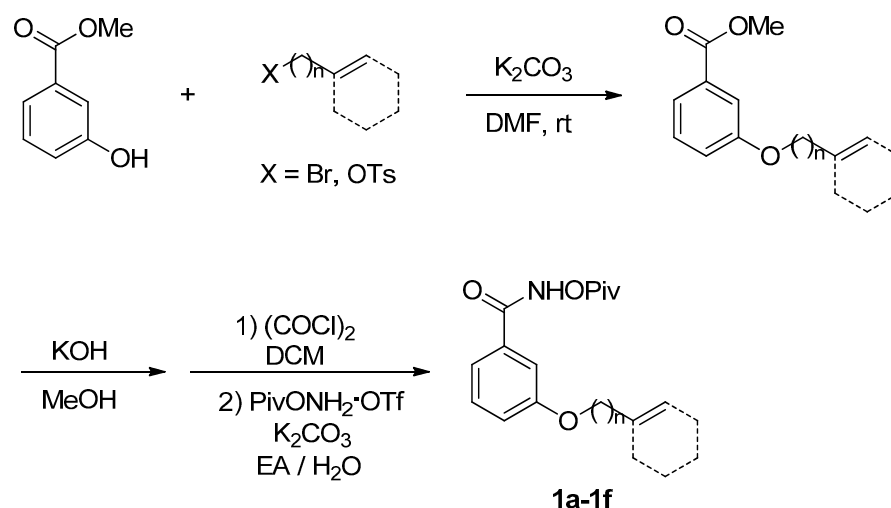

### 3-(Allyloxy)-*N*-(pivaloyloxy)benzamide (**1a**)

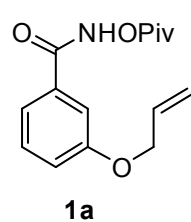

To a solution of 3-(allyloxy)benzoic acid<sup>1</sup> (891 mg, 5.00 mmol, 1.00 eq) in dry  $\text{CH}_2\text{Cl}_2$  (17 mL) was added oxalylchloride (515  $\mu\text{L}$ , 6.00 mmol, 1.20 eq) at 0 °C under Argon followed by the addition of a catalytic amount of DMF (2 drops). The reaction was stirred for 4 h at rt. The solvent was removed under reduced pressure to afford the crude acid chloride, which was directly engaged in the next step.

*O*-pivaloylhydroxamine (1.60 g, 6.00 mmol, 1.20 eq) was added to a biphasic mixture of  $\text{Na}_2\text{CO}_3$  (1.06 g, 10.0 mmol, 2.00 eq) in EtOAc (33 mL) and  $\text{H}_2\text{O}$  (17 mL). The mixture was cooled to 0 °C, whereupon the unpurified acid chloride was added dropwise as a solution in EtOAc (5 mL). The reaction was allowed to reach rt overnight. After the separation of the organic layer, the aqueous layer was extracted with EtOAc (2 x 50 mL). The combined organic layers were dried over  $\text{MgSO}_4$ , filtered and concentrated. The crude material was purified by column chromatography on silica (Pentane:EtOAc, 5:1) to afford 1.27 g (92%) of **1a** as a white solid: <sup>1</sup>H NMR (300 MHz,  $\text{CDCl}_3$ )  $\delta$  = 9.43 (brs, 1 H), 7.31 – 7.20 (m, 3 H), 7.03 (dt,  $J$  = 6.8, 2.4 Hz, 1 H), 6.08 – 5.87 (m, 1 H), 5.39 – 5.31 (m, 1 H), 5.26 – 5.21 (m, 1 H), 4.49 (dt,  $J$  = 5.3,

1.5 Hz, 2 H), 1.29 (s, 9 H).  $^{13}\text{C}$  NMR (75 MHz,  $\text{CDCl}_3$ )  $\delta$  = 176.95, 166.47, 158.77, 132.61, 132.06, 129.80, 119.76, 119.45, 118.01, 113.21, 68.87, 38.42, 26.99. **HRMS**  $m/z$  (ESI) calcd for  $\text{C}_{15}\text{H}_{19}\text{NO}_4\text{Na}$  ( $M + \text{Na}$ ) $^+$  300.1212, found 300.1209.

### 3,5-Bis(allyloxy)-*N*-(pivaloyloxy)benzamide (**1b**)

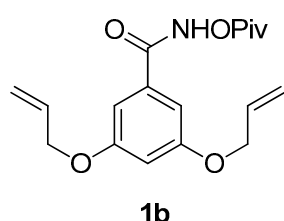

According to the route A, **1b** was synthesized as a white solid:  $^1\text{H}$  NMR (300 MHz,  $\text{CDCl}_3$ )  $\delta$  = 9.38 (brs, 1 H), 6.93 (d,  $J$  = 2.3 Hz, 2 H), 6.65 (t,  $J$  = 2.3 Hz, 1 H), 6.11 – 5.93 (m, 2 H), 5.47 – 5.35 (m, 2 H), 5.33 – 5.24 (m, 2 H), 4.52 (dt,  $J$  = 5.3, 1.4 Hz, 4 H), 1.35 (s, 9 H).  $^{13}\text{C}$  NMR (75 MHz,  $\text{CDCl}_3$ )  $\delta$  = 176.95, 166.39, 159.84, 132.65, 132.57, 118.06, 106.35, 106.08, 69.04, 38.43, 27.00. **ATR-FTIR** ( $\text{cm}^{-1}$ ): **HRMS**  $m/z$  (ESI) calcd for  $\text{C}_{18}\text{H}_{23}\text{NO}_5\text{Na}$  ( $M + \text{Na}$ ) $^+$  356.1468, found 356.1456.

### 3-((2-Methylallyl)oxy)-*N*-(pivaloyloxy)benzamide (**1c**)

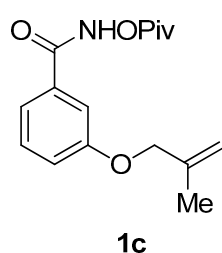

According to the route A, **1c** was synthesized as a white solid:  $^1\text{H}$  NMR (300 MHz,  $\text{CDCl}_3$ )  $\delta$  = 9.58 (brs, 1 H), 7.47 – 7.28 (m, 3 H), 7.18 – 7.04 (m, 1 H), 5.08 (s, 1 H), 4.99 (s, 1 H), 4.44 (s, 2 H), 1.81 (s, 3 H), 1.34 (s, 9 H).  $^{13}\text{C}$  NMR (101 MHz,  $\text{CDCl}_3$ )  $\delta$  = 177.00, 166.47, 158.93, 140.25, 132.04, 129.76, 119.70, 119.44, 113.34, 113.00, 71.78, 38.42, 26.98, 19.32. **HRMS**  $m/z$  (ESI) calcd for  $\text{C}_{16}\text{H}_{21}\text{NO}_4\text{Na}$  ( $M + \text{Na}$ ) $^+$  314.1363, found 314.1367.

### 3-(cinnamyloxy)-*N*-(pivaloyloxy)benzamide (**1d**)

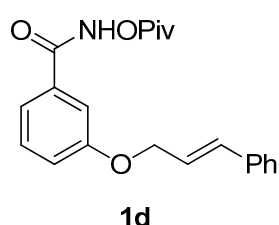

According to the route A, **1d** was synthesized as a white solid:  $^1\text{H}$  NMR (300 MHz,  $\text{CDCl}_3$ )  $\delta$  9.46 (brs, 1 H), 7.40 – 7.13 (m, 8 H), 7.05 (dt,  $J$  = 7.3, 2.2 Hz, 1 H), 6.64 (d,  $J$  = 16.0 Hz, 1 H), 6.30 (dt,  $J$  = 16.0, 5.8 Hz, 1 H), 4.76 – 4.51 (m, 2 H), 1.27 (s, 9 H).  $^{13}\text{C}$  NMR (75 MHz,  $\text{CDCl}_3$ )  $\delta$  176.92, 166.44, 158.81, 136.19, 133.38, 132.10, 129.85, 128.55, 127.96, 126.56, 123.65, 119.76, 119.51, 113.25, 68.73, 38.41, 26.98. **HRMS**  $m/z$  (ESI) calcd for  $\text{C}_{21}\text{H}_{23}\text{NO}_4\text{Na}$  ( $M + \text{Na}$ ) $^+$  376.1525, found 376.1519.

### 3-(But-3-en-1-yloxy)-*N*-(pivaloyloxy)benzamide (**1e**)

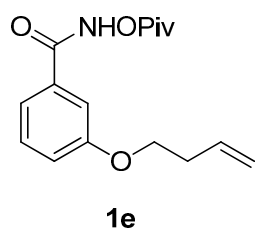

According to the route A, **1e** was synthesized as a white solid:

**<sup>1</sup>H NMR** (300 MHz, CDCl<sub>3</sub>)  $\delta$  = 9.35 (brs, 1 H), 7.36 – 7.32 (m, 3 H), 7.12 – 7.06 (m, 1 H), 6.02 – 5.76 (m, 1 H), 5.26 – 5.01 (m, 2 H), 4.04 (t,  $J$  = 6.7 Hz, 2 H), 2.59 – 2.51 (m, 2 H), 1.36 (s, 9 H).

**<sup>13</sup>C NMR** (75 MHz, CDCl<sub>3</sub>)  $\delta$  = 177.00, 166.60, 159.18, 134.10,

132.11, 129.83, 119.62, 119.31, 117.23, 113.07, 67.41, 38.45, 33.47, 27.01. **HRMS**  $m/z$  (ESI) calcd for C<sub>16</sub>H<sub>21</sub>NO<sub>4</sub>Na (M + Na)<sup>+</sup> 314.1363, found 314.1363.

### 3-(Cyclohex-2-en-1-ylmethoxy)-*N*-(pivaloyloxy)benzamide (**1f**)

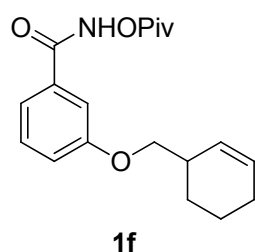

According to the route A, **1f** was synthesized as a white solid:

**<sup>1</sup>H NMR** (400 MHz, CDCl<sub>3</sub>)  $\delta$  = 9.46 (brs, 1 H), 7.38 – 7.27 (m, 3 H), 7.09 – 7.06 (m, 1 H), 5.85 – 5.78 (m, 1 H), 5.68 – 5.64 (m, 1 H), 3.93 – 3.76 (m, 2 H), 2.68 – 2.54 (m, 1 H), 2.07 – 1.99 (m, 2 H), 1.93 – 1.82 (m, 1 H), 1.75 – 1.72 (m, 1 H), 1.65 – 1.52 (m,

1 H), 1.52 – 1.39 (m, 1 H), 1.35 (s, 9 H). **<sup>13</sup>C NMR** (101 MHz, CDCl<sub>3</sub>)  $\delta$  = 176.96, 166.59, 159.40, 132.05, 129.76, 129.43, 127.17, 119.57, 119.20, 113.04, 72.05, 38.42, 35.26, 26.99, 25.70, 25.23, 20.64. **HRMS**  $m/z$  (ESI) calcd for C<sub>19</sub>H<sub>25</sub>NO<sub>4</sub>Na (M + Na)<sup>+</sup> 354.1676, found 354.1674.

**1g** was generated according to the following route:

Route B:

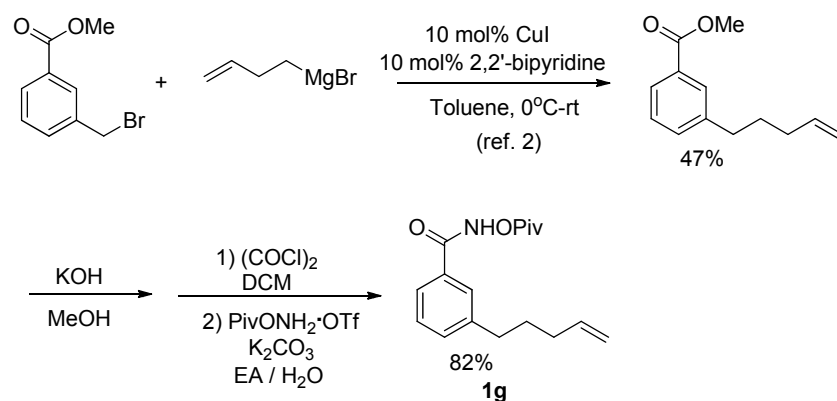

### 3-(Pent-4-en-1-yl)-*N*-(pivaloyloxy)benzamide (**1g**)

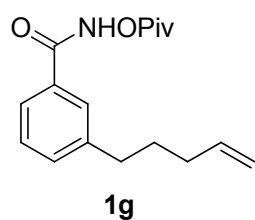

According to the route B, **1g** was synthesized as a white solid:  $^1\text{H}$  NMR (300 MHz,  $\text{CDCl}_3$ )  $\delta$  9.34 (brs, 1H), 7.72 – 7.51 (m, 2H), 7.36 (d,  $J$  = 5.8 Hz, 2H), 5.91 – 5.71 (m, 1H), 5.16 – 4.88 (m, 2H), 2.72 – 2.60 (m, 2H), 2.17 – 1.97 (m, 2H), 1.72 (p,  $J$  = 7.5 Hz, 2H), 1.36 (s, 9H).  $^{13}\text{C}$  NMR (75 MHz,  $\text{CDCl}_3$ )  $\delta$  177.06, 167.00, 143.33, 138.18, 132.91, 130.85, 128.72, 127.54, 124.73, 115.01, 38.44, 35.02, 33.13, 30.35, 27.01. **HRMS**  $m/z$  (ESI) calcd for  $\text{C}_{17}\text{H}_{23}\text{NO}_3\text{Na}$  ( $\text{M} + \text{Na}$ ) $^+$  312.1576, found 312.1570.

**1h** was generated according to the following route:

Route C:

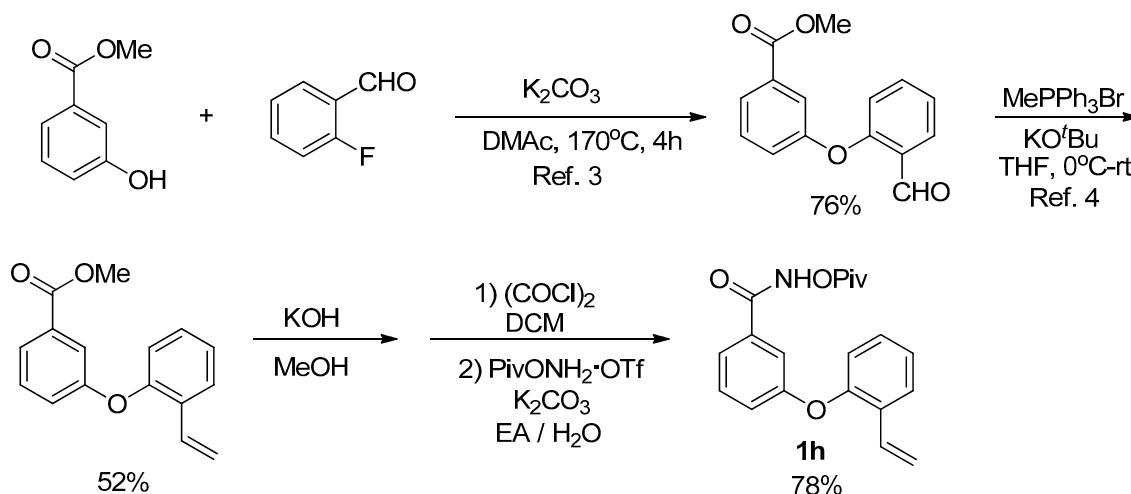

#### *N*-(Pivaloyloxy)-3-(2-vinylphenoxy)benzamide (**1h**)

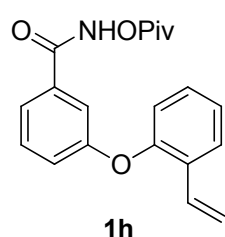

According to the route C, **1g** was synthesized as a white solid:  $^1\text{H}$  NMR (400 MHz,  $\text{CDCl}_3$ )  $\delta$  9.22 (brs, 1H), 7.55 (dd,  $J$  = 7.7, 1.7 Hz, 1H), 7.40 (dt,  $J$  = 7.7, 1.1 Hz, 1H), 7.35 – 7.26 (m, 2H), 7.13 – 7.02 (m, 2H), 6.89 – 6.78 (m, 2H), 5.72 (ddd,  $J$  = 17.7, 4.0, 1.2 Hz, 1H), 5.20 (dd,  $J$  = 11.1, 1.2 Hz, 1H), 1.28 (s, 9H).  $^{13}\text{C}$  NMR (101 MHz,  $\text{CDCl}_3$ )  $\delta$  176.93, 158.49, 152.50, 132.50, 130.53, 130.22, 129.26, 126.86, 124.92, 121.55, 121.23, 120.63, 116.19, 115.93, 38.43, 26.99. **HRMS**  $m/z$  (ESI) calcd for  $\text{C}_{20}\text{H}_{21}\text{NO}_4\text{Na}$  ( $\text{M} + \text{Na}$ ) $^+$  362.1368, found 362.1363.

**1i** was generated according to the following route:

Route D:

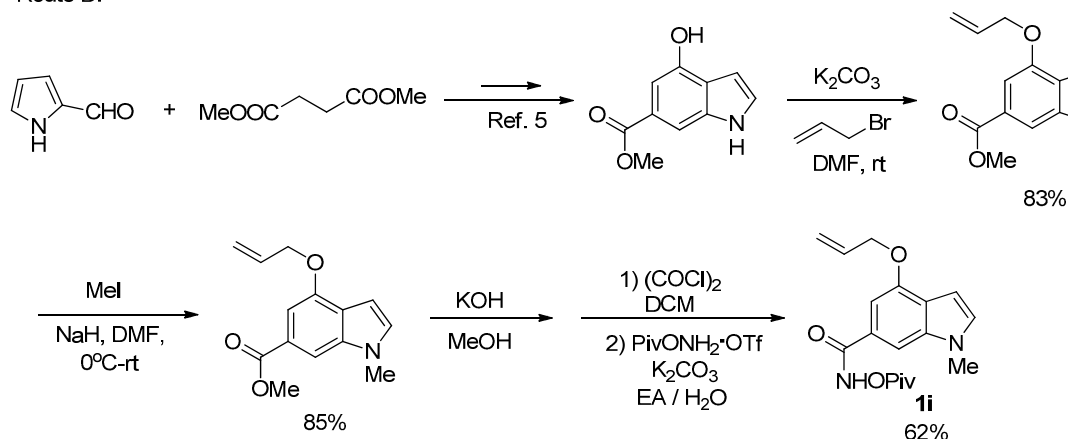

#### 4-(Allyloxy)-1-methyl-*N*-(pivaloyloxy)-1*H*-indole-6-carboxamide (**1i**)

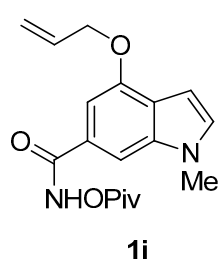

According to the route D, **1i** was synthesized as a white solid:  $^1\text{H}$  NMR (300 MHz,  $\text{CDCl}_3$ )  $\delta$  9.53 (brs, 1H), 7.48 (s, 1H), 7.07 (d,  $J$  = 3.0 Hz, 1H), 6.91 (s, 1H), 6.65 – 6.58 (m, 1H), 6.17 – 6.06 (m, 1H), 5.47 (dd,  $J$  = 17.3, 1.5 Hz, 1H), 5.31 (dd,  $J$  = 10.5, 1.3 Hz, 1H), 4.68 (d,  $J$  = 5.2 Hz, 2H), 3.80 – 3.73 (m, 3H), 1.38 (s, 9H).

$^{13}\text{C}$  NMR (75 MHz,  $\text{CDCl}_3$ )  $\delta$  177.44, 168.24, 152.11, 137.17, 133.15, 130.24, 124.48, 122.74, 117.53, 103.46, 99.04, 99.01, 68.89, 38.47, 33.15, 27.05. HRMS  $m/z$  (ESI) calcd for  $\text{C}_{18}\text{H}_{22}\text{N}_2\text{O}_4\text{Na}$  ( $M + \text{Na}$ ) $^+$  353.1477, found 353.1472.

**1j** was generated according to the following route:

Route E:

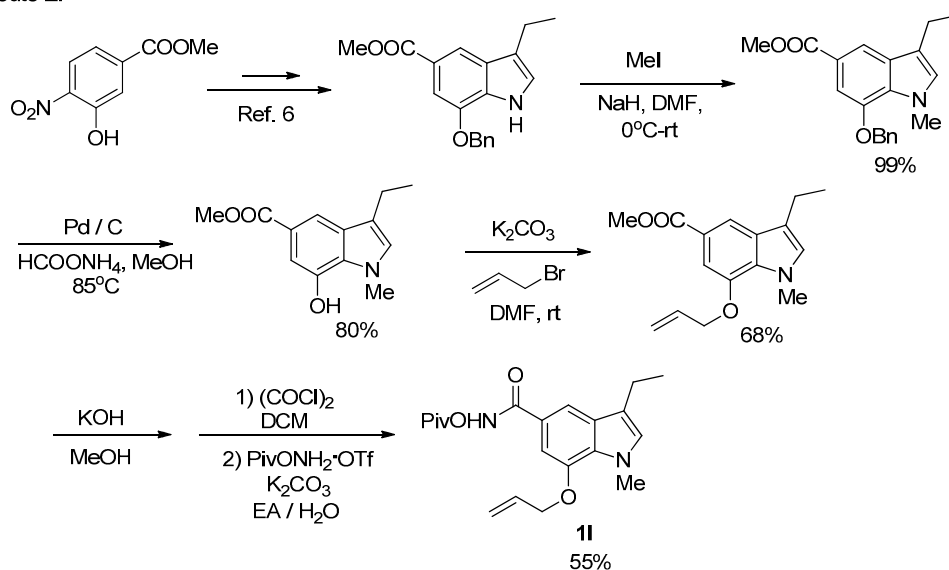

### 7-(Allyloxy)-3-ethyl-1-methyl-N-(pivaloyloxy)-1H-indole-5-carboxamide (**1j**)

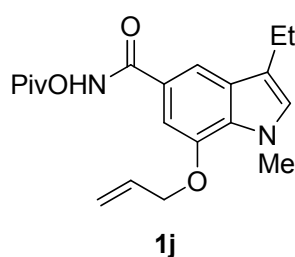

According to the route E, **1j** was synthesized as a white solid:

$^1\text{H}$  NMR (400 MHz,  $\text{CDCl}_3$ )  $\delta$  9.45 (brs, 1H), 7.68 (d,  $J = 1.4$  Hz, 1H), 7.08 (d,  $J = 1.2$  Hz, 1H), 6.75 (brs, 1H), 6.10 (ddt,  $J = 17.2, 10.5, 5.2$  Hz, 1H), 5.44 (dq,  $J = 17.3, 1.6$  Hz, 1H), 5.30 (dq,  $J = 10.6, 1.3$  Hz, 1H), 4.65 (dt,  $J = 5.2, 1.4$  Hz, 2H),

4.02 (s, 3H), 2.71 (qd,  $J = 7.5, 0.8$  Hz, 2H), 1.38 (s, 9H), 1.29 (t,  $J = 7.5$  Hz, 3H).  $^{13}\text{C}$  NMR (101 MHz,  $\text{CDCl}_3$ )  $\delta$  177.41, 168.45, 146.49, 132.95, 129.32, 129.07, 127.92, 121.51, 118.85, 117.54, 112.59, 102.38, 69.19, 38.44, 36.28, 27.05, 18.00, 14.55.

HRMS  $m/z$  (ESI) calcd for  $\text{C}_{20}\text{H}_{26}\text{N}_2\text{O}_4\text{Na}$  ( $M + \text{Na}$ ) $^+$  381.1790, found 381.1785.

**1k-l** were generated according to the following route:

Route F:

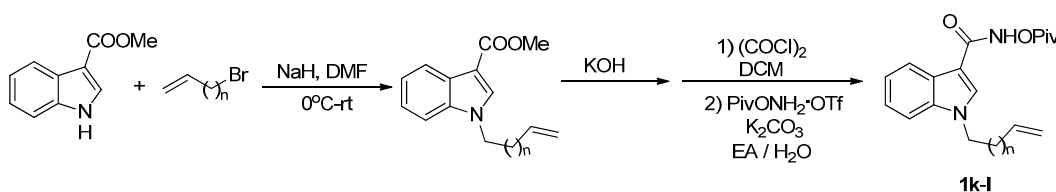

### 1-(but-3-en-1-yl)-N-(pivaloyloxy)-1H-indole-3-carboxamide (**1k**)

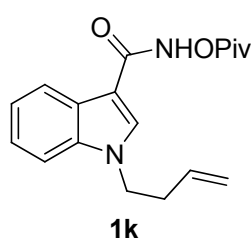

According to the route F, **1k** was synthesized as a white solid:

$^1\text{H}$  NMR (300 MHz,  $\text{CDCl}_3$ )  $\delta$  8.69 (brs, 1H), 7.58 – 7.49 (m, 1H), 6.91 – 6.70 (m, 4H), 5.30 – 5.13 (m, 1H), 4.61 – 4.48 (m, 2H), 3.67 (t,  $J = 7.1$  Hz, 2H), 2.08 (q,  $J = 7.0$  Hz, 2H), 0.87 (s, 9H).  $^{13}\text{C}$  NMR (151 MHz,  $\text{cdcl}_3$ )  $\delta$  167.32, 159.05, 135.82, 128.91, 121.90, 121.66, 121.13, 121.03, 110.56, 99.36, 49.46, 47.90, 35.57, 31.93.

HRMS  $m/z$  (ESI) calcd for  $\text{C}_{18}\text{H}_{22}\text{N}_2\text{O}_3\text{Na}$  ( $M + \text{Na}$ ) $^+$  337.1528, found 337.1523

### 1-(pent-4-en-1-yl)-N-(pivaloyloxy)-1H-indole-3-carboxamide (**1l**)

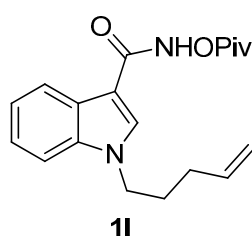

According to the route F, **1l** was synthesized as a white solid:  $^1\text{H}$  NMR (300 MHz,  $\text{CDCl}_3$ )  $\delta$  8.74 (brs, 1H), 7.54 (dt,  $J = 6.0, 2.4$

Hz, 1H), 6.89 – 6.65 (m, 4H), 5.25 (ddd,  $J = 17.5, 6.3, 3.4$  Hz, 1H), 4.60 – 4.48 (m, 2H), 3.64 – 3.52 (m, 2H), 1.55 (q,  $J = 6.6$  Hz, 2H), 1.43 (q,  $J = 7.0$  Hz, 2H), 0.86 (s, 9H).  $^{13}\text{C}$  NMR (75 MHz,  $\text{CDCl}_3$ )  $\delta$  177.65, 165.64, 136.67, 136.38, 132.43, 125.60, 122.91, 122.01, 121.15, 116.12, 110.23, 106.69, 46.14, 38.45, 30.58, 28.68, 27.08. HRMS  $m/z$  (ESI) calcd for  $\text{C}_{19}\text{H}_{24}\text{N}_2\text{O}_3\text{Na}$  ( $M + \text{Na}$ ) $^+$  351.1685, found 351.1679.

**3a, 3b & 3e** were generated according to the following route:

Route G:

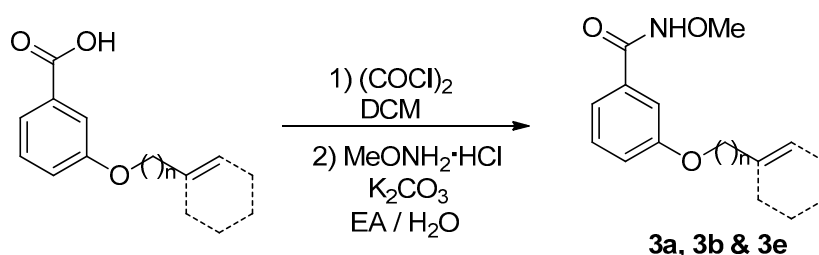

### 3-(Allyloxy)-*N*-methoxybenzamide (**3a**)

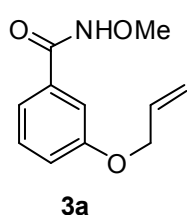

To a solution of 3-(allyloxy)benzoic acid (4.45 g, 25.0 mmol, 1.0 eq) in dry  $\text{CH}_2\text{Cl}_2$  (60 mL) was added oxalylchloride (2.6 mL, 30.0 mmol, 1.2 eq) at 0 °C under Argon followed by the addition of a catalytic amount of DMF (2 drops). The reaction was stirred for 4 h at rt. The solvent was removed under reduced pressure to afford the crude acid chloride, which was directly engaged in the next step.

Methoxylamine hydrochloride (2.3 g 27.5 mmol, 1.10 eq) was added to a biphasic mixture of  $\text{K}_2\text{CO}_3$  (6.9 g, 50.0 mmol, 2.00 eq) in EtOAc (80 mL) and  $\text{H}_2\text{O}$  (40 mL). The mixture was cooled to 0 °C, whereupon the unpurified acid chloride was added dropwise as a solution in EtOAc (5 mL). The reaction was allowed to reach rt overnight. After the separation of the organic layer, the aqueous layer was extracted with EtOAc (3 x 100 mL). The combined organic layers were dried over  $\text{MgSO}_4$ , filtered and concentrated. The crude material was purified by column chromatography on silica (Pentane:EtOAc, 1:1) to afford 4.95 g (96%) of **3a** as a white solid:  $^1\text{H}$  NMR (400 MHz,  $\text{CDCl}_3$ )  $\delta$  9.20 (brs, 1H), 7.39 – 7.18 (m, 3H), 7.10 – 6.97 (m, 1H), 6.22 – 5.83 (m, 1H), 5.34 (dd,  $J = 46.0, 13.9$  Hz, 2H), 4.54 (d,  $J = 4.3$



Hz, 2H), 3.85 (s, 3H).  $^{13}\text{C}$  NMR (101 MHz,  $\text{CDCl}_3$ )  $\delta$  166.24, 158.73, 133.08, 132.68, 129.67, 119.02, 118.95, 117.92, 113.06, 68.85, 64.44. **HRMS**  $m/z$  (ESI) calcd for  $\text{C}_{11}\text{H}_{13}\text{NO}_3\text{Na}$  ( $M + \text{Na}$ ) $^+$  230.0793, found 230.0788.

### 3,5-Bis(allyloxy)-*N*-methoxybenzamide (**3b**)

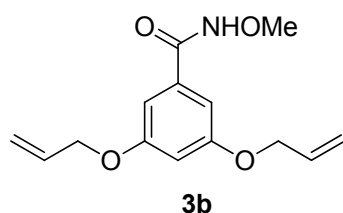

According to the route G, **3b** was synthesized as a white solid:  $^1\text{H}$  NMR (400 MHz,  $\text{CDCl}_3$ )  $\delta$  9.05 (brs, 1H), 6.87 (d,  $J = 2.3$  Hz, 2H), 6.61 (t,  $J = 2.3$  Hz, 1H), 6.01 (ddt,  $J = 17.2, 10.5, 5.3$  Hz, 2H), 5.39 (dq,  $J = 17.3, 1.6$  Hz, 2H), 5.28 (dq,  $J = 10.5, 1.3$  Hz, 2H), 4.51 (dt,  $J = 5.3, 1.5$  Hz, 4H), 3.85 (s, 3H).  $^{13}\text{C}$  NMR (101 MHz,  $\text{CDCl}_3$ )  $\delta$  159.78, 132.62, 117.98, 105.73, 105.54, 69.00, 64.46. **HRMS**  $m/z$  (ESI) calcd for  $\text{C}_{14}\text{H}_{17}\text{NO}_4\text{Na}$  ( $M + \text{Na}$ ) $^+$  286.1055, found 286.1050.

### 3-(But-3-en-1-yloxy)-*N*-methoxybenzamide (**3e**)

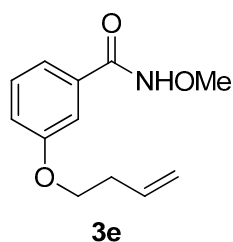

According to the route G, **3e** was synthesized as a white solid:  $^1\text{H}$  NMR (400 MHz,  $\text{CDCl}_3$ )  $\delta$  8.89 (brs, 1H), 7.38 – 7.21 (m, 3H), 7.08 – 7.00 (m, 1H), 5.89 (ddt,  $J = 17.0, 10.2, 6.7$  Hz, 1H), 5.24 – 5.07 (m, 2H), 4.04 (t,  $J = 6.7$  Hz, 2H), 3.87 (s, 3H), 2.54 (qt,  $J = 6.6, 1.3$  Hz, 2H).  $^{13}\text{C}$  NMR (101 MHz,  $\text{CDCl}_3$ )  $\delta$  159.14, 134.16, 129.71, 118.80, 118.76, 117.20, 112.90, 67.38, 64.48, 33.49. **HRMS**  $m/z$  (ESI) calcd for  $\text{C}_{12}\text{H}_{15}\text{NO}_3\text{Na}$  ( $M + \text{Na}$ ) $^+$  244.0950, found 244.0944.

### 3. Experimental Procedures and Characterization of Products

#### 3,4-Dihydro-2*H*-furo[4,3,2-*de*]isoquinolin-5(2*aH*)-one (2a)

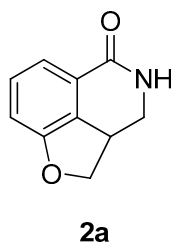

To a 10 mL Schlenk tube was added 3-(allyloxy)-*N*-(pivaloyloxy)benzamide (**1a**) (55.0 mg, 0.20 mmol), [Cp\*RhCl<sub>2</sub>]<sub>2</sub> (3.1 mg, 2.5 mol %), CsOPiv (94.0 mg, 0.20 mmol) and the tube was purged with Ar for three times, followed by addition of CH<sub>3</sub>CN (4.0 mL). The formed mixture was stirred at room temperature under Ar for 12 h as monitored by TLC. The solution was then removed under vacuum directly. The crude material was subjected to column chromatography on silica (Pent:EtOAc, 2:1) and afforded 25.0 mg (72%) of **2a** as a white solid: <sup>1</sup>H NMR (300 MHz, CDCl<sub>3</sub>) δ = 7.40 (dd, *J* = 7.7, 0.6 Hz, 1 H), 7.29 (dt, *J* = 7.7, 0.6 Hz, 1 H), 6.97 (t, *J* = 7.9 Hz, 1 H), 6.90 (brs, 1 H), 4.92 (t, *J* = 8.7 Hz, 1 H), 4.28 – 4.22 (m, 1 H), 4.07 – 3.88 (m, 1 H), 3.85 – 3.73 (m, 1 H), 3.61 – 3.52 (m, 1 H). <sup>13</sup>C NMR (75 MHz, CDCl<sub>3</sub>) δ = 166.12, 157.80, 132.00, 129.45, 126.19, 117.60, 112.82, 77.03, 45.79, 36.13. HRMS *m/z* (ESI) calcd for C<sub>10</sub>H<sub>9</sub>NO<sub>2</sub>Na (M + Na)<sup>+</sup> 198.0525, found 198.0530.

#### 7-(Allyloxy)-3,4-dihydro-2*H*-furo[4,3,2-*de*]isoquinolin-5(2*aH*)-one (2b)

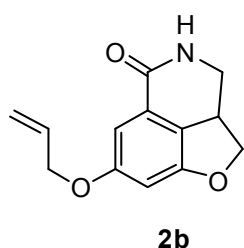

The reaction of **1b** (67.0 mg, 0.20 mmol, 1.00 eq), [Cp\*RhCl<sub>2</sub>]<sub>2</sub> (3.1 mg, 0.005 mmol, 2.5 mol%) and CsOPiv (94.0 mg, 0.40 mmol, 2.00 eq) in acetonitrile (4.0 mL) at rt under Ar was finished by the addition of 1 M NaOH. The phases were separated, the organic layer was extracted with EtOAc (3 x 20 mL), dried over MgSO<sub>4</sub>, filtered and concentrated. The crude material was subjected to column chromatography on silica (Pent:EtOAc, 2:1) and afforded 40 mg (87%) of **2b** as a white solid: <sup>1</sup>H NMR (300 MHz, CDCl<sub>3</sub>) δ = 6.88 (d, *J* = 1.9 Hz, 1 H), 6.55 (d, *J* = 1.9 Hz, 1 H), 6.52 (brs, 1 H), 6.10 – 5.95 (m, 1 H), 5.44 – 5.35 (m, 1 H), 5.31 – 5.24 (m, 1 H), 4.86 (t, *J* = 8.7 Hz, 1 H), 4.56 – 4.49 (m, 2 H), 4.24 – 4.18 (m, 1 H), 3.99 – 3.78 (m, 1 H), 3.74 – 3.67 (m, 1 H), 3.53 – 3.45 (m, 1 H). <sup>13</sup>C NMR (75 MHz, CDCl<sub>3</sub>) δ =

166.02, 160.85, 158.87, 132.81, 125.77, 124.89, 117.83, 102.18, 102.04, 77.73, 69.50, 46.18, 35.49. **HRMS**  $m/z$  (ESI) calcd for  $C_{13}H_{13}NO_3Na$  ( $M + Na$ )<sup>+</sup> 354.0788, found 354.0792.

#### 7-(Allyloxy)-3,4-dihydro-2*H*-furo[4,3,2-*de*]isoquinolin-5(2*aH*)-one (**2b**)

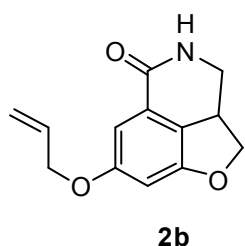

The reaction of **1b** (67.0 mg, 0.20 mmol, 1.00 eq), [Cp<sup>\*</sup>RhCl<sub>2</sub>]<sub>2</sub> (3.1 mg, 0.005 mmol, 2.5 mol%) and CsOPiv (94.0 mg, 0.40 mmol, 2.00 eq) in acetonitrile (4.0 mL) at rt under Ar was finished by the addition of 1 M NaOH. The phases were separated, the organic layer was extracted with EtOAc (3 x 20 mL), dried over MgSO<sub>4</sub>, filtered and concentrated. The crude material was subjected to column chromatography on silica (Pent:EtOAc, 2:1) and afforded 40 mg (87%) of **2b** as a white solid: <sup>1</sup>H NMR (300 MHz, CDCl<sub>3</sub>) δ = 6.88 (d, *J* = 1.9 Hz, 1 H), 6.55 (d, *J* = 1.9 Hz, 1 H), 6.52 (brs, 1 H), 6.10 – 5.95 (m, 1 H), 5.44 – 5.35 (m, 1 H), 5.31 – 5.24 (m, 1 H), 4.86 (t, *J* = 8.7 Hz, 1 H), 4.56 – 4.49 (m, 2 H), 4.24 – 4.18 (m, 1 H), 3.99 – 3.78 (m, 1 H), 3.74 – 3.67 (m, 1 H), 3.53 – 3.45 (m, 1 H). <sup>13</sup>C NMR (75 MHz, CDCl<sub>3</sub>) δ = 166.02, 160.85, 158.87, 132.81, 125.77, 124.89, 117.83, 102.18, 102.04, 77.73, 69.50, 46.18, 35.49. **HRMS**  $m/z$  (ESI) calcd for  $C_{13}H_{13}NO_3Na$  ( $M + Na$ )<sup>+</sup> 354.0788, found 354.0792.

#### 2a-Methyl-3,4-dihydro-2*H*-furo[4,3,2-*de*]isoquinolin-5(2*aH*)-one (**2c**)

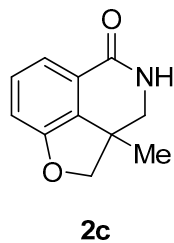

The reaction of **1c** (58 mg, 0.20 mmol, 1.00 eq), [Cp<sup>\*</sup>RhCl<sub>2</sub>]<sub>2</sub> (6.2 mg, 0.01 mmol, 5.0 mol%) and CsOPiv (93.6 mg, 0.40 mmol, 2.00 eq) in acetonitrile (2.0 mL) at rt under Ar was finished by the addition of 1 M NaOH. The phases were separated, the organic layer was extracted with EtOAc (3 x 20 mL), dried over MgSO<sub>4</sub>, filtered and concentrated. The crude material was subjected to column chromatography on silica (Pent:EtOAc, 2:1) and afforded 31 mg (81%) of **2c** as a white solid: <sup>1</sup>H NMR (300 MHz, CDCl<sub>3</sub>) δ = 7.35 (dd, *J* = 7.7, 0.7 Hz, 1 H), 7.23 (t, *J* = 7.8 Hz, 1 H), 7.13 (brs, 1 H), 6.92 (dd, *J* = 7.9, 0.6 Hz, 1 H), 4.51 (d, *J* = 8.5 Hz, 1 H), 4.28 (d, *J* = 8.6 Hz, 1 H), 3.70 (d, *J* = 11.9

Hz, 1 H), 3.50 (dd,  $J = 11.8, 5.0$  Hz, 1 H), 1.47 (s, 3 H).  $^{13}\text{C}$  NMR (101 MHz,  $\text{CDCl}_3$ )  $\delta = 165.63, 157.12, 136.62, 129.35, 125.34, 117.72, 113.07, 84.11, 51.38, 39.58, 22.42$ . HRMS  $m/z$  (ESI) calcd for  $\text{C}_{11}\text{H}_{11}\text{NO}_2\text{Na}$  ( $M + \text{Na}$ ) $^+$  212.0682, found 212.0687.

### 3-Phenyl-3,4-dihydro-2H-furo[4,3,2-de]isoquinolin-5(2aH)-one (2d)

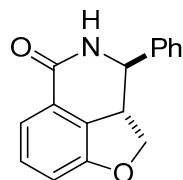

**2d**

The reaction of **1d** (36 mg, 0.10 mmol),  $[\text{Cp}^*\text{RhCl}_2]_2$  (1.6 mg, 2.5 mol %) and CsOPiv (47 mg, 2.0 equiv) in MeCN (2.0 mL) at room temperature under Ar led to full conversion of the starting material after 12 hours. The residue was then purified by silica gel chromatography (pentane / ethyl acetate 1.5:1) affording 22.0 mg (88%) of **2d** as white solid:  $^1\text{H}$  NMR (600 MHz,  $\text{CDCl}_3$ )  $\delta$  7.45 – 7.39 (m, 6H), 7.29 (td,  $J = 7.8, 0.9$  Hz, 1H), 6.95 (d,  $J = 8.0$  Hz, 1H), 5.73 (s, 1H), 4.76 (d,  $J = 11.9$  Hz, 1H), 4.66 (t,  $J = 9.0$  Hz, 1H), 4.28 (dd,  $J = 11.3, 9.0$  Hz, 1H), 4.03 – 3.98 (m, 1H).  $^{13}\text{C}$  NMR (151 MHz,  $\text{CDCl}_3$ )  $\delta$  166.1, 158.2, 138.8, 131.4, 129.8, 129.6, 129.4, 126.6, 118.1, 113.3, 76.5, 63.3, 44.6. HRMS  $m/z$  (ESI) calcd for  $\text{C}_{16}\text{H}_{13}\text{NO}_2\text{Na}$  ( $M + \text{Na}$ ) $^+$  274.0838, found 274.0846.

### 3,3a,4,5-tetrahydropyrano[4,3,2-de]isoquinolin-6(2H)-one (2e)

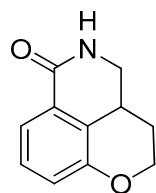

**2e**

The reaction of **1e** (58 mg, 0.20 mmol, 1.00 eq),  $[\text{Cp}^*\text{RhCl}_2]_2$  (3.1 mg, 0.005 mmol, 2.5 mol%) and CsOPiv (93.6 mg, 0.40 mmol, 2.00 eq) in acetonitrile (2.0 mL) at rt under Ar was finished by the addition of 1 M NaOH. The phases were separated, the organic layer was extracted with EtOAc (3 x 20 mL), dried over  $\text{MgSO}_4$ , filtered and concentrated. The crude material was subjected to column chromatography on silica (Pent:EtOAc, 2:1) and afforded 29 mg (77%) of **2e** as a white solid:  $^1\text{H}$  NMR (300 MHz,  $\text{CDCl}_3$ )  $\delta$  = 7.63 (dd,  $J = 7.6, 1.1$  Hz, 1 H), 7.34 – 7.28 (m, 1 H), 7.01 (dd,  $J = 8.2, 1.1$  Hz, 1 H), 6.96 (brs, 1 H), 4.54 – 4.47 (m, 1 H), 4.23 – 4.13 (m, 1 H), 3.64 – 3.51 (m, 1 H), 3.39 – 3.22 (m, 2 H), 2.19 – 2.01 (m, 1 H), 1.93 – 1.79 (m, 1 H).  $^{13}\text{C}$  NMR (75 MHz,  $\text{CDCl}_3$ )  $\delta$  = 166.40, 152.53, 128.78, 128.09, 123.00, 120.00, 119.89, 65.50, 45.56, 30.56, 25.28. HRMS  $m/z$  (ESI) calcd for  $\text{C}_{11}\text{H}_{11}\text{NO}_2\text{Na}$  ( $M + \text{Na}$ ) $^+$  212.0682, found 212.0688.

**5a,6,7,8,8a,9-Hexahydro-5*H*-pyrano[2,3,4,5-*lmn*]phenanthridin-10(5a1*H*)-one (2f)**

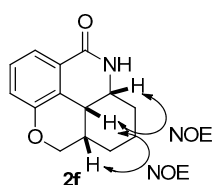

The reaction of **1f** (66 mg, 0.20 mmol, 1.00 eq), [Cp\*RhCl<sub>2</sub>]<sub>2</sub> (6.2 mg, 0.01 mmol, 5.0 mol%) and CsOPiv (93.6 mg, 0.40 mmol, 2.00 eq) in acetonitrile (4.0 mL) at rt under Ar was finished by the addition of 1 M NaOH. The phases were separated, the organic layer was extracted with EtOAc (3 x 20 mL), dried over MgSO<sub>4</sub>, filtered and concentrated. The crude material was subjected to column chromatography on silica (Pent:EtOAc, 2:1) and afforded 23 mg (50%) of **2f** as a white foam: <sup>1</sup>H NMR (400 MHz, CDCl<sub>3</sub>) δ = 7.59 (dd, *J* = 7.6, 1.1 Hz, 1 H), 7.25 – 7.19 (m, 1 H), 7.16 (brs, 1 H), 6.95 (dd, *J* = 8.2, 1.1 Hz, 1 H), 4.28 – 4.10 (m, 2 H), 3.62 – 3.59 (m, 2 H), 2.05 – 2.01 (m, 1 H), 1.78 – 1.55 (m, 3 H), 1.43 – 1.12 (m, 3 H). <sup>13</sup>C NMR (101 MHz, CDCl<sub>3</sub>) δ = 165.35, 152.82, 128.83, 127.76, 120.04, 119.86, 119.71, 70.06, 52.10, 33.39, 32.13, 28.94, 23.36, 22.93. HRMS *m/z* (ESI) calcd for C<sub>14</sub>H<sub>15</sub>NO<sub>2</sub>Na (M + Na)<sup>+</sup> 252.0995, found 252.0999.

**2,3,3a,4,5,6-Hexahydro-1*H*-benzo[*de*]isoquinolin-1-one (2g)**

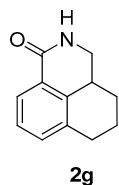

The reaction of **1g** (58 mg, 0.20 mmol), [Cp\*RhCl<sub>2</sub>]<sub>2</sub> (6.2 mg, 5 mol %) and CsOPiv (94 mg, 2.0 equiv) in MeCN (4.0 mL) at room temperature under Ar led to full conversion of the starting material after 12 hours. The residue was then purified by silica gel chromatography (ethyl acetate 100%) affording 15 mg (40%) of **2g** as white solid: <sup>1</sup>H NMR (300 MHz, CDCl<sub>3</sub>) δ 7.88 (t, *J* = 4.7 Hz, 1H), 7.26 (d, *J* = 4.7 Hz, 2H), 6.43 (brs, 1H), 3.45 (dd, *J* = 11.3, 5.0 Hz, 1H), 3.25 (dd, *J* = 13.2, 11.3 Hz, 1H), 3.20 – 3.01 (m, 1H), 2.97 – 2.71 (m, 2H), 2.15 – 1.95 (m, 2H), 1.87 – 1.67 (m, 1H), 1.47 – 1.29 (m, 1H). <sup>13</sup>C NMR (101 MHz, CDCl<sub>3</sub>) δ 166.31, 137.78, 135.43, 132.92, 126.55, 125.72, 46.09, 34.54, 28.44, 26.39, 21.99. HRMS *m/z* (ESI) calcd for C<sub>12</sub>H<sub>13</sub>NONa (M + Na)<sup>+</sup> 210.0895, found 210.0901.

**1,11b-Dihydrochromeno[4,3,2-*de*]isoquinolin-3(2*H*)-one (2h)**

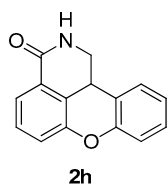

The reaction of **1h** (68 mg, 0.20 mmol, 1.00 eq), [Cp\*RhCl<sub>2</sub>]<sub>2</sub> (3.1 mg, 0.005 mmol, 2.5 mol%) and CsOPiv (93.6 mg, 0.40 mmol, 2.00 eq) in acetonitrile (4.0 mL) at rt under Ar was finished by the addition of 1 M NaOH. The phases were separated, the organic layer was extracted with EtOAc (3 x 20 mL), dried over MgSO<sub>4</sub>, filtered and concentrated. The crude material was subjected to column chromatography on silica (Pent:EtOAc, 2:1) and afforded 26.0 mg (56%) of **2h** as a white solid: <sup>1</sup>H NMR (600 MHz, CDCl<sub>3</sub>) δ 7.82 (dd, *J* = 7.6, 1.1 Hz, 1H), 7.40 – 7.36 (m, 1H), 7.30 (t, *J* = 7.7 Hz, 1H), 7.25 (s, 1H), 7.20 (d, *J* = 7.6 Hz, 1H), 7.16 – 7.10 (m, 2H), 6.32 (brs, 1H), 4.50 (dd, *J* = 13.0, 5.7 Hz, 1H), 4.09 (dt, *J* = 11.4, 5.6 Hz, 1H), 3.71 (dd, *J* = 12.8, 11.7 Hz, 1H). <sup>13</sup>C NMR (151 MHz, CDCl<sub>3</sub>) δ 165.37, 151.49, 150.08, 128.85, 128.48, 125.87, 123.70, 122.75, 121.77, 120.10, 119.68, 117.15, 44.75, 30.31. **HRMS** *m/z* (ESI) calcd for C<sub>15</sub>H<sub>11</sub>NO<sub>2</sub>Na (M + Na)<sup>+</sup> 260.0687, found 260.0682.

#### 7-Methyl-2,2a,3,4-tetrahydrofuro[4,3,2-*de*]pyrrolo[3,2-*g*]isoquinolin-5(7*H*)-one (2i)

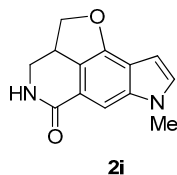

The reaction of **1i** (66 mg, 0.20 mmol, 1.00 eq), [Cp\*RhCl<sub>2</sub>]<sub>2</sub> (3.1 mg, 0.005 mmol, 2.5 mol%) and CsOPiv (93.6 mg, 0.40 mmol, 2.00 eq) in acetonitrile (4.0 mL) at rt under Ar was finished by the addition of 1 M NaOH. The phases were separated, the organic layer was extracted with EtOAc (3 x 20 mL), dried over MgSO<sub>4</sub>, filtered and concentrated. The crude material was subjected to column chromatography on silica (Pent:EtOAc, 2:1) and afforded 40.0 mg (88%) of **2i** as a white solid: <sup>1</sup>H NMR (300 MHz, CDCl<sub>3</sub>) δ 7.50 – 7.44 (m, 1H), 7.12 (d, *J* = 3.1 Hz, 1H), 6.57 (brs, 1H), 6.50 – 6.42 (m, 1H), 4.99 (t, *J* = 8.6 Hz, 1H), 4.33 (dd, *J* = 11.4, 8.7 Hz, 1H), 4.06 (tdd, *J* = 11.6, 8.3, 6.0 Hz, 1H), 3.81 (s, 3H), 3.75 (dt, *J* = 11.0, 5.4 Hz, 1H), 3.60 – 3.46 (m, 1H). <sup>13</sup>C NMR (75 MHz, CDCl<sub>3</sub>) δ 167.51, 149.88, 139.48, 131.18, 119.41, 119.24, 116.99, 100.27, 97.15, 77.88, 46.63, 36.84, 33.65. **HRMS** *m/z* (ESI) calcd for C<sub>13</sub>H<sub>12</sub>N<sub>2</sub>O<sub>2</sub>Na (M + Na)<sup>+</sup> 251.0796, found 252.0791.

**7-Ethyl-9-methyl-2,2a,3,4-tetrahydrofuro[4,3,2-*de*]pyrrolo[2,3-*g*]isoquinolin-5(9*H*)-one (2j)**

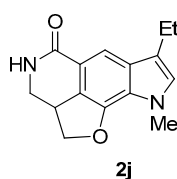

The reaction of **1j** (71.6 mg, 0.20 mmol, 1.00 eq), [Cp<sup>\*</sup>RhCl<sub>2</sub>]<sub>2</sub> (3.1 mg, 0.005 mmol, 2.5 mol%) and CsOPiv (93.6 mg, 0.40 mmol, 2.00 eq) in acetonitrile (4.0 mL) at rt under Ar was finished by the addition of 1 M NaOH. The phases were separated, the organic layer was extracted with EtOAc (3 x 20 mL), dried over MgSO<sub>4</sub>, filtered and concentrated. The crude material was subjected to column chromatography on silica (Pent:EtOAc, 2:1) and afforded 46 mg (90%) of **2j** as a white solid: <sup>1</sup>H NMR (300 MHz, CDCl<sub>3</sub>) δ 7.73 (s, 1H), 6.75 (s, 1H), 6.40 (brs, 1H), 4.96 (t, *J* = 8.5 Hz, 1H), 4.29 (dd, *J* = 11.6, 8.6 Hz, 1H), 4.16 – 3.96 (m, 1H), 3.91 (s, 3H), 3.74 (dt, *J* = 10.9, 5.4 Hz, 1H), 3.51 (t, *J* = 11.8 Hz, 1H), 2.74 (q, *J* = 7.5 Hz, 2H), 1.29 (t, *J* = 7.5 Hz, 3H). <sup>13</sup>C NMR (75 MHz, CDCl<sub>3</sub>) δ 167.67, 142.18, 131.00, 126.24, 125.44, 123.06, 120.81, 116.86, 110.69, 77.97, 46.46, 37.27, 34.75, 18.39, 14.60. **HRMS** *m/z* (ESI) calcd for C<sub>15</sub>H<sub>16</sub>N<sub>2</sub>O<sub>2</sub>Na (M + Na)<sup>+</sup> 279.1109, found 279.1104.

**3,3a,4,5-Tetrahydrobenzo[*b*]pyrido[3,4,5-*gh*]pyrrolizin-1(2*H*)-one (2k)**

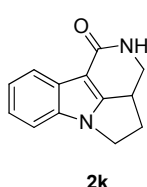

The reaction of **1k** (63 mg, 0.20 mmol, 1.00 eq), [Cp<sup>\*</sup>RhCl<sub>2</sub>]<sub>2</sub> (3.1 mg, 0.005 mmol, 2.5 mol%) and CsOPiv (93.6 mg, 0.40 mmol, 2.00 eq) in acetonitrile (4.0 mL) at rt under Ar was finished by the addition of 1 M NaOH. The phases were separated, the organic layer was extracted with EtOAc (3 x 20 mL), dried over MgSO<sub>4</sub>, filtered and concentrated. The crude material was subjected to column chromatography on silica (Pent:EtOAc, 2:1) and afforded 26.6 mg (63%) of **2k** as a white solid: <sup>1</sup>H NMR (300 MHz, CDCl<sub>3</sub>) δ 8.12 – 7.81 (m, 1H), 7.42 – 7.08 (m, 3H), 5.22 (brs, 1H), 4.53 – 4.13 (m, 2H), 3.99 – 3.60 (m, 2H), 3.34 (t, *J* = 11.2 Hz, 1H), 2.87 (dt, *J* = 12.6, 6.3 Hz, 1H), 2.38 (dq, *J* = 12.7, 9.4 Hz, 1H). <sup>13</sup>C NMR (75 MHz, CDCl<sub>3</sub>) δ 167.32, 159.05, 135.80, 128.88, 121.89, 121.65, 121.01, 110.57, 49.45, 47.89, 35.57, 31.91. **HRMS** *m/z* (ESI) calcd for C<sub>13</sub>H<sub>12</sub>N<sub>2</sub>ONa (M + Na)<sup>+</sup> 235.0847, found 235.0842.

### 2,3,3a,4,5,6-Hexahydro-1*H*-indolo[3,2,1-*ij*][1,6]naphthyridin-1-one (**2l**)

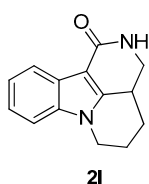

The reaction of **1l** (66 mg, 0.20 mmol, 1.00 eq), [Cp\**RhCl*<sub>2</sub>]<sub>2</sub> (3.1 mg, 0.005 mmol, 2.5 mol%) and CsOPiv (93.6 mg, 0.40 mmol, 2.00 eq) in acetonitrile (4.0 mL) at rt under Ar was finished by the addition of 1 M NaOH. The phases were separated, the organic layer was extracted with EtOAc (3 x 20 mL), dried over MgSO<sub>4</sub>, filtered and concentrated. The crude material was subjected to column chromatography on silica (Pent:EtOAc, 2:1) and afforded 27.0 mg (60%) of **2l** as a white solid: <sup>1</sup>H NMR (300 MHz, CDCl<sub>3</sub>) δ 8.09 (dd, *J* = 5.7, 2.5 Hz, 1H), 7.33 – 7.20 (m, 3H), 5.78 (s, 1H), 4.22 (dd, *J* = 11.9, 5.5 Hz, 1H), 3.77 (td, *J* = 12.0, 5.0 Hz, 1H), 3.62 – 3.46 (m, 1H), 3.42 – 3.15 (m, 2H), 2.32 (dd, *J* = 13.4, 3.5 Hz, 1H), 2.25 – 2.06 (m, 2H), 1.53 – 1.28 (m, 1H). <sup>13</sup>C NMR (75 MHz, CDCl<sub>3</sub>) δ 167.21, 145.72, 136.76, 125.50, 122.03, 121.95, 120.62, 109.30, 102.93, 47.22, 41.47, 32.02, 23.65, 22.56. HRMS *m/z* (ESI) calcd for C<sub>14</sub>H<sub>14</sub>N<sub>2</sub>ONa (*M* + Na)<sup>+</sup> 249.1004, found 249.1001.

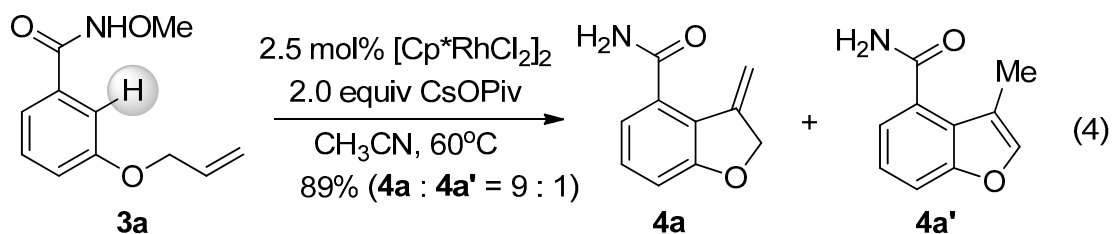

To a 10 mL Schlenk tube was added 3-(allyloxy)-*N*-methoxybenzamide (**3a**) (41.4 mg, 0.20 mmol), [Cp\**RhCl*<sub>2</sub>]<sub>2</sub> (3.1 mg, 2.5 mol %), CsOPiv (94.0 mg, 0.40 mmol) and the tube was purged with Ar for three times, followed by addition of CH<sub>3</sub>CN(4.0 mL). The formed mixture was stirred at 60°C under Ar for 12 h as monitored by TLC. The isomer ratio (**4a** : **4a'** = 9 : 1) was determined by crude <sup>1</sup>H NMR. The pure product **4a** can be formed via recrystallization from Pent/EtOAc in 89% yield (31.0 mg) as a light gray solid: <sup>1</sup>H NMR (400 MHz, CDCl<sub>3</sub>) δ 7.24 – 7.18 (m, 1H), 7.02 (dd, *J* = 7.6, 0.9 Hz, 1H), 6.96 – 6.88 (m, 1H), 6.14(s, 1H), 5.96 (s, 1H), 5.81 (t, *J* = 3.1 Hz, 1H), 5.18 (t, *J* = 2.7 Hz, 1H), 5.12 (t, *J* = 2.9 Hz, 2H). <sup>13</sup>C NMR (101 MHz, CDCl<sub>3</sub>) δ 170.28, 164.84, 141.34, 131.51, 130.44, 121.99, 119.75, 112.90,



105.47, 75.63. **HRMS**  $m/z$  (ESI) calcd for  $\text{C}_{10}\text{H}_9\text{NO}_2\text{Na}$  ( $M + \text{Na}$ )<sup>+</sup> 198.0531, found 198.0525.

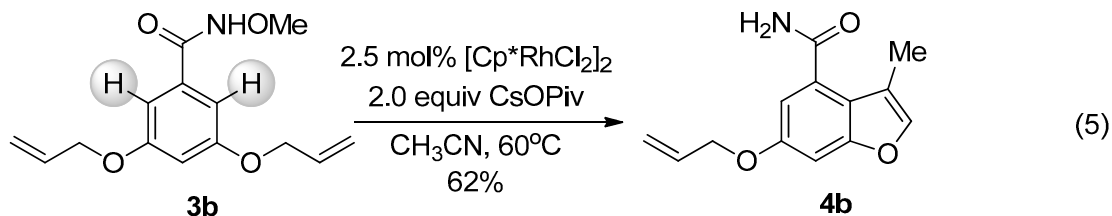

To a 10 mL Schlenk tube was added 3,5-bis(allyloxy)-*N*-methoxybenzamide (**3b**) (52.6 mg, 0.20 mmol),  $[\text{Cp}^*\text{RhCl}_2]_2$  (3.1 mg, 2.5 mol %), CsOPiv (94.0 mg, 0.40 mmol) and the tube was purged with Ar for three times, followed by addition of  $\text{CH}_3\text{CN}$  (4.0 mL). The formed mixture was stirred at 60°C under Ar for 12 h as monitored by TLC. The crude material was subjected to column chromatography on silica (Pent:EtOAc, 1:1) and afforded 28.0 mg (62%) of **4b** as a brown solid:  $^1\text{H}$  NMR (400 MHz,  $\text{CDCl}_3$ )  $\delta$  7.36 (d,  $J = 1.3$  Hz, 1H), 7.10 – 7.02 (m, 2H), 6.12 (s, 1H), 6.10–6.00 (m, 1H), 5.99 (s, 1H), 5.43 (dd,  $J = 17.3, 1.5$  Hz, 1H), 5.31 (dd,  $J = 10.5, 1.4$  Hz, 1H), 4.57 (dt,  $J = 5.3, 1.4$  Hz, 2H), 2.25 (d,  $J = 1.3$  Hz, 3H).  $^{13}\text{C}$  NMR (101 MHz,  $\text{CDCl}_3$ )  $\delta$  170.15, 157.08, 155.83, 142.36, 132.75, 129.20, 119.53, 118.04, 115.71, 111.05, 99.26, 69.48, 10.01. **HRMS**  $m/z$  (ESI) calcd for  $\text{C}_{13}\text{H}_{13}\text{NO}_3\text{Na}$  ( $M + \text{Na}$ )<sup>+</sup> 254.0793, found 254.0788.

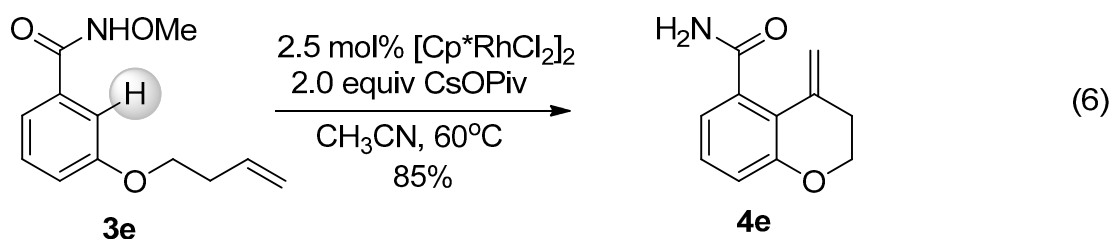

To a 10 mL Schlenk tube was added 3-(but-3-en-1-yloxy)-*N*-methoxybenzamide (**3e**) (44.2 mg, 0.20 mmol),  $[\text{Cp}^*\text{RhCl}_2]_2$  (3.1 mg, 2.5 mol %), CsOPiv (94.0 mg, 0.40 mmol) and the tube was purged with Ar for three times, followed by addition of  $\text{CH}_3\text{CN}$  (4.0 mL). The formed mixture was stirred at 60°C under Ar for 12 h as monitored by TLC. The crude material was subjected to column chromatography on

silica (Pent:EtOAc, 1:1) and afforded 32.0 mg (85%) of **4e** as a white solid:  $^1\text{H}$  NMR (400 MHz,  $\text{CDCl}_3$ )  $\delta$  7.21 – 7.08 (m, 1H), 6.94 (dd,  $J = 7.4, 1.2$  Hz, 1H), 6.86 (dd,  $J = 8.2, 1.2$  Hz, 1H), 6.09 (brs, 1H), 5.83 (brs, 1H), 5.57 (s, 1H), 5.12 (s, 1H), 4.31 (t,  $J = 5.7$  Hz, 2H), 2.68 (t,  $J = 5.7$  Hz, 2H).  $^{13}\text{C}$  NMR (101 MHz,  $\text{CDCl}_3$ )  $\delta$  172.92, 154.85, 135.12, 135.05, 128.91, 120.06, 119.19, 118.72, 113.91, 67.68, 32.36. **HRMS**  $m/z$  (ESI) calcd for  $\text{C}_{11}\text{H}_{11}\text{NO}_2\text{Na}$  ( $\text{M} + \text{Na}$ ) $^+$  212.0687, found 212.0682.

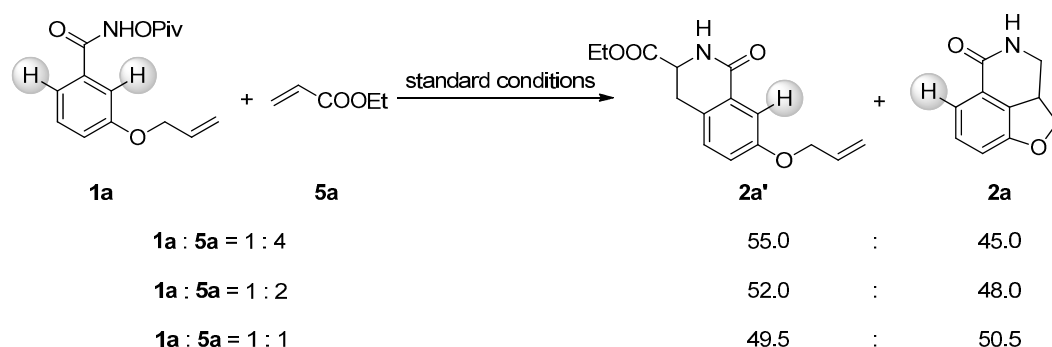

The ratios were determined directly by analysis of the crude  $^1\text{H}$  NMR. The product **2a'** can be isolated according to the following procedure.

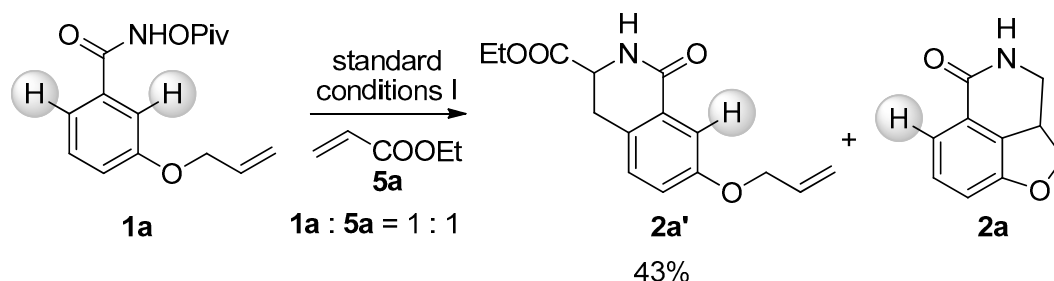

To a 10 mL Schlenk tube was added 3-(allyloxy)-*N*-(pivaloyloxy)benzamide (**1a**) (55.0 mg, 0.20 mmol), ethyl acrylate (22.0  $\mu\text{L}$ , 0.20 mmol),  $[\text{Cp}^*\text{RhCl}_2]_2$  (3.1 mg, 2.5 mol %), CsOPiv (94.0 mg, 0.20 mmol) and the tube was purged with Ar for three times, followed by addition of  $\text{CH}_3\text{CN}$  (4.0 mL). The formed mixture was stirred at room temperature under Ar for 12 h as monitored by TLC. The solution was then removed under vacuum directly. The crude material was subjected to column chromatography on silica (Pent:EtOAc, 1:1) and afforded 23.6 mg (43%) of **2a'** as a white solid:  $^1\text{H}$  NMR (300 MHz,  $\text{CDCl}_3$ )  $\delta$  7.58 (d,  $J = 2.7$  Hz, 1H), 7.14 (d,  $J = 8.4$  Hz, 1H), 7.04 (dd,  $J = 8.3, 2.7$  Hz, 1H), 6.64 (s, 1H), 6.04 (ddt,  $J = 17.2, 10.5, 5.3$  Hz,

1H), 5.41 (dd,  $J = 17.3, 1.5$  Hz, 1H), 5.28 (dd,  $J = 10.5, 1.4$  Hz, 1H), 4.57 (dt,  $J = 5.2, 1.4$  Hz, 2H), 4.35 (ddd,  $J = 10.2, 5.2, 1.8$  Hz, 1H), 4.24 (q,  $J = 7.1$  Hz, 2H), 3.36 – 3.03 (m, 2H), 1.28 (t,  $J = 7.1$  Hz, 3H).  $^{13}\text{C}$  NMR (75 MHz,  $\text{CDCl}_3$ )  $\delta$  170.28, 165.22, 158.01, 132.80, 129.30, 128.60, 128.51, 120.70, 117.87, 112.19, 68.96, 62.06, 53.29, 30.42, 14.09. **HRMS**  $m/z$  (ESI) calcd for  $\text{C}_{15}\text{H}_{17}\text{NO}_4\text{Na}$  ( $\text{M} + \text{Na}$ ) $^+$  298.1055, found 298.1050

#### 4. References

1. V. T. Perchyonok, S. J. Ryan, S. J. Langford, M. T. Hearn, K. L. Tuck, *Synlett* **2012**, 1233.
2. I. D. G. Watson, S. Ritter, F. D. Toste, *J. Am. Chem. Soc.* **2009**, *131*, 2056.
3. S. Wertz, D. Leifert, A. Studer, *Org. Lett.* **2013**, *15*, 928.
4. P. Kos, R. Savka, H. Plenio, *Adv. Synth. Catal.* **2013**, *355*, 439.
5. M. Kim, E. Vedejs, *J. Org. Chem.* **2004**, *69*, 6945.
6. N. Charrier, E. Demont, R. Dunsdon, G. Maile, A. Naylor, A. O'Brien, *Synthesis* **2006**, 3467.

5. <sup>1</sup>H NMR and <sup>13</sup>C NMR spectra of those compounds

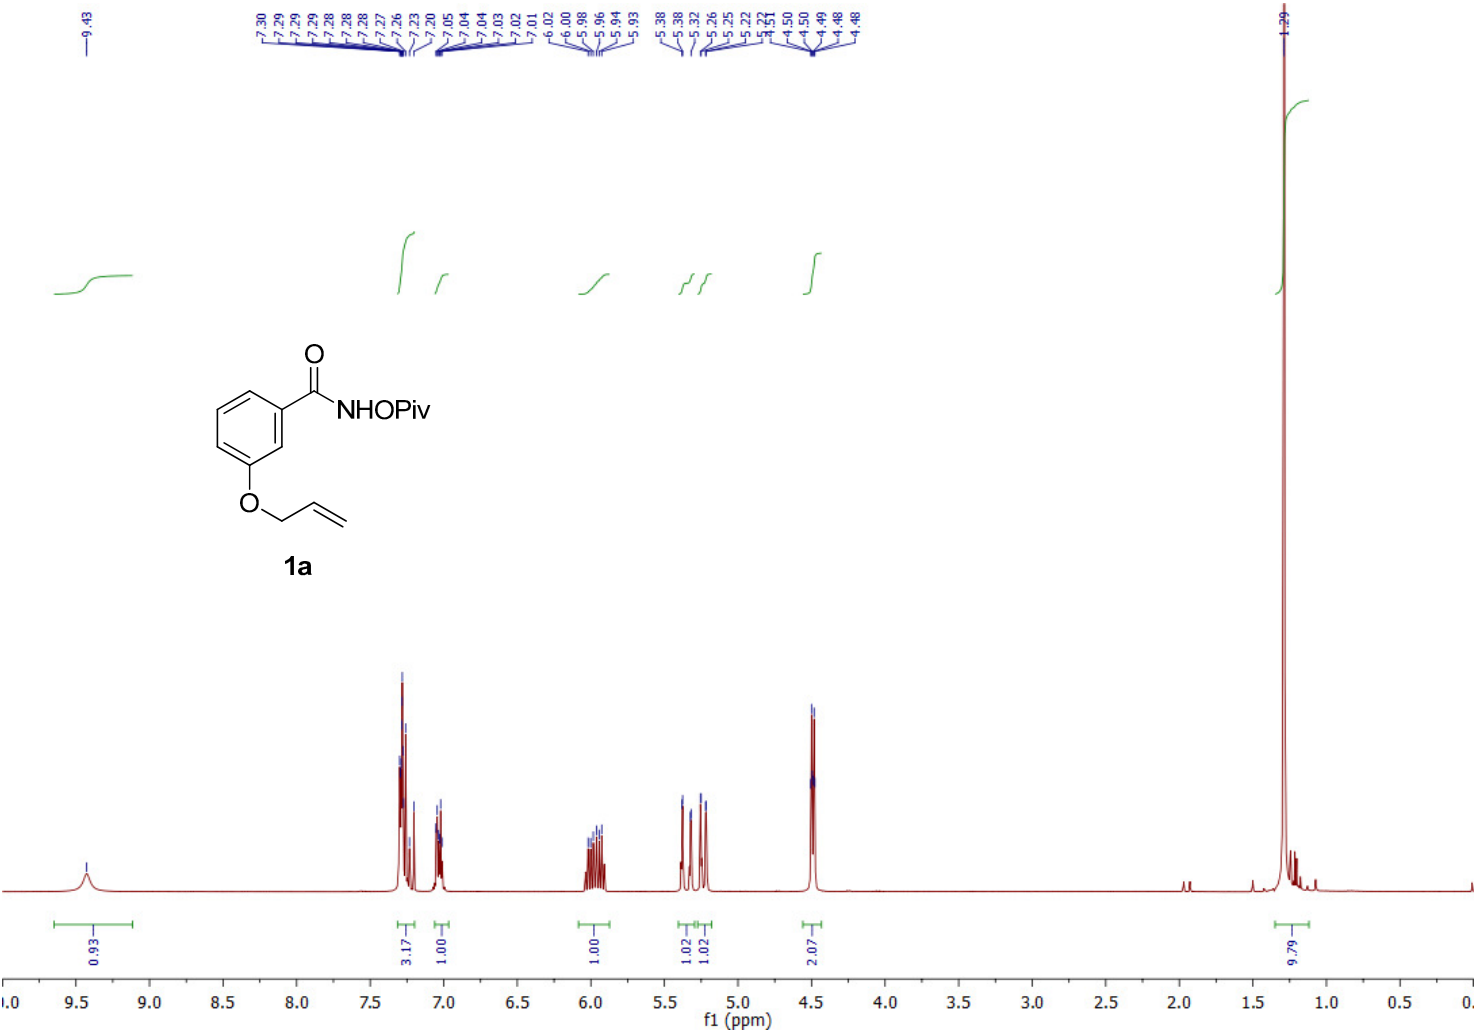

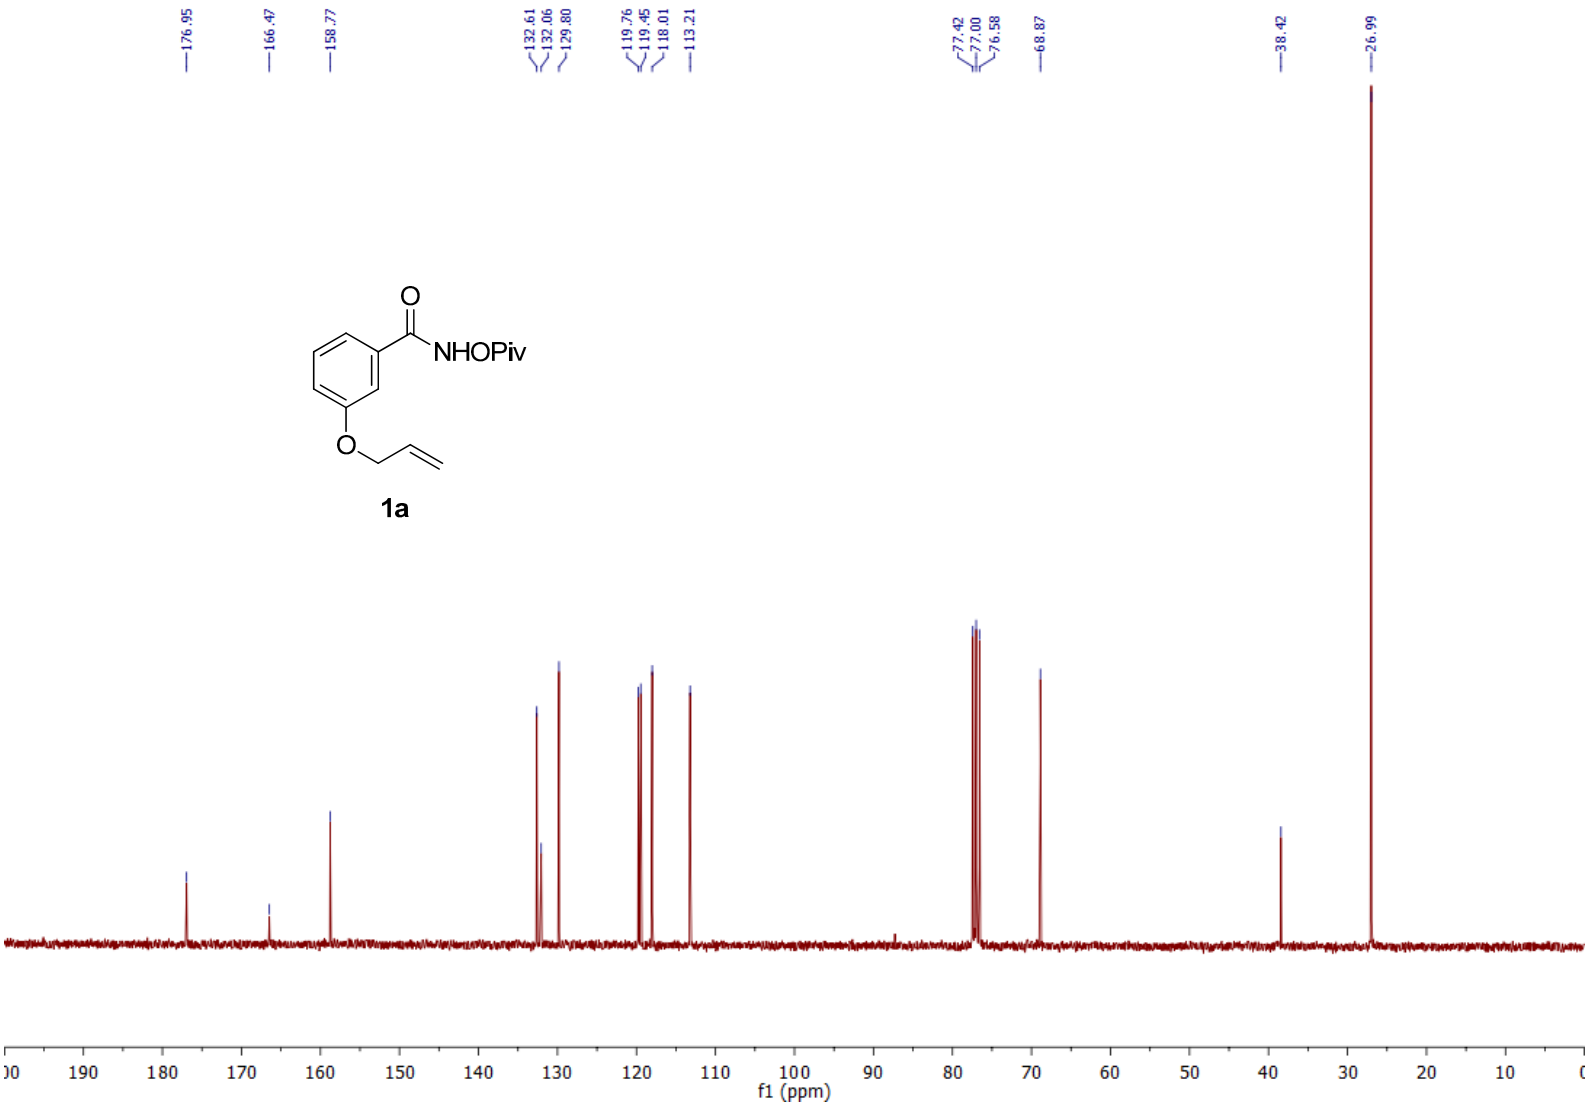

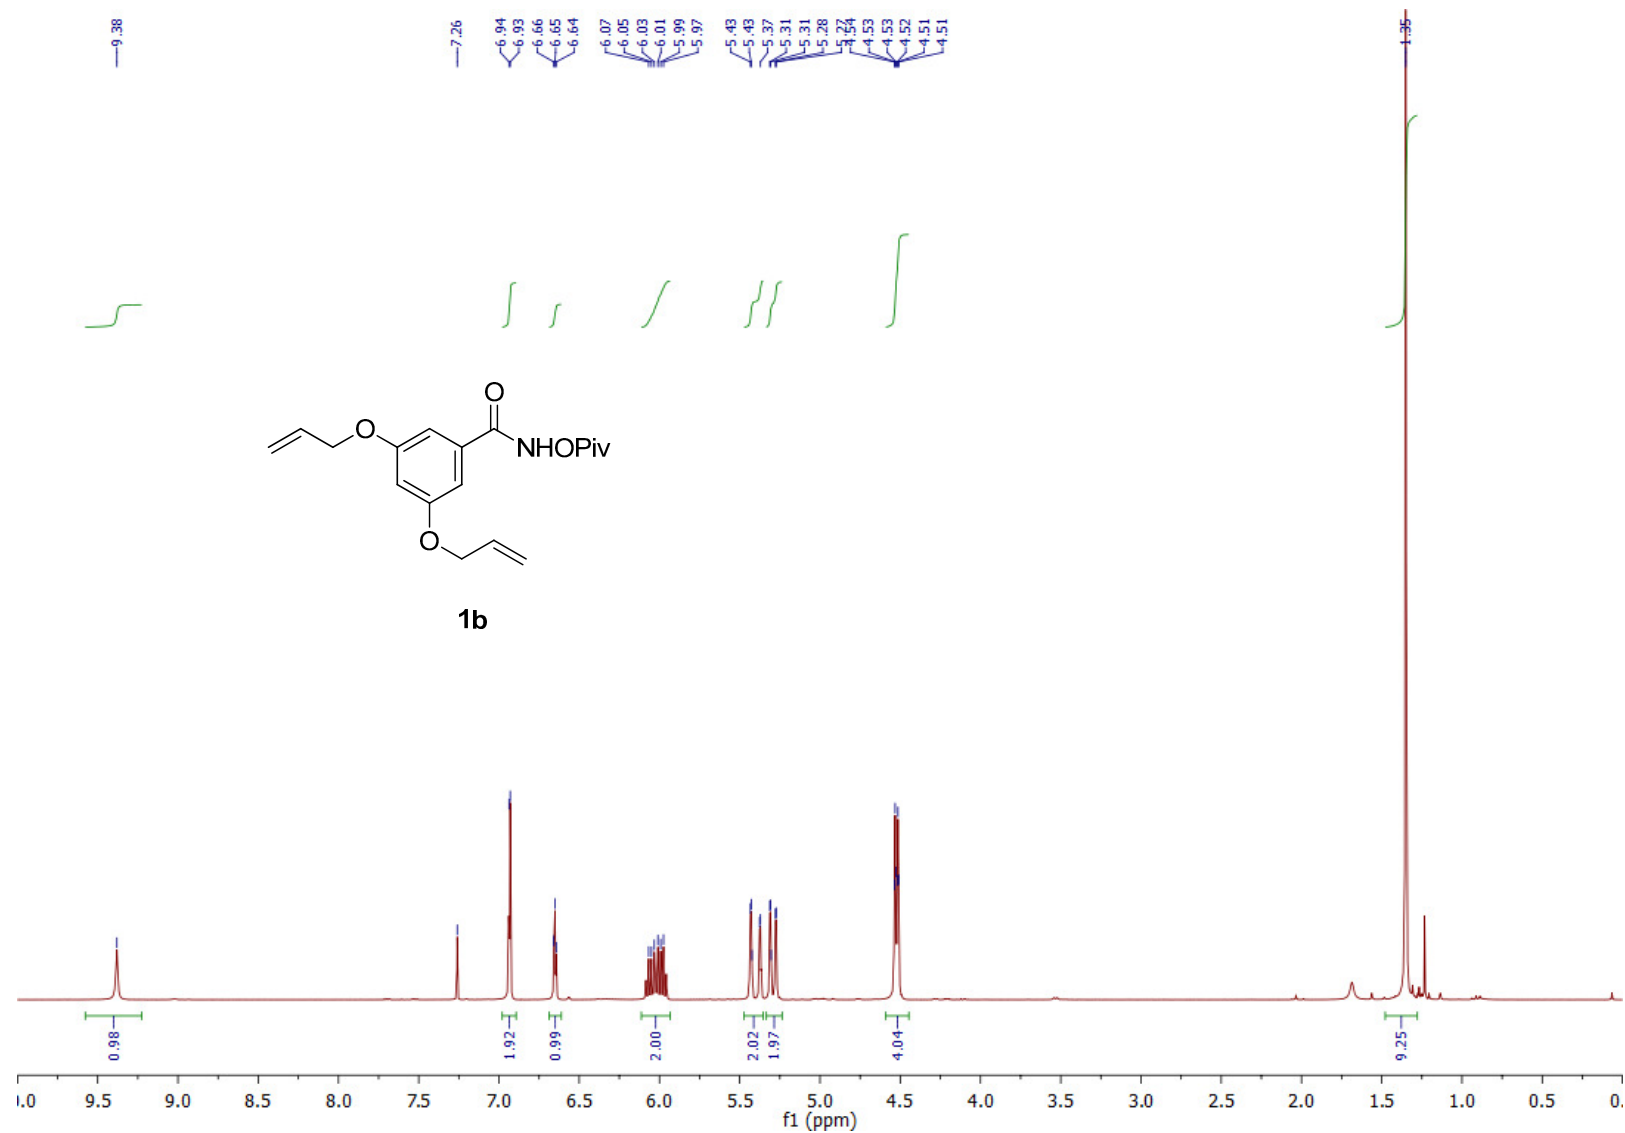

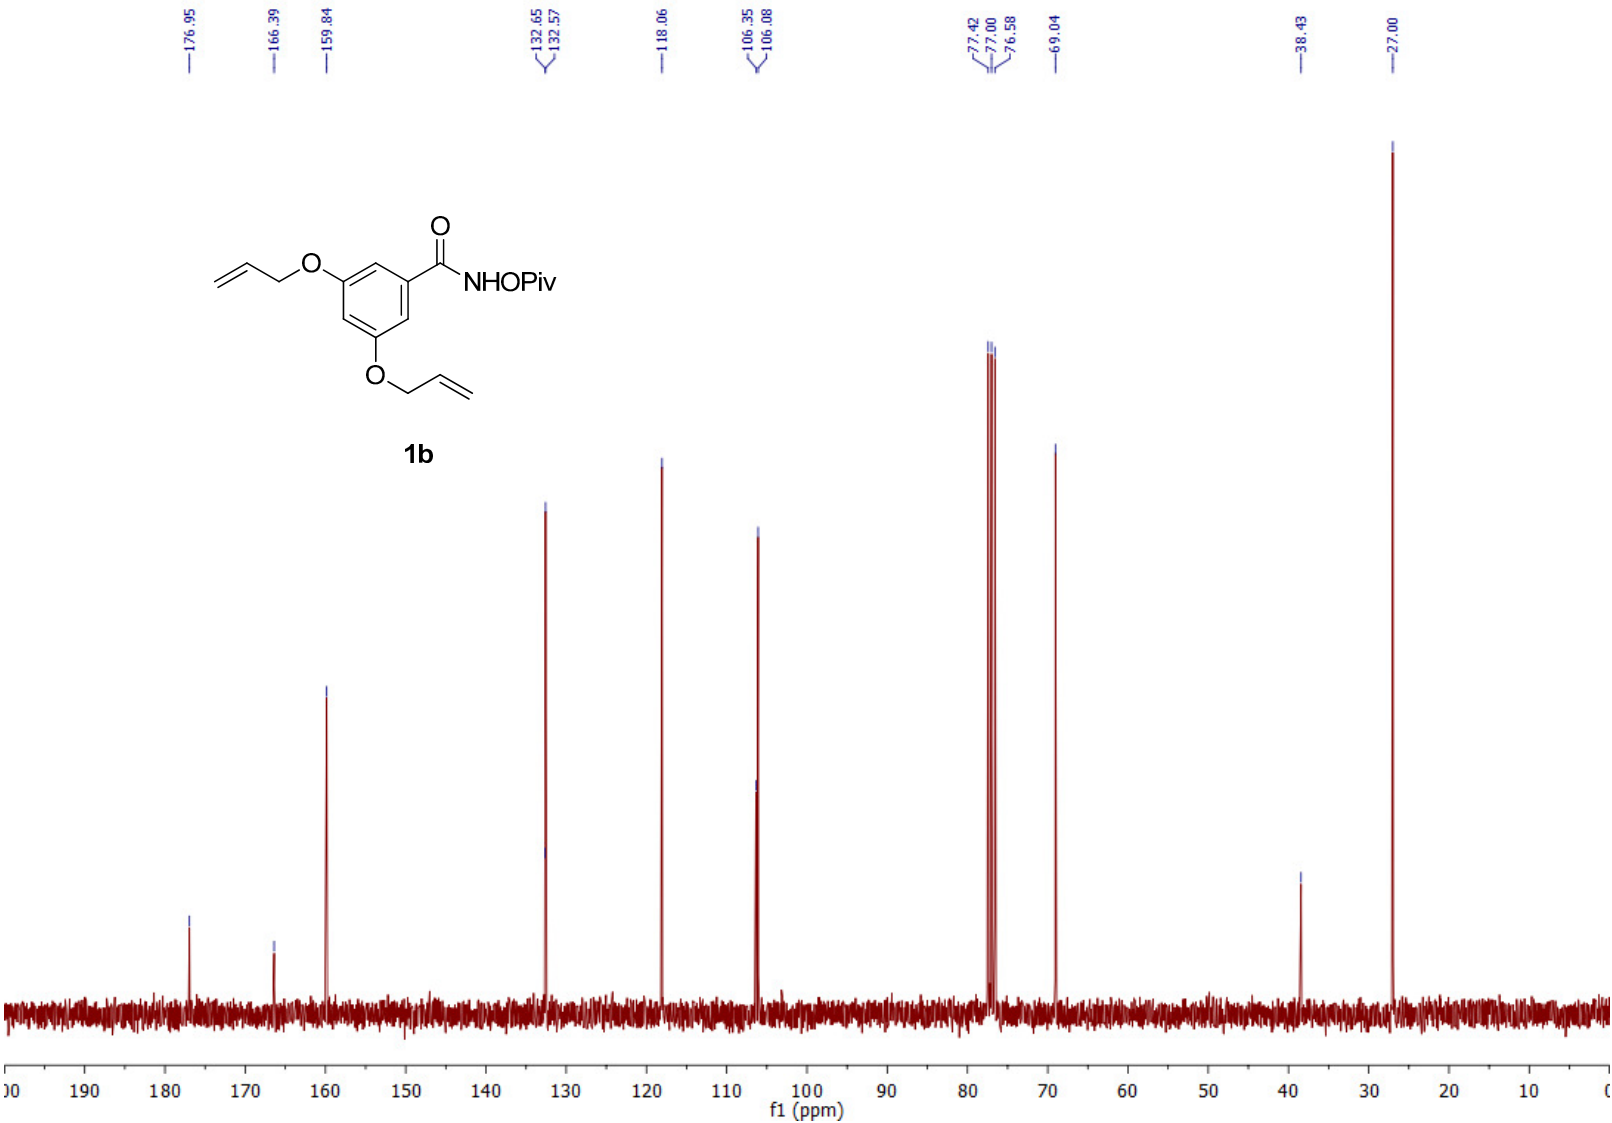

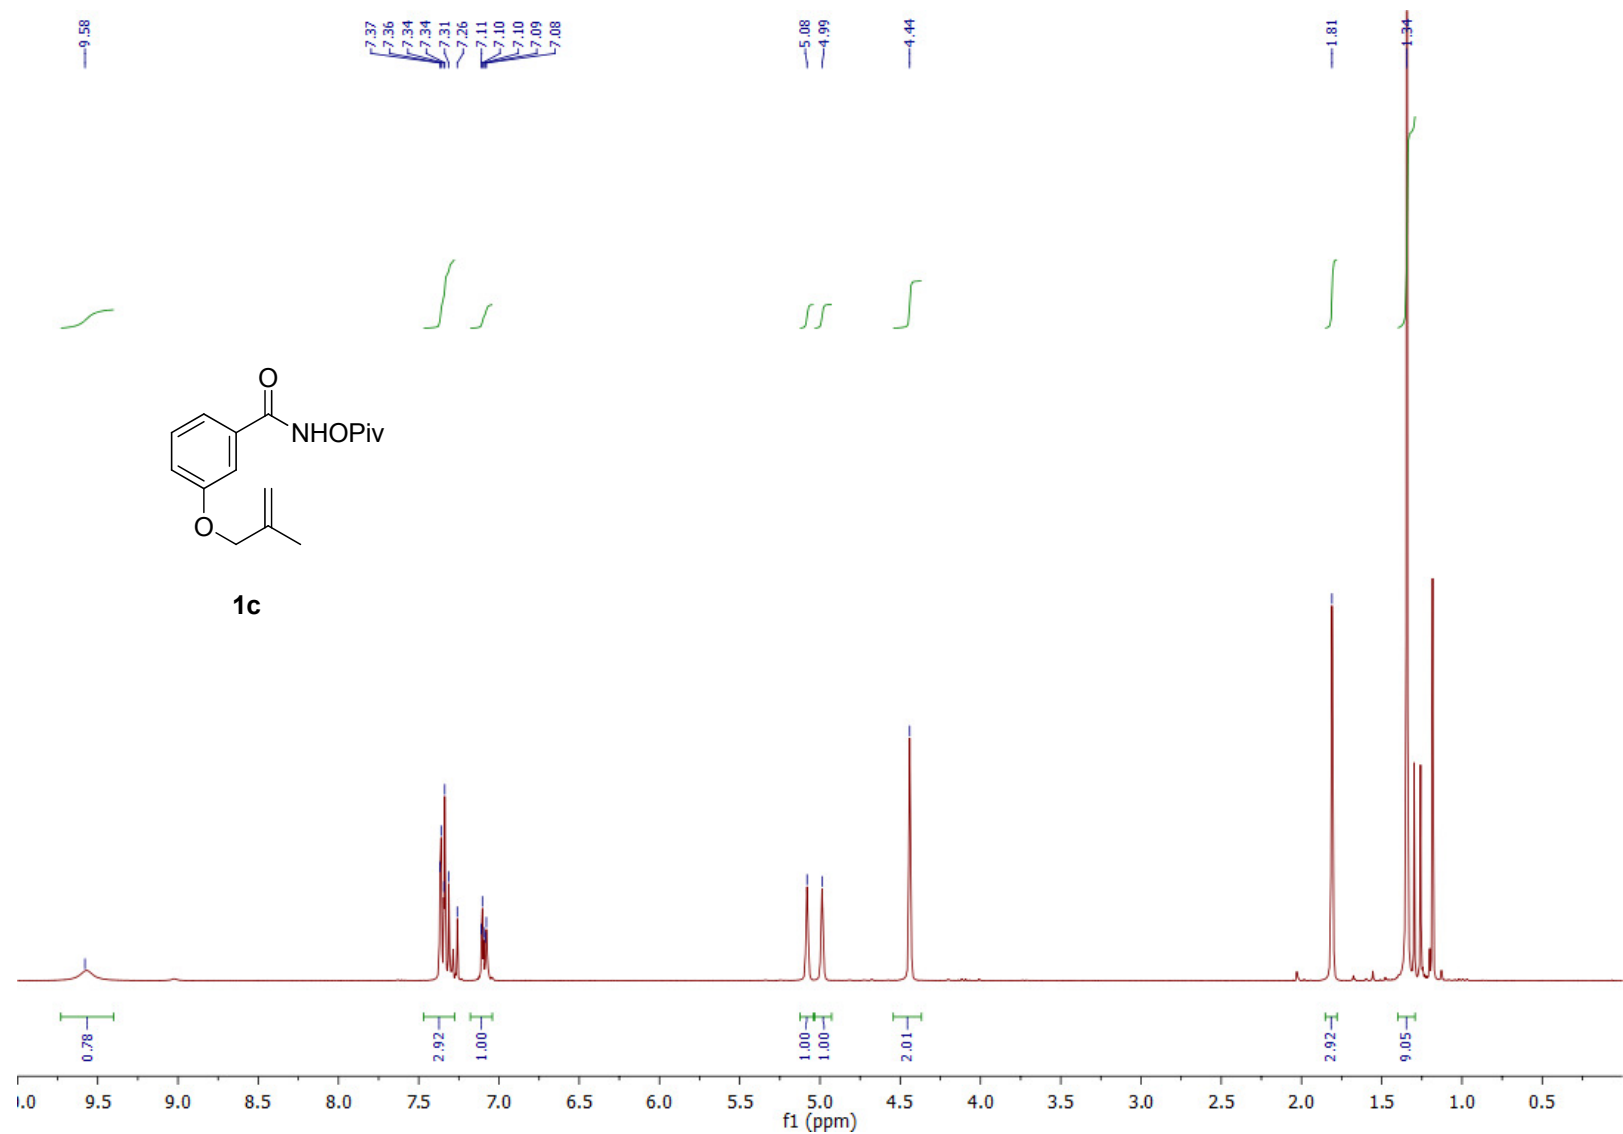



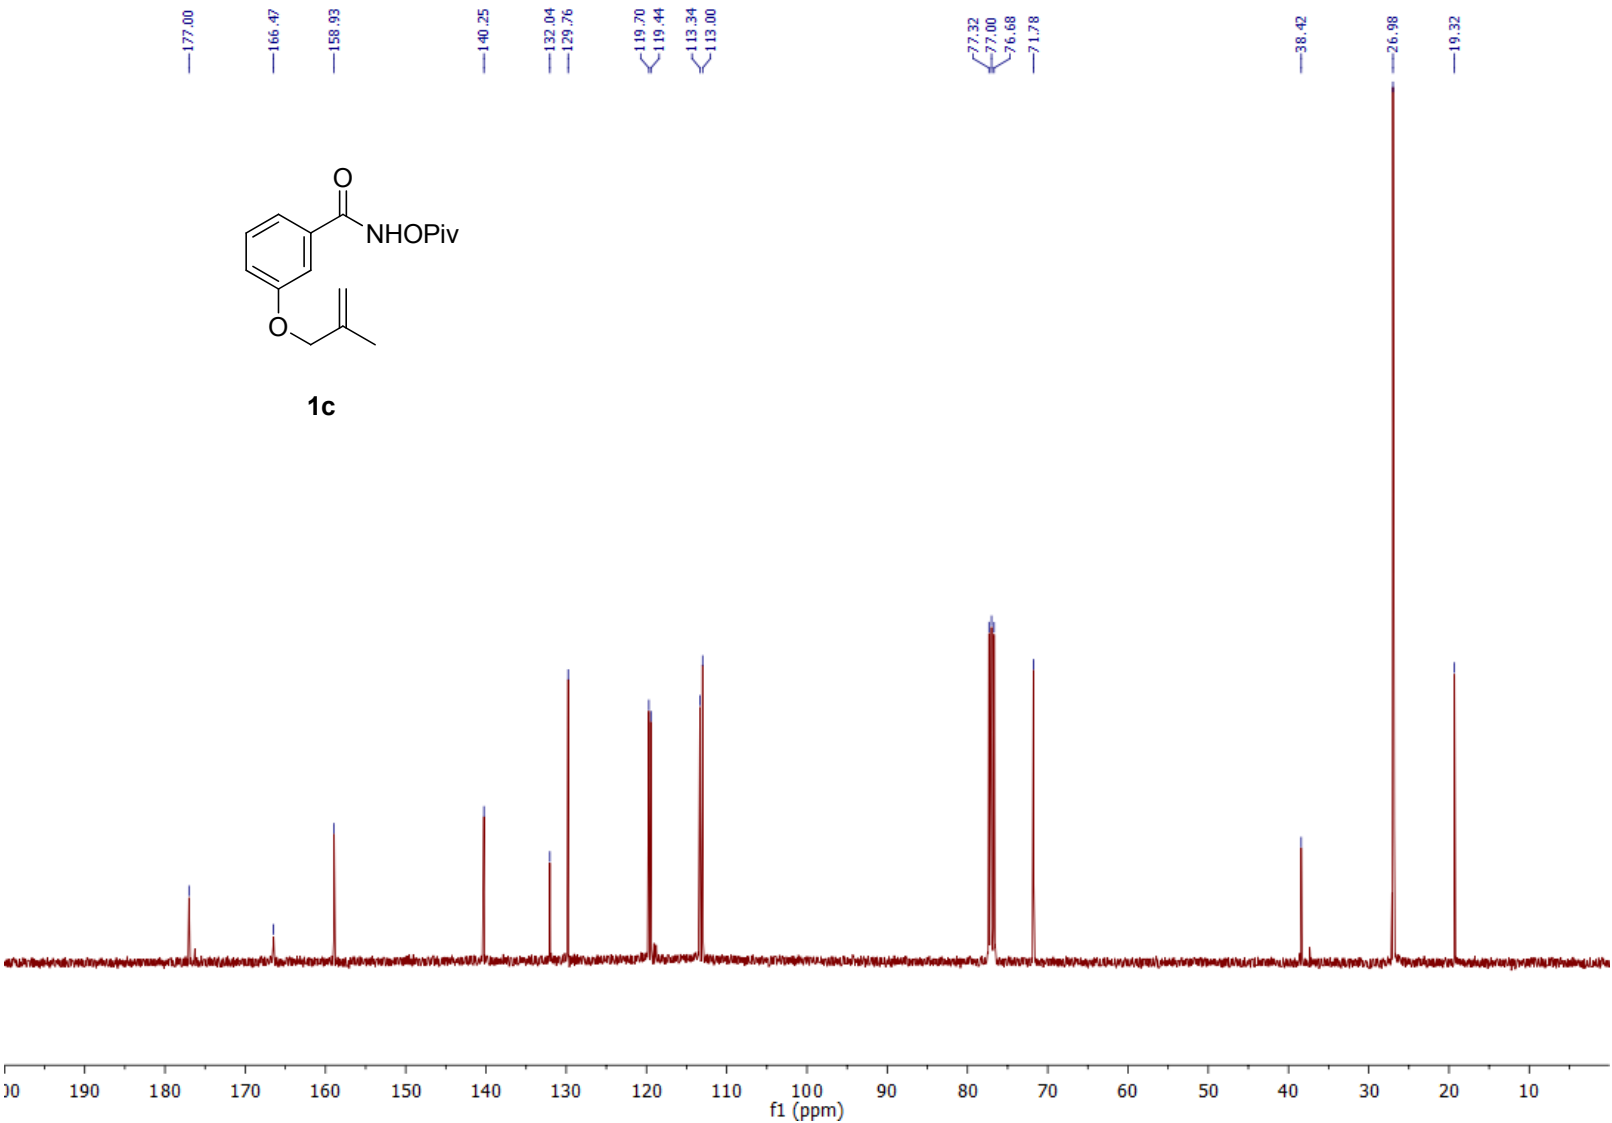

Nov28-2013.270.fid  
glo melissa mba mb 067 c f1  
proton CDCl3 /opt/topspin av1 35

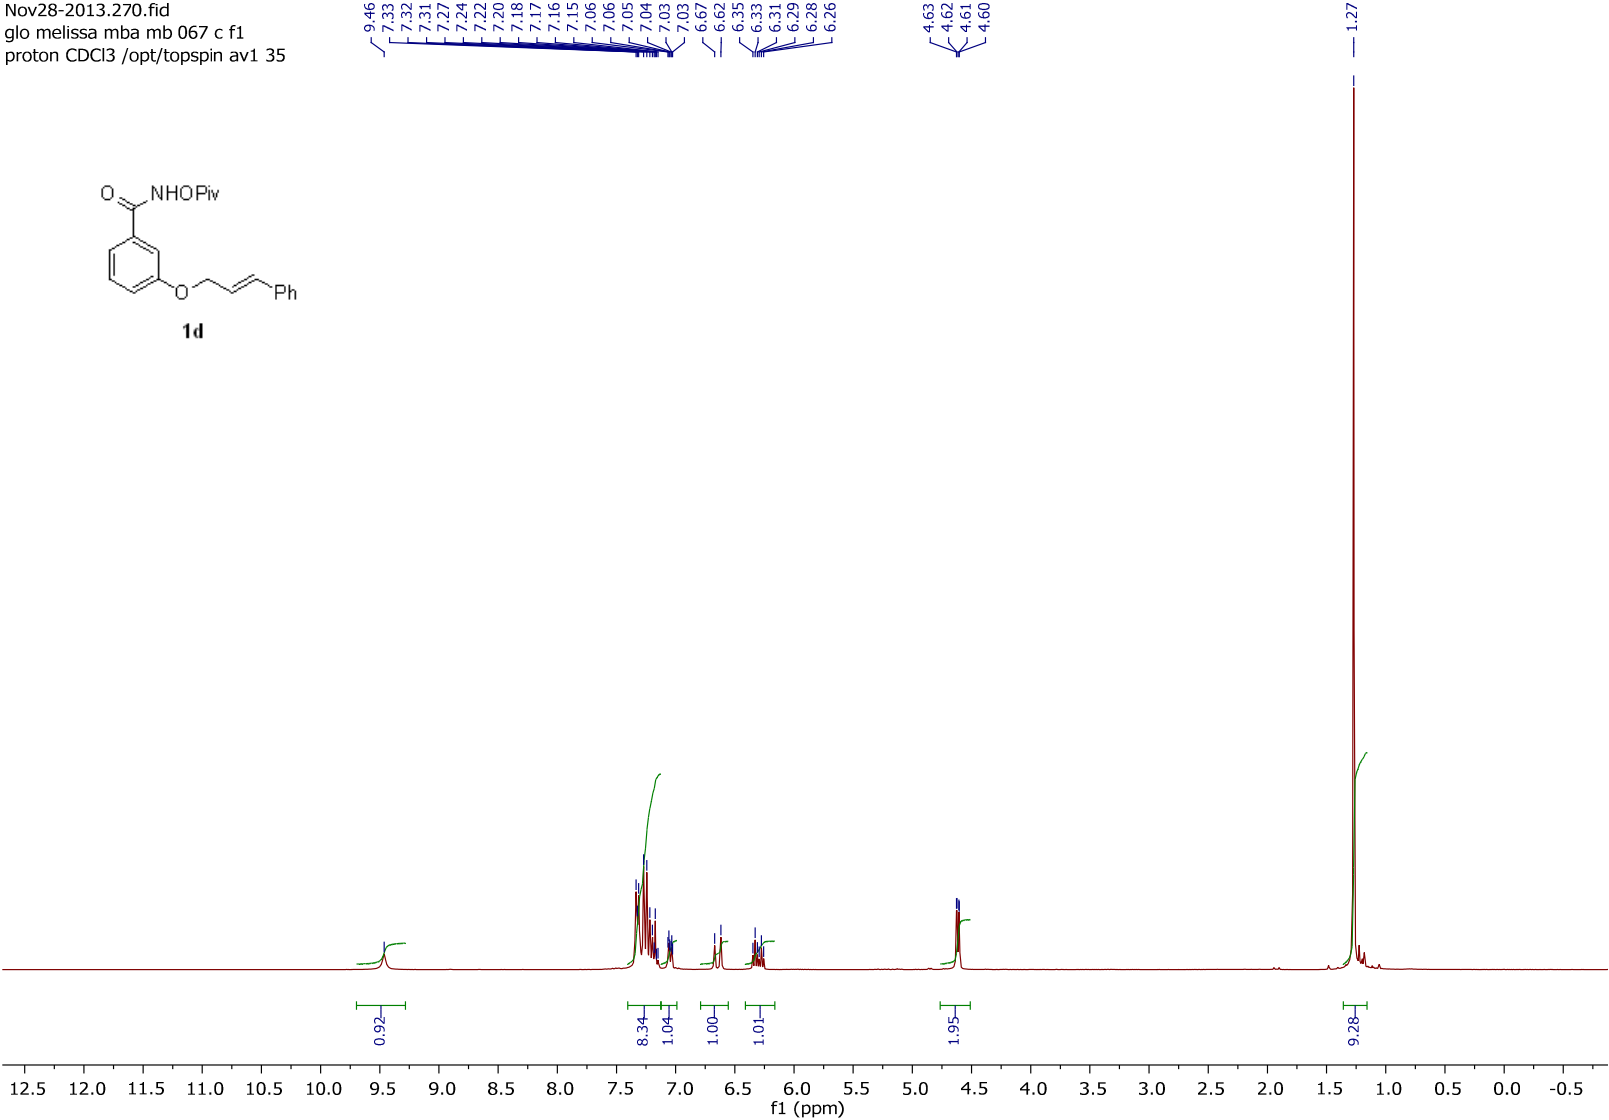

Nov28-2013.271.fid  
glo melissa mba mb 067 c f1  
carbon CDCl3 /opt/topspin av1 35

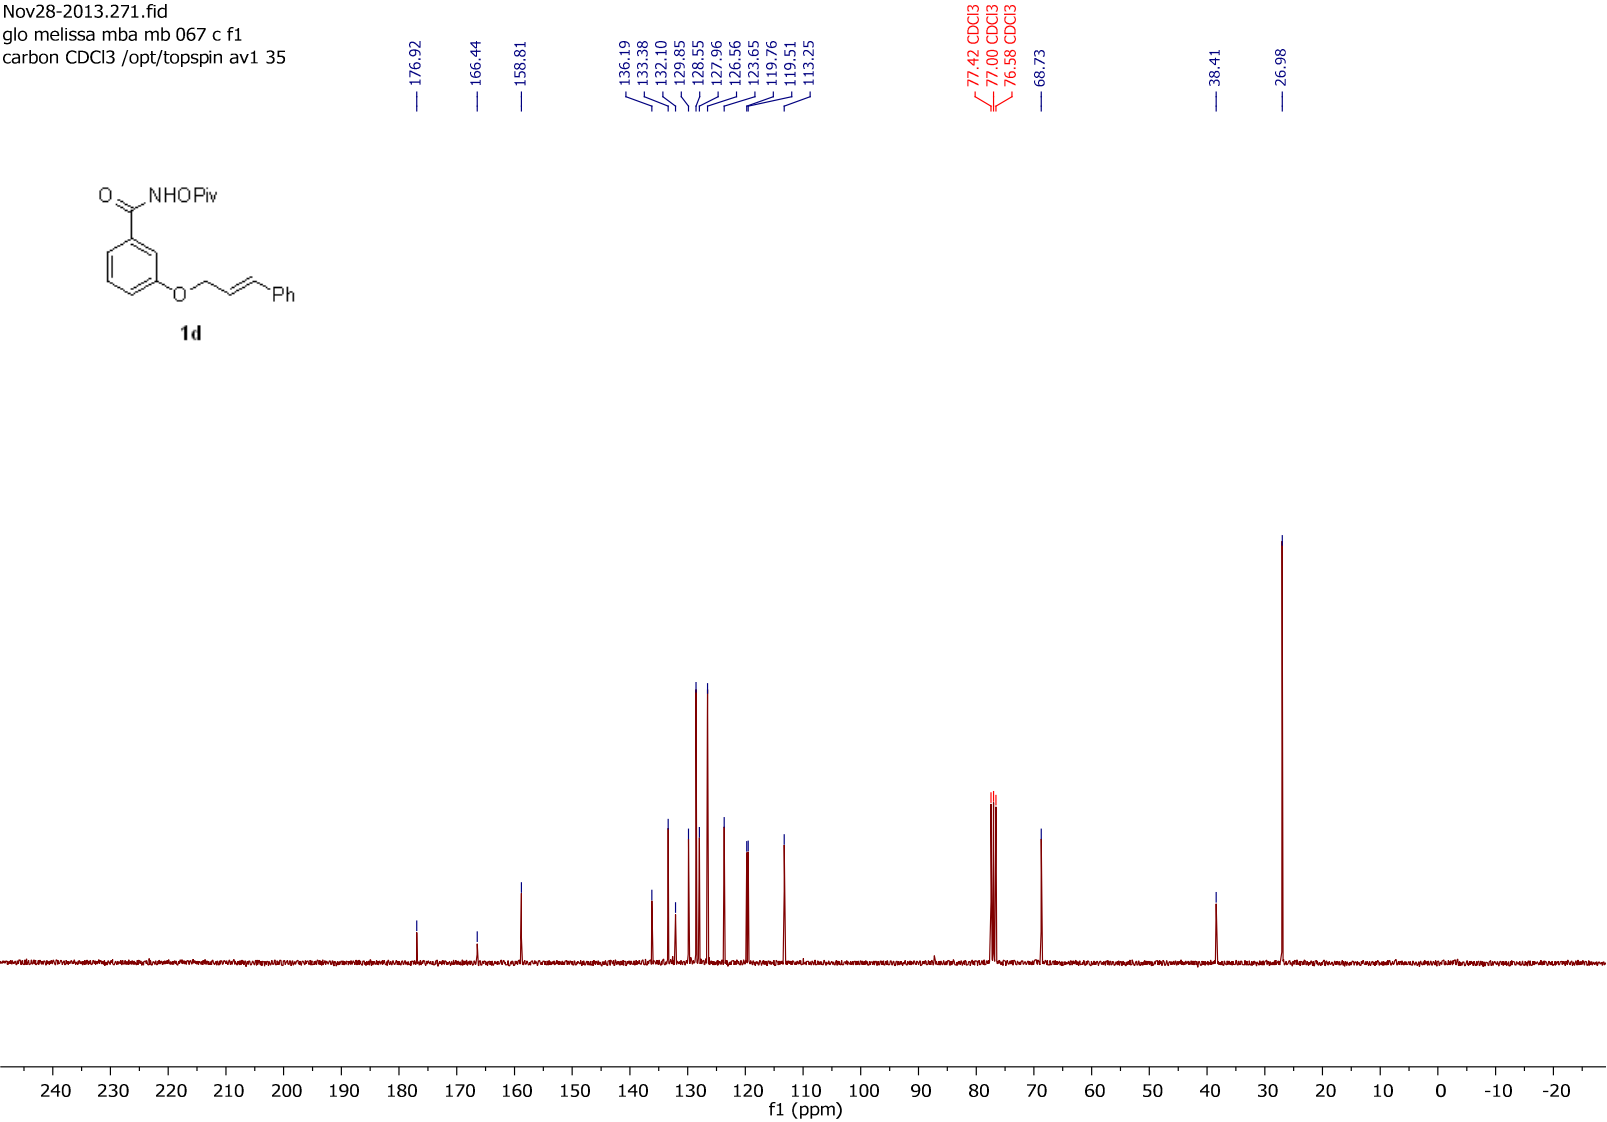

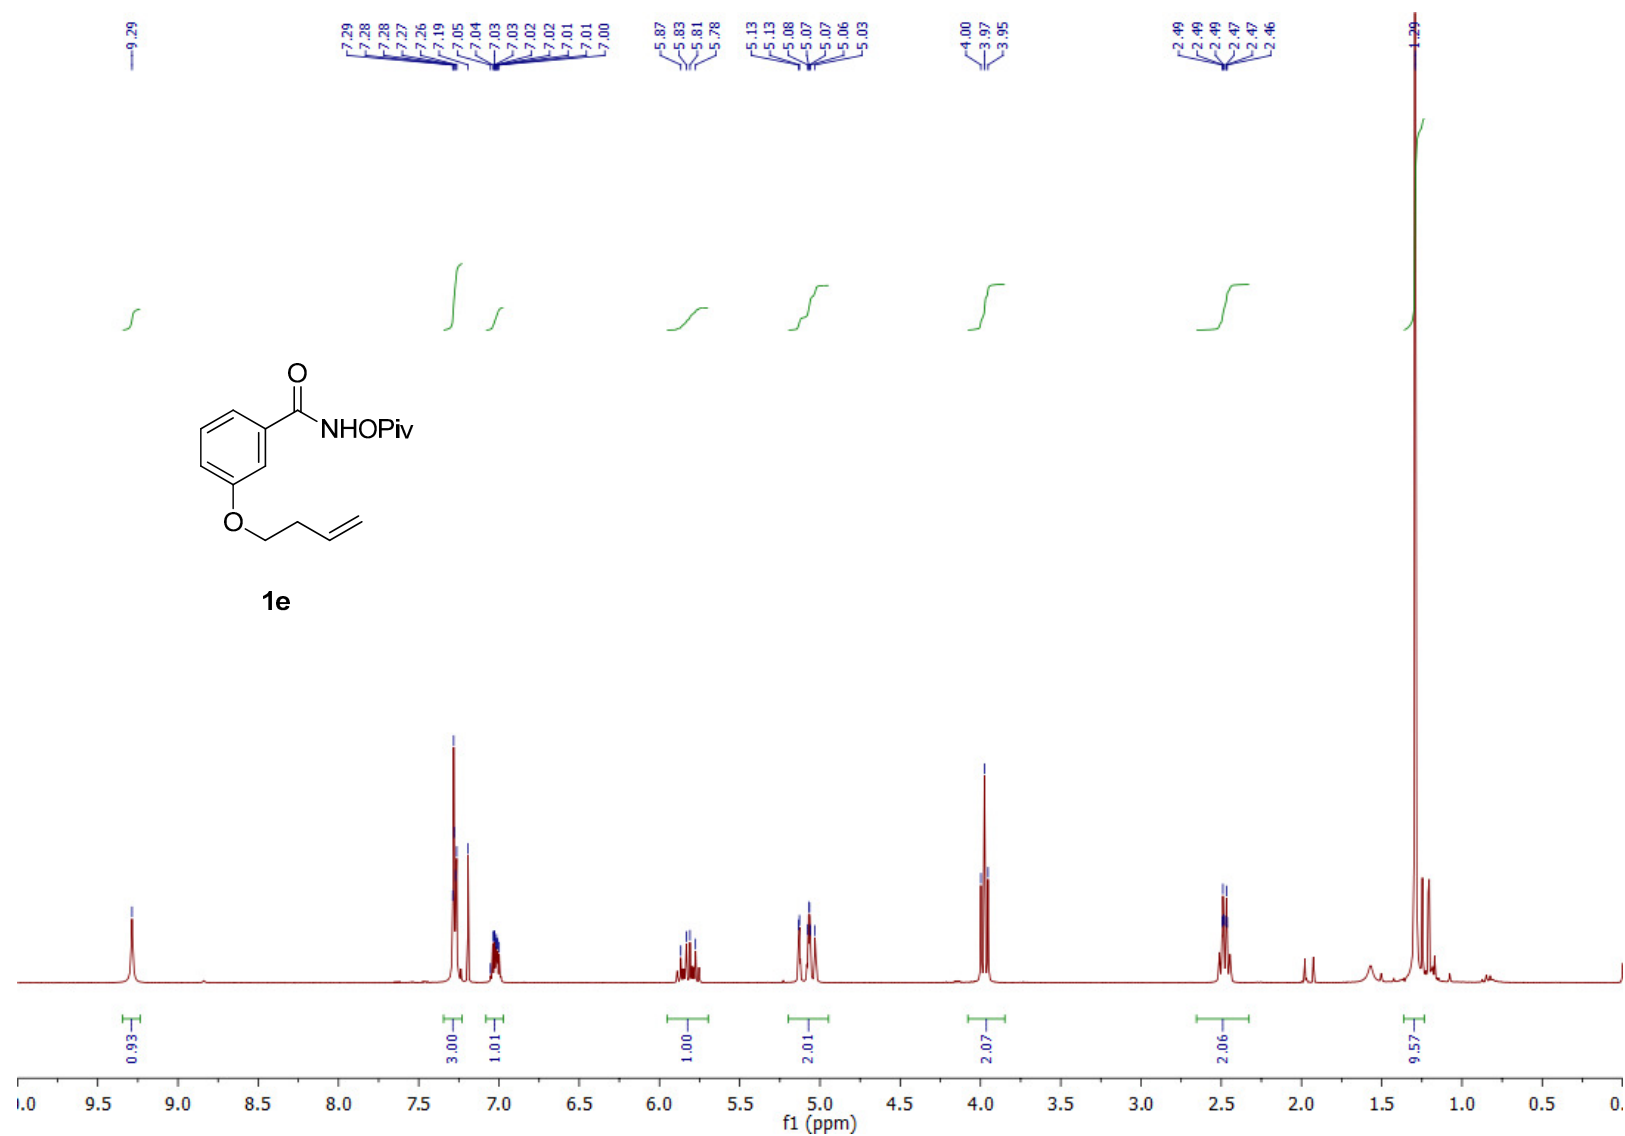

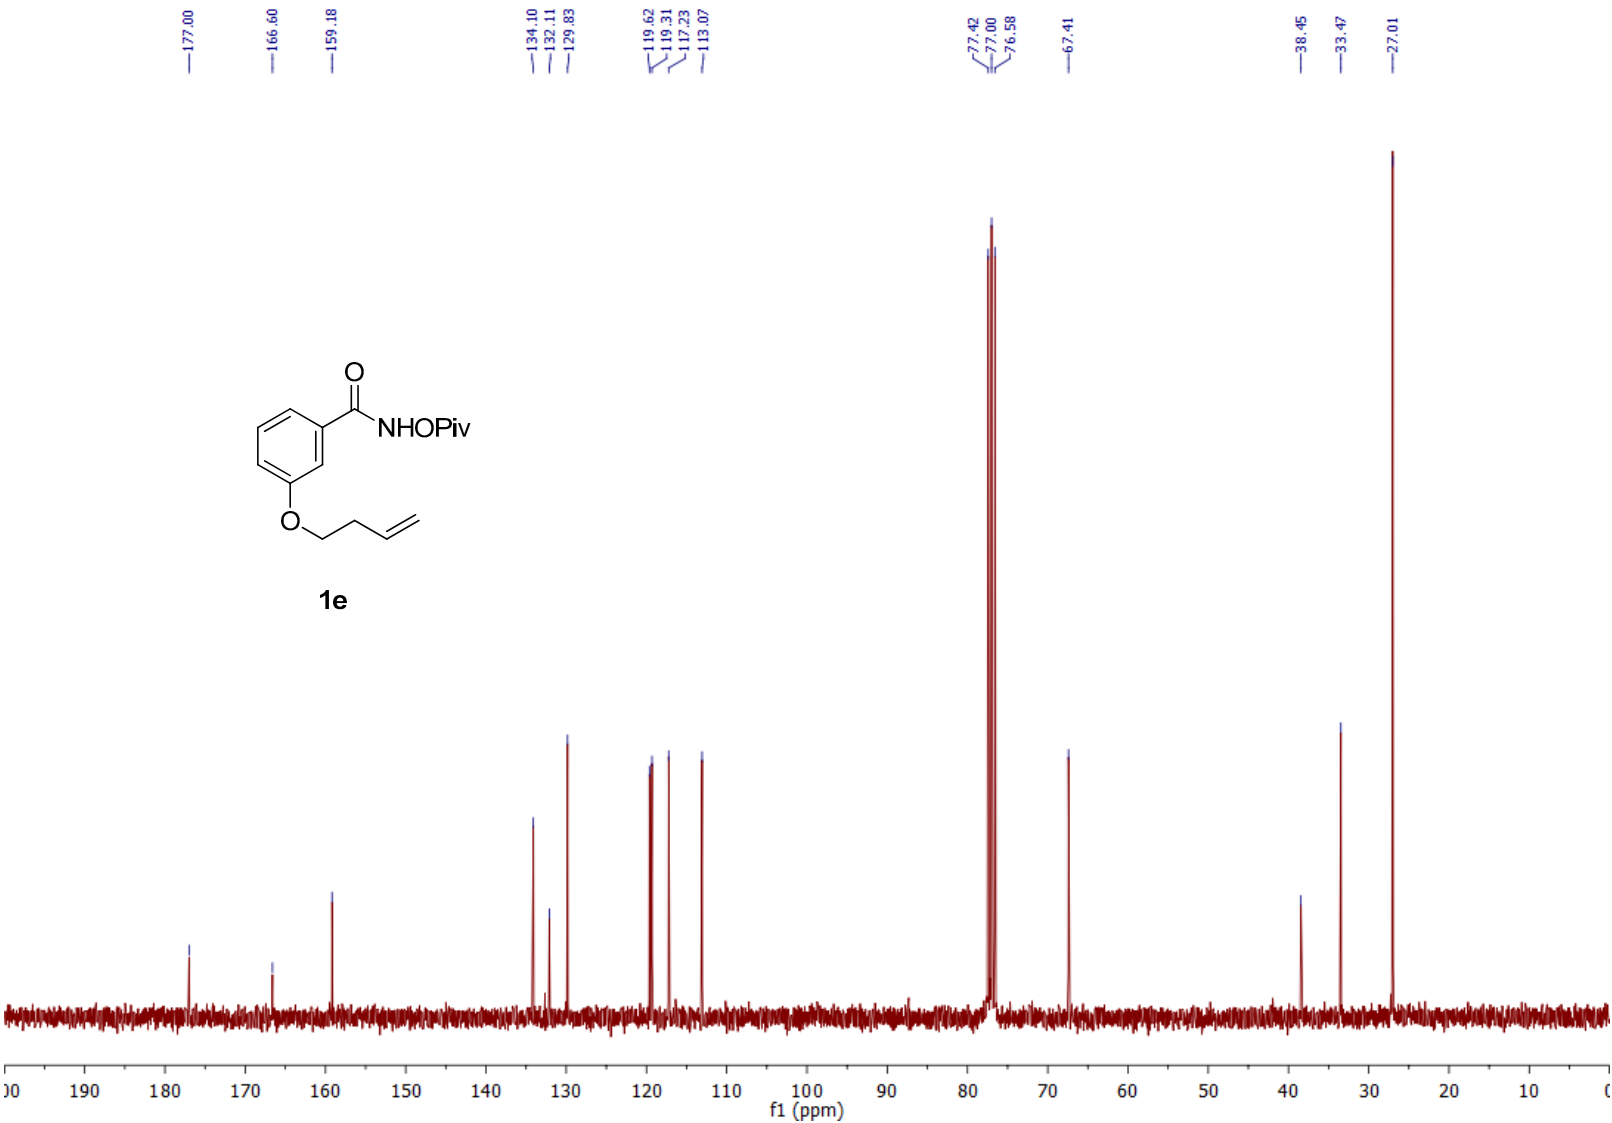

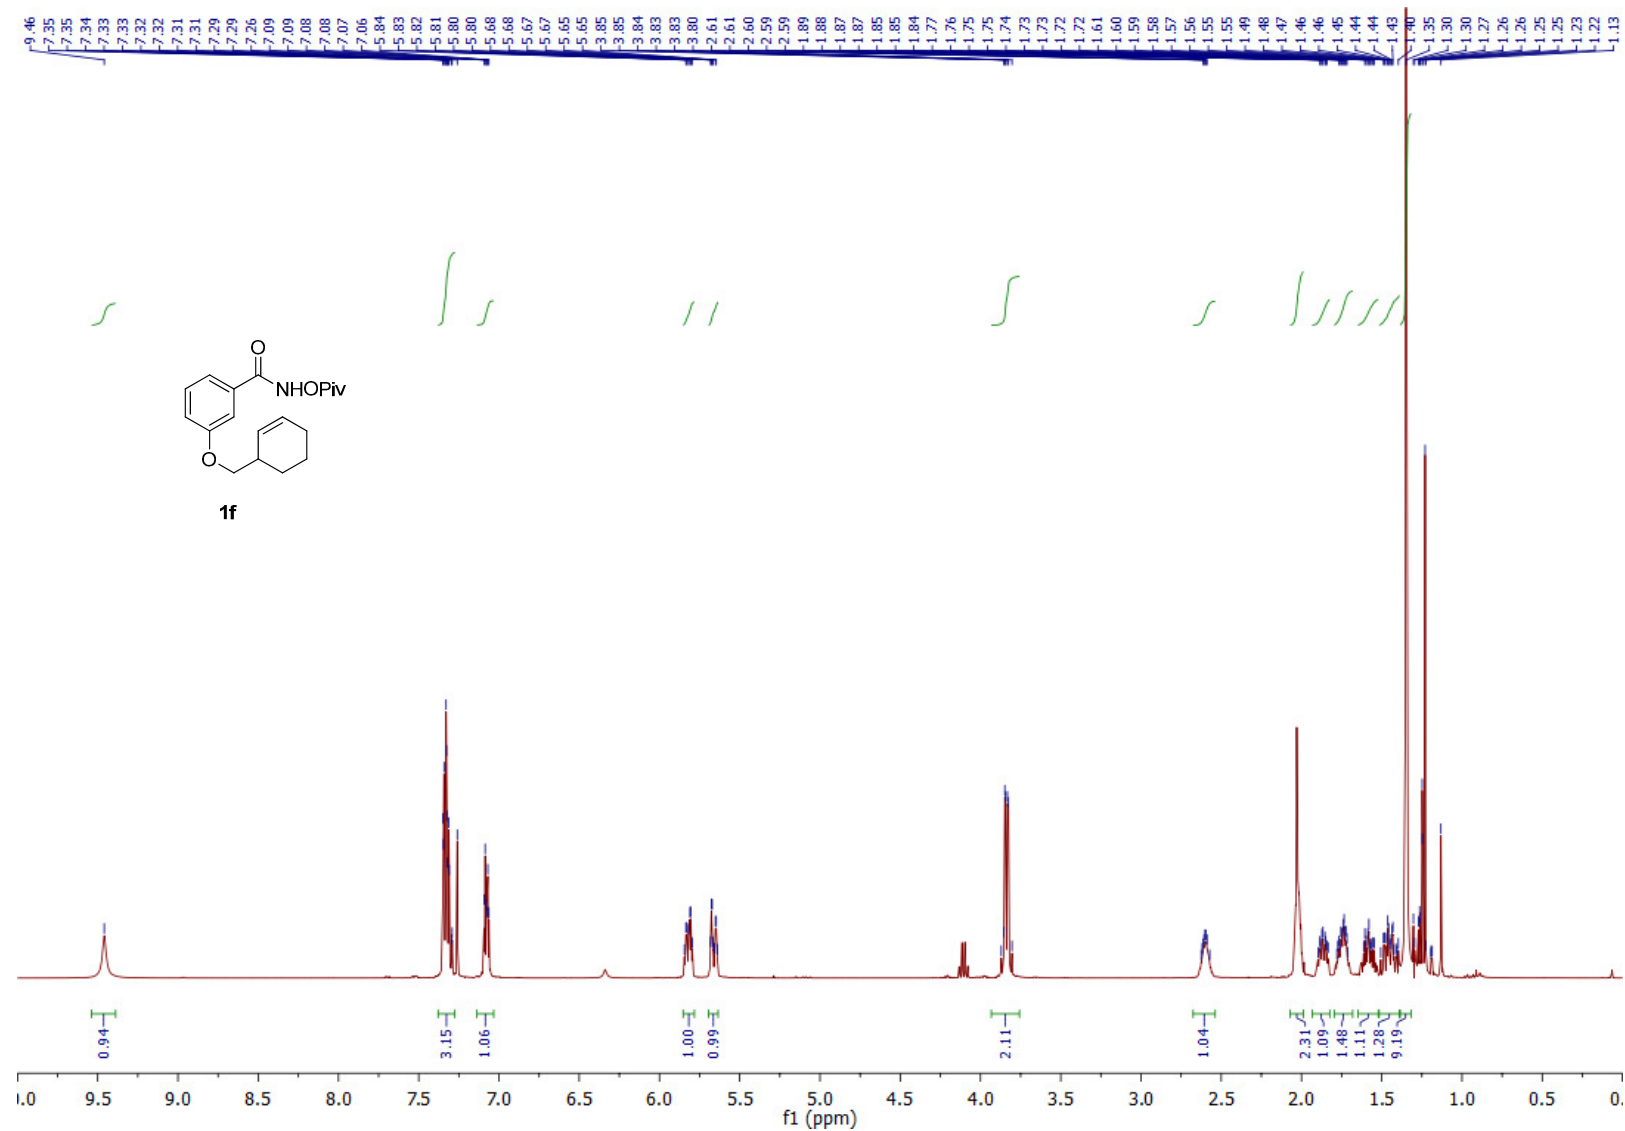

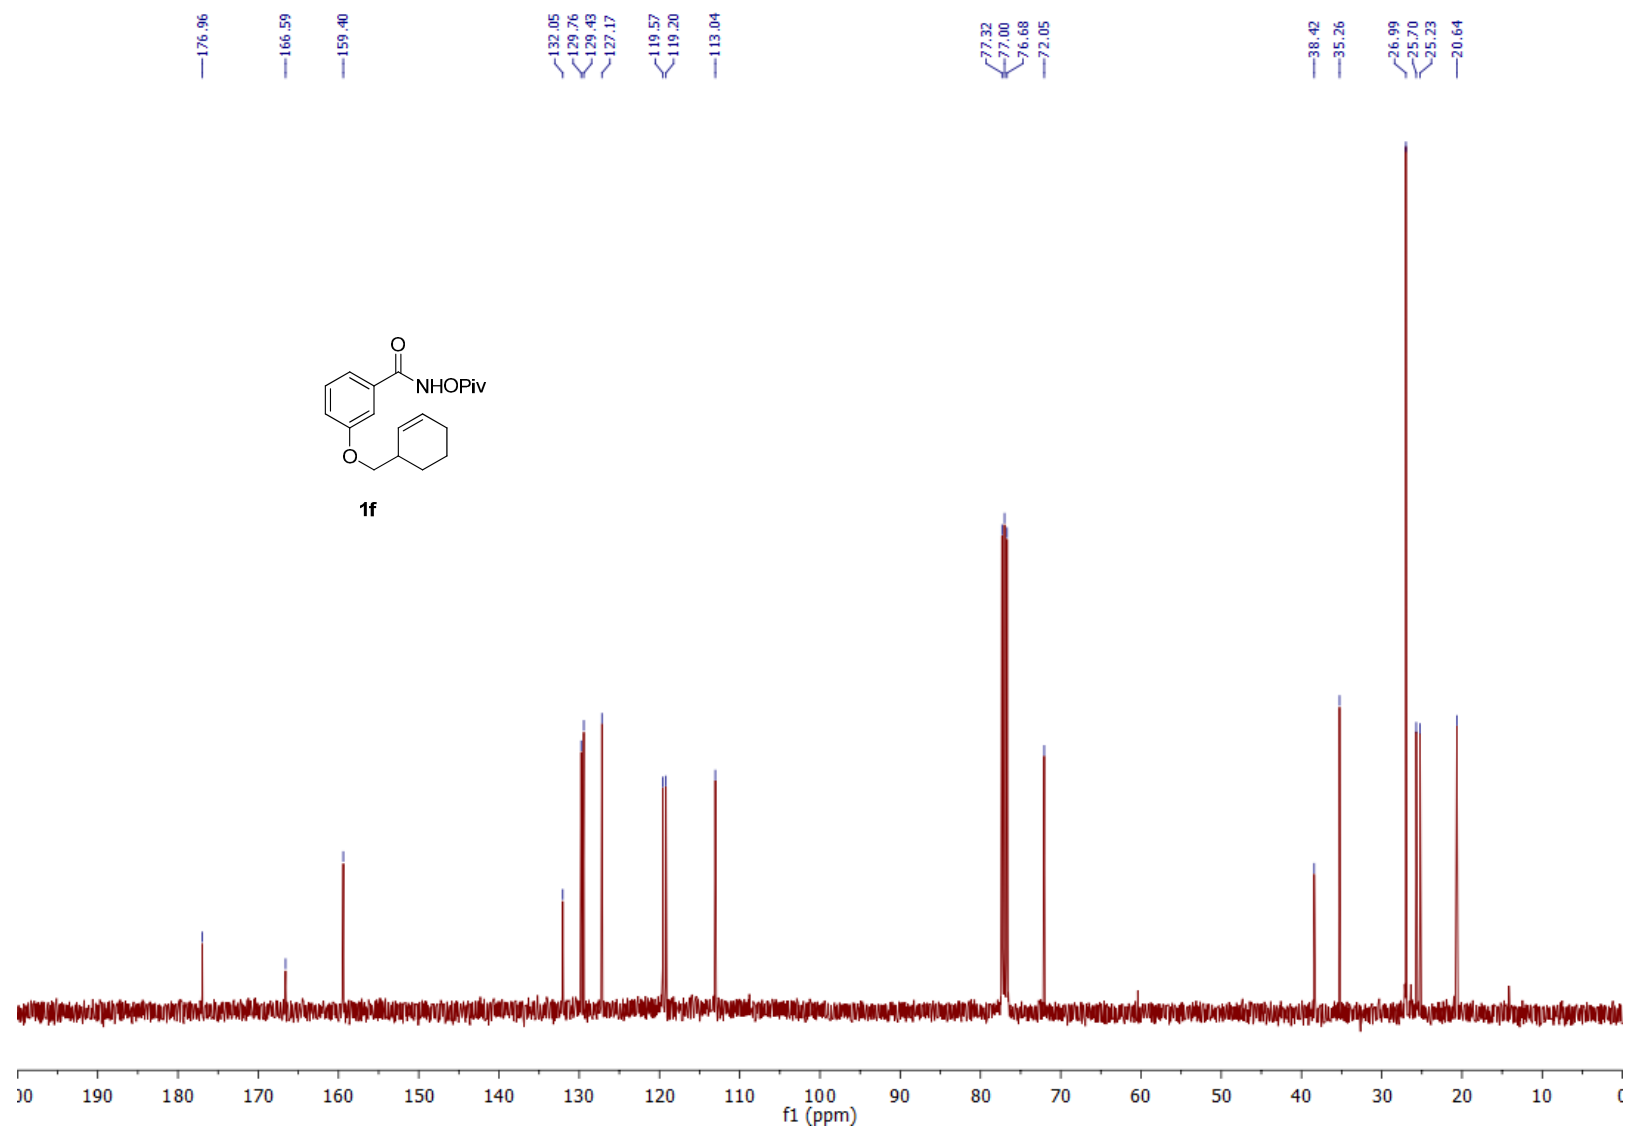

Feb22-2013.760.fid  
glo shi szz se 066  
proton CDCl3 /opt/topspin av1 27

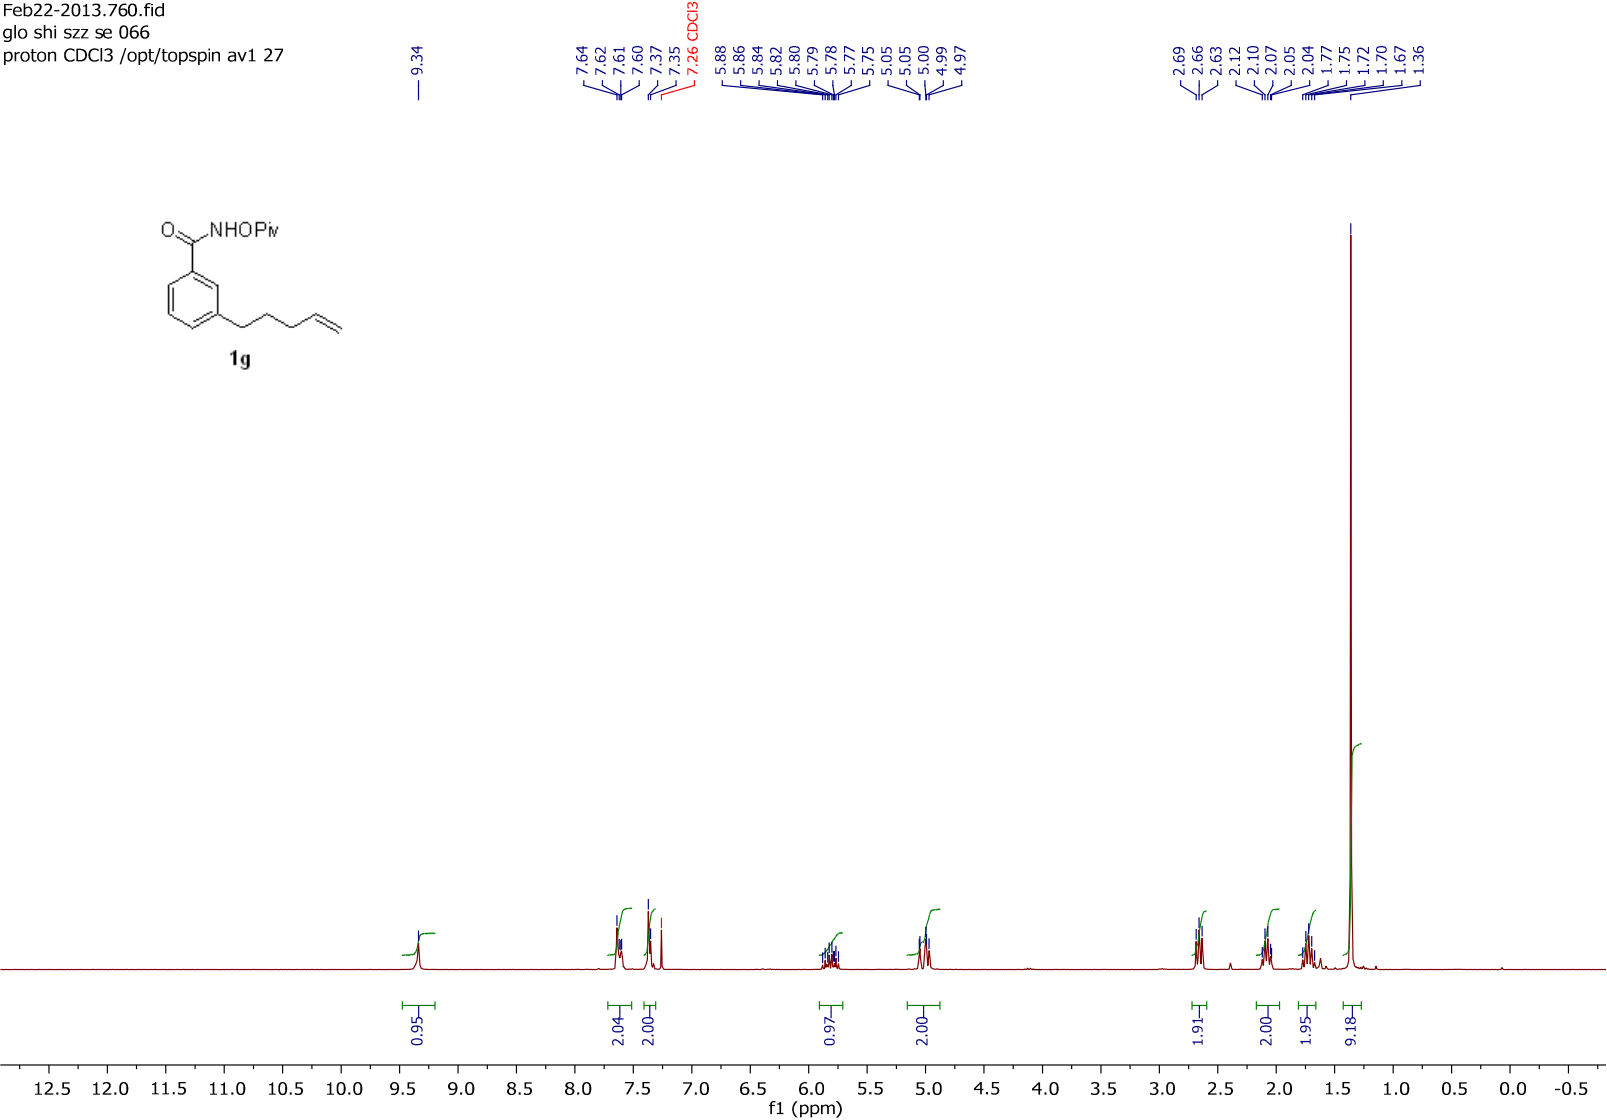



Feb22-2013.761.fid  
glo shi szz se 066  
carbon\_256 CDCl3 /opt/topspin av1 27

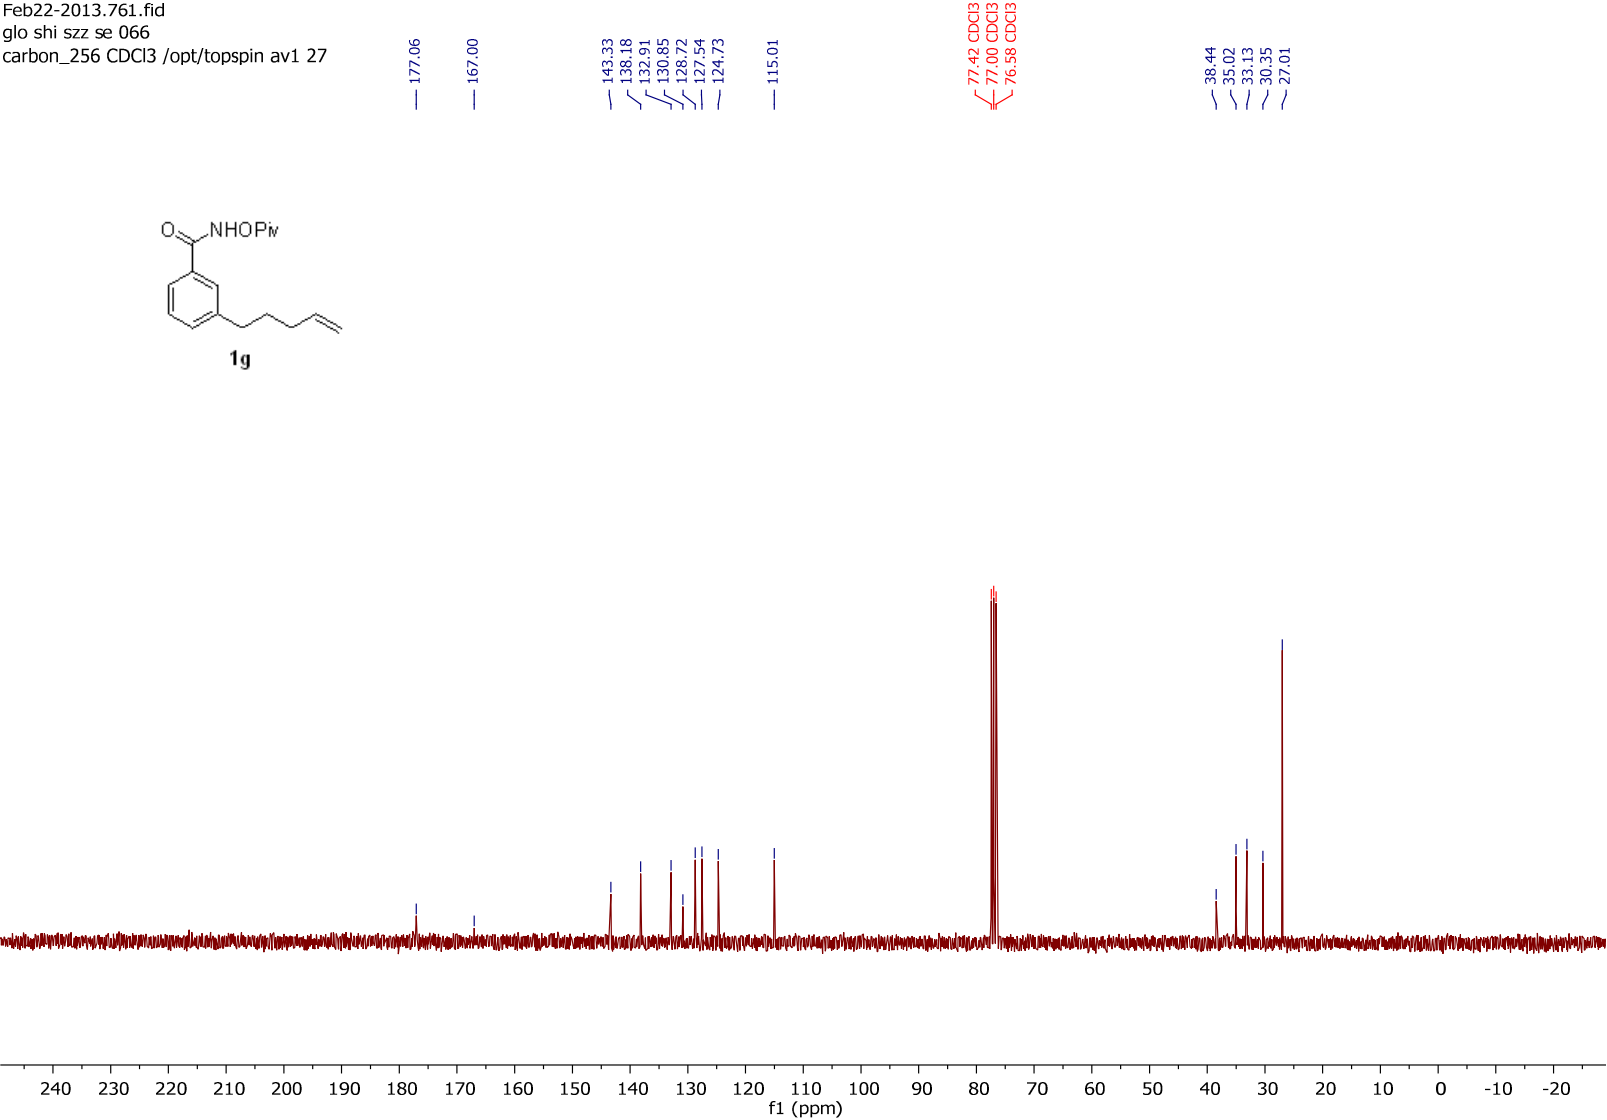

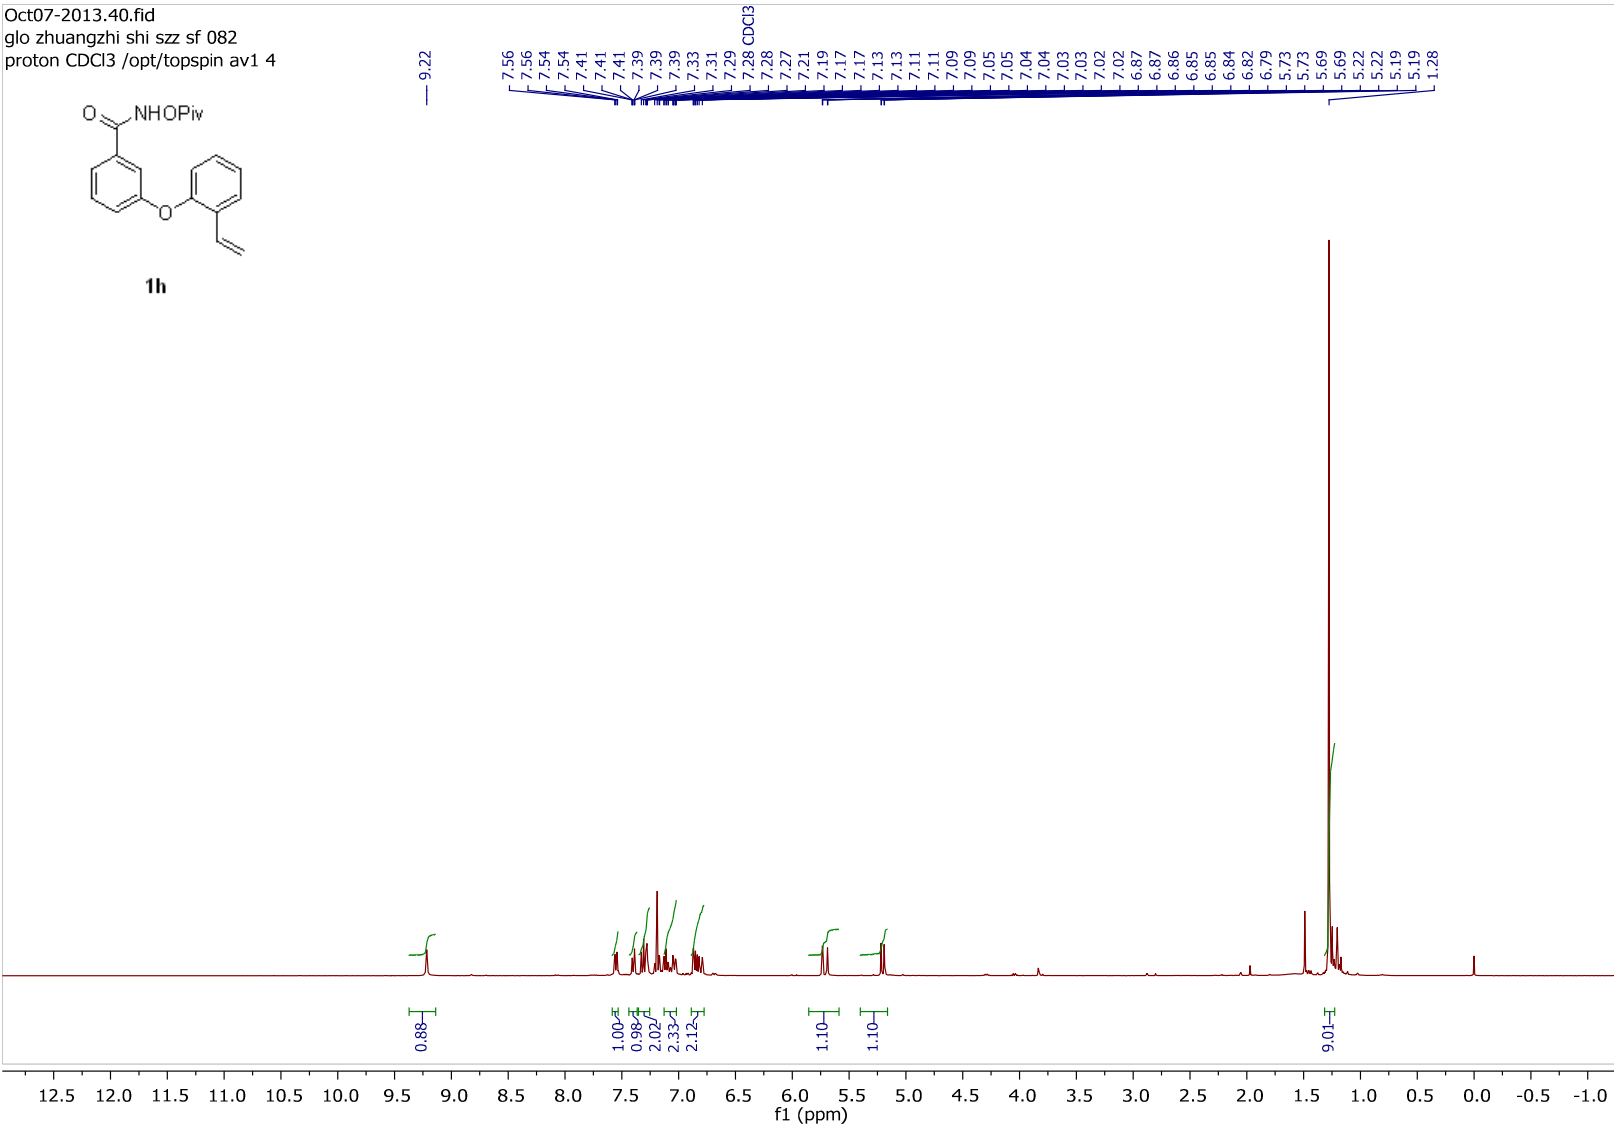

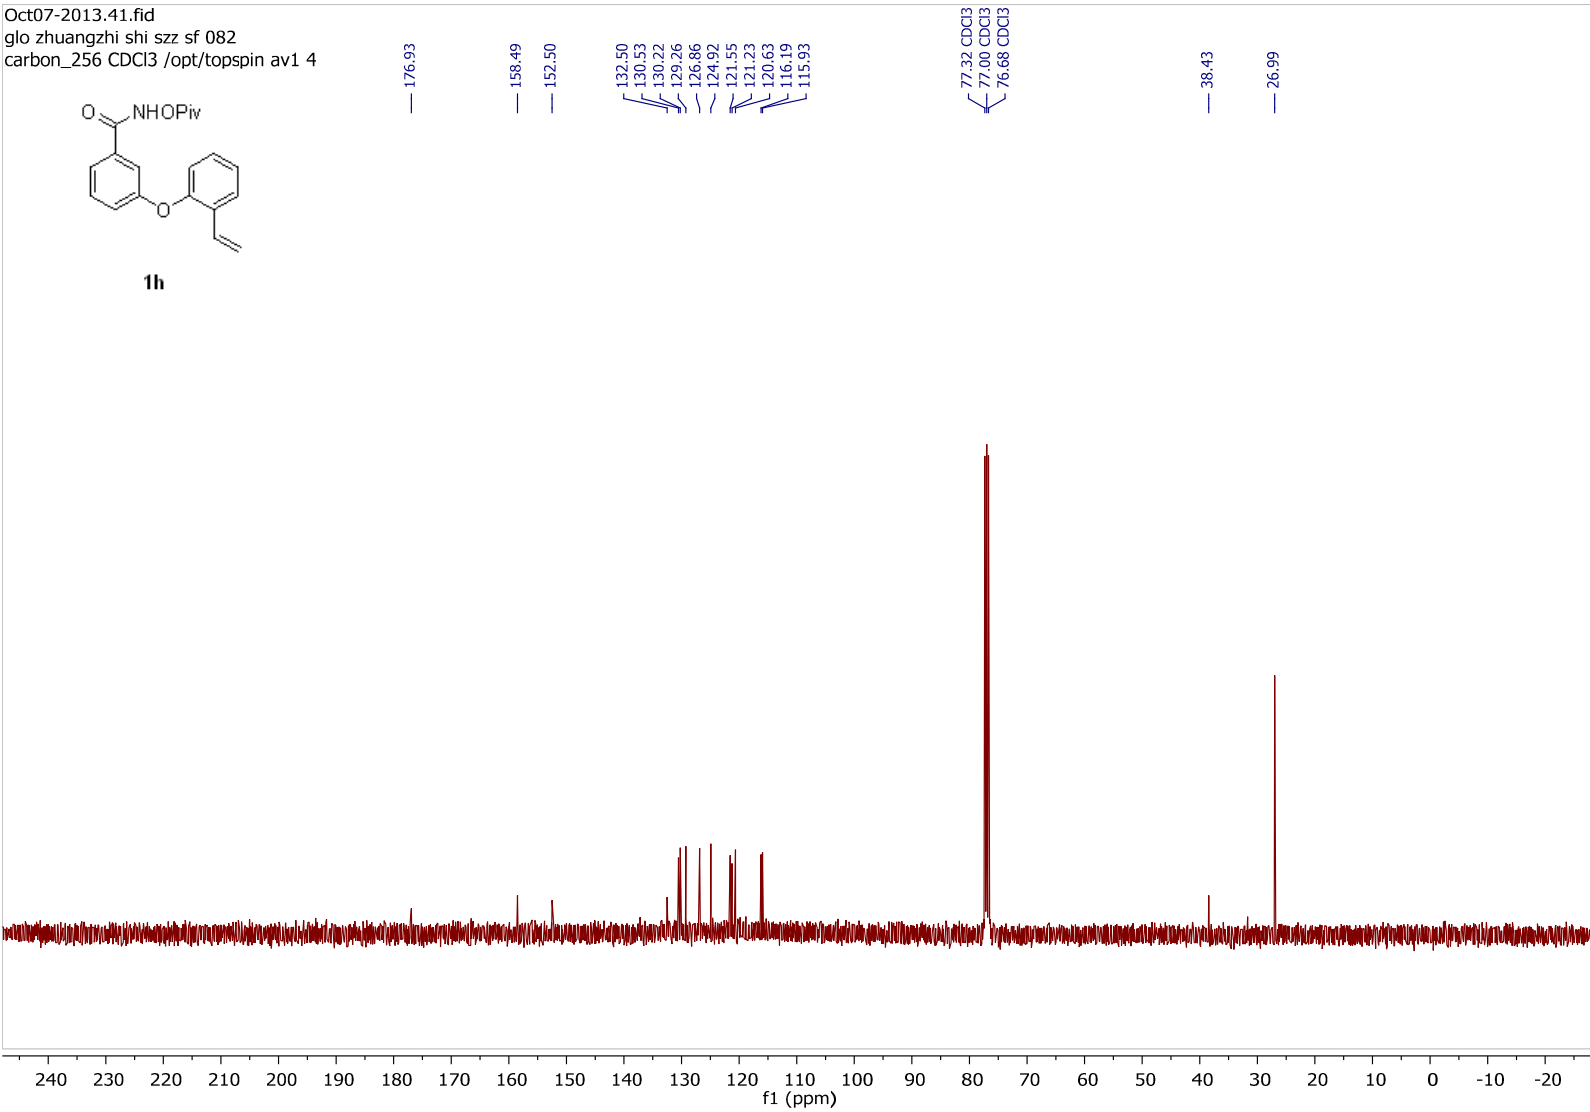

Aug14-2013.320.fid  
glo shi szz sf 072 3  
proton CDCl3 /opt/topspin av1 25

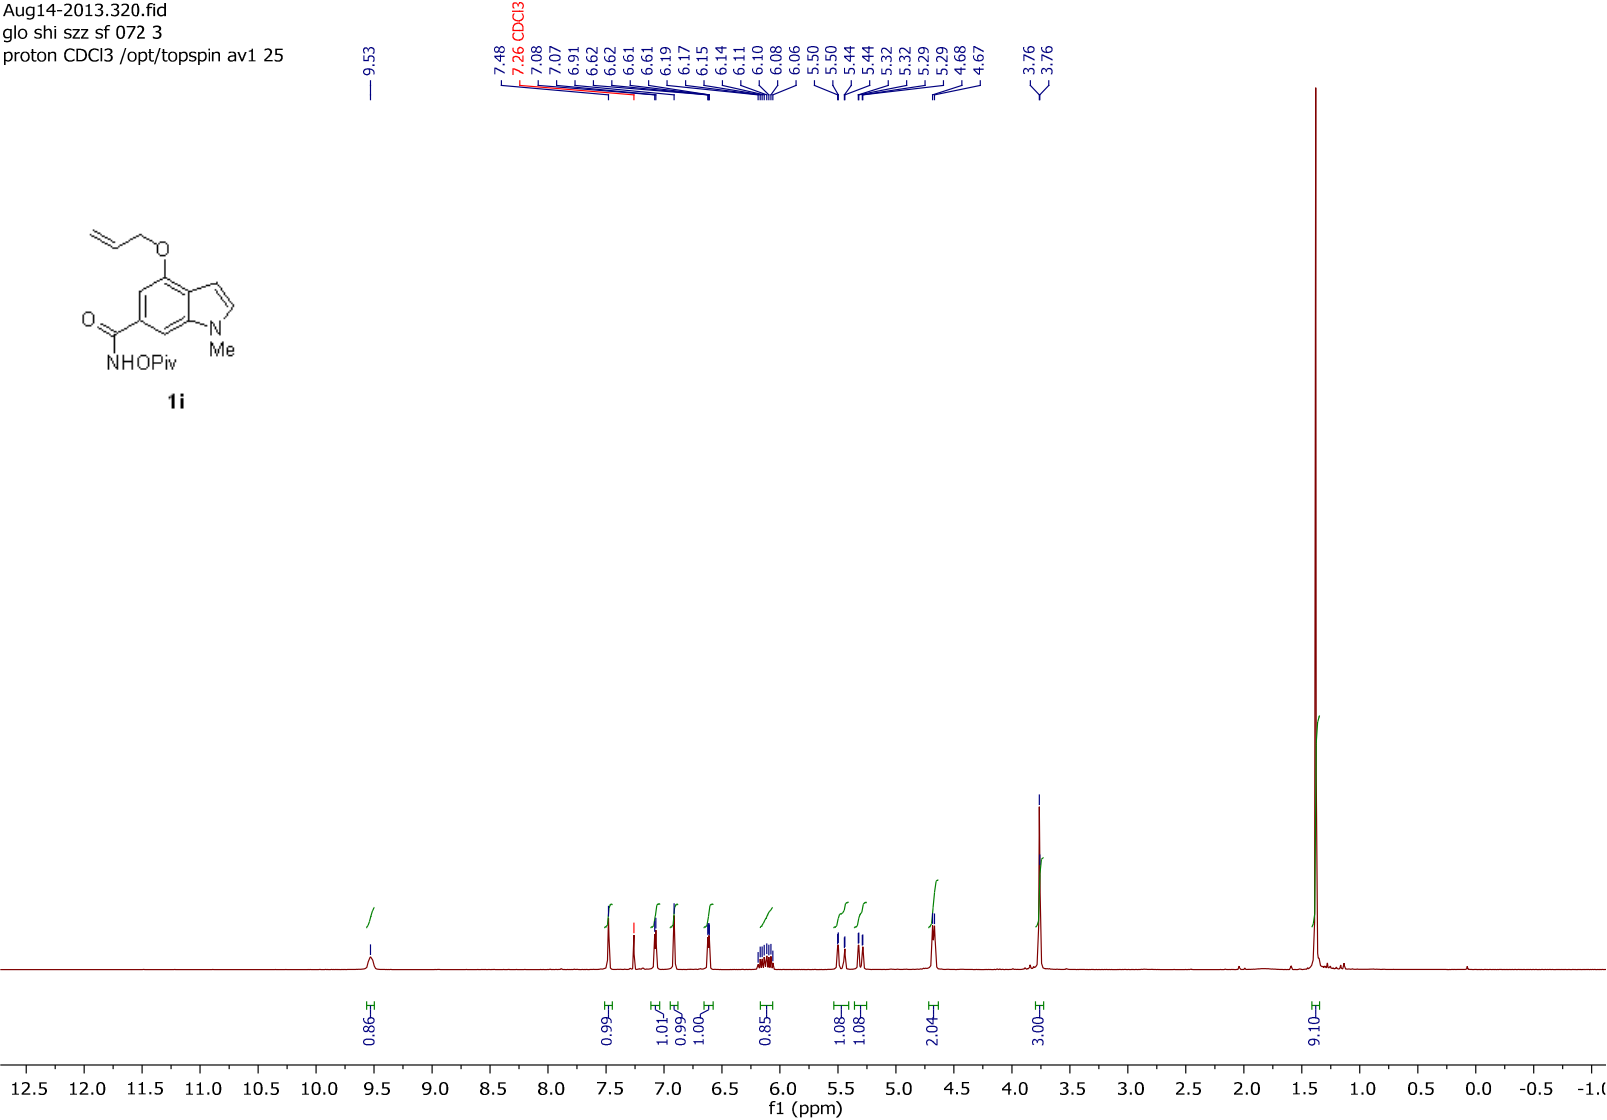

Aug14-2013.321.fid  
glo shi szz sf 072 3  
carbon\_256 CDCl3 /opt/topspin av1 25

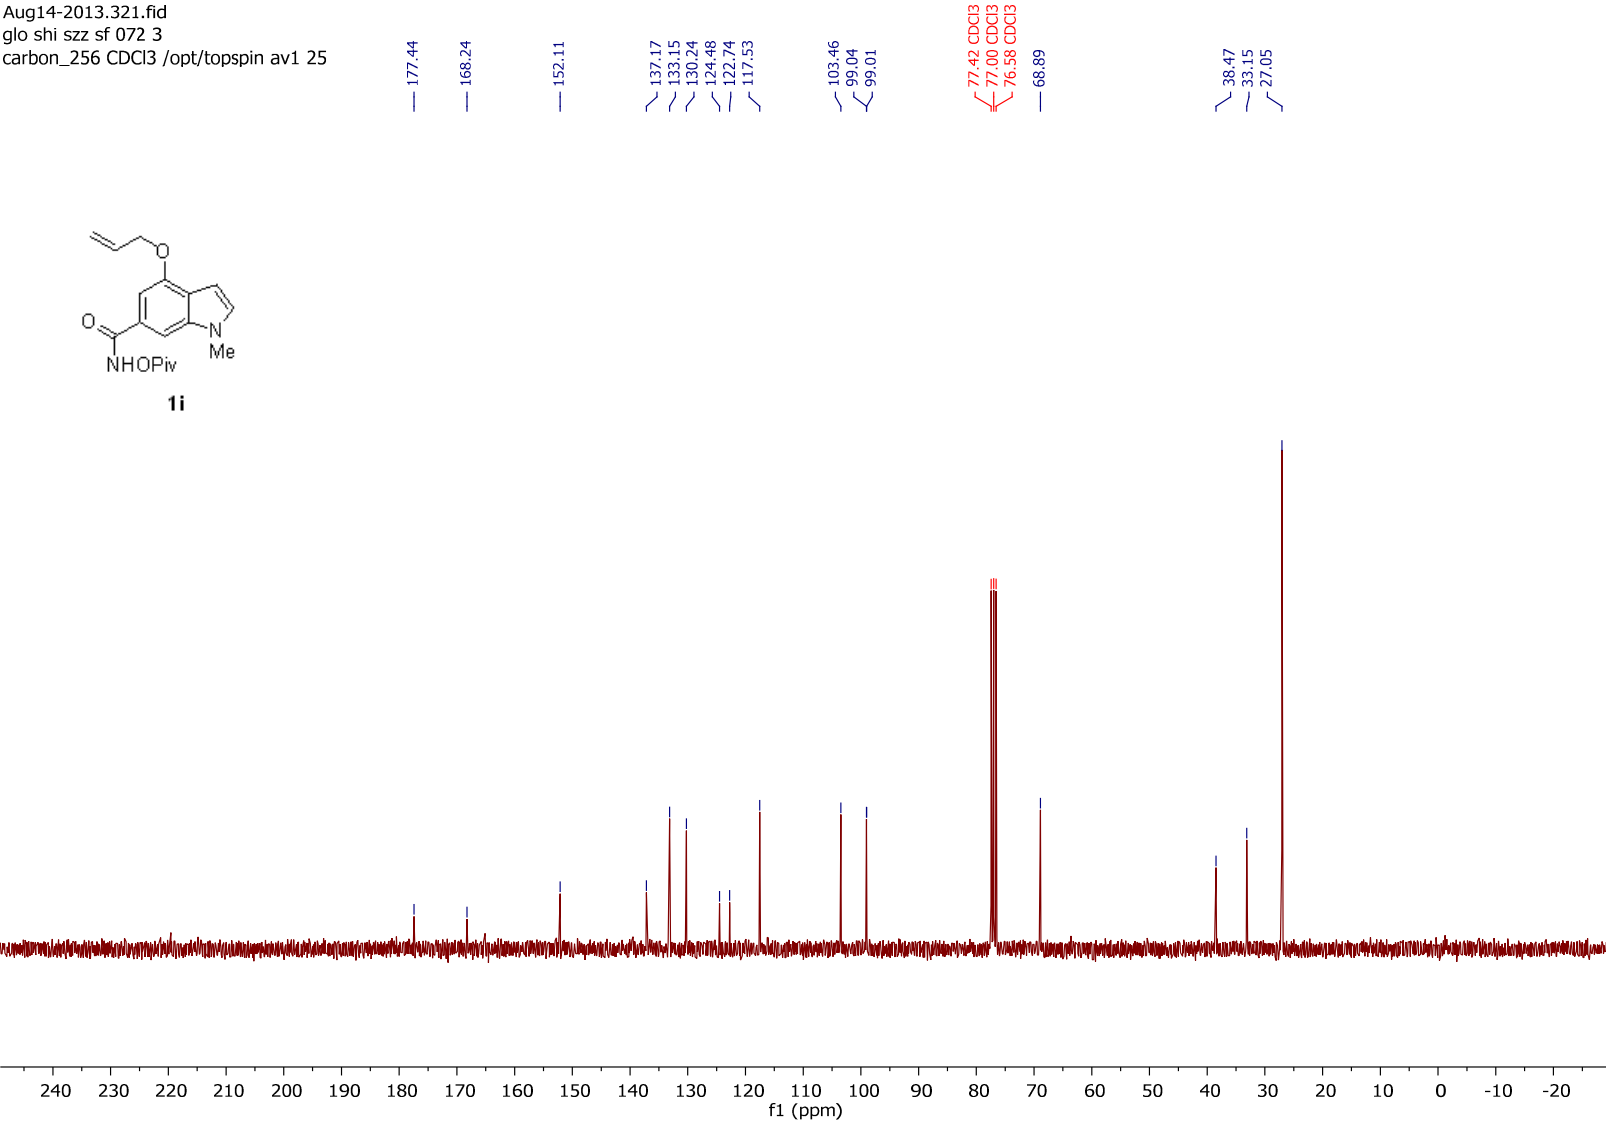

Oct09-2013.100.fid  
glo shi szz sf 091 4  
proton CDCl3 /opt/topspin av1.27

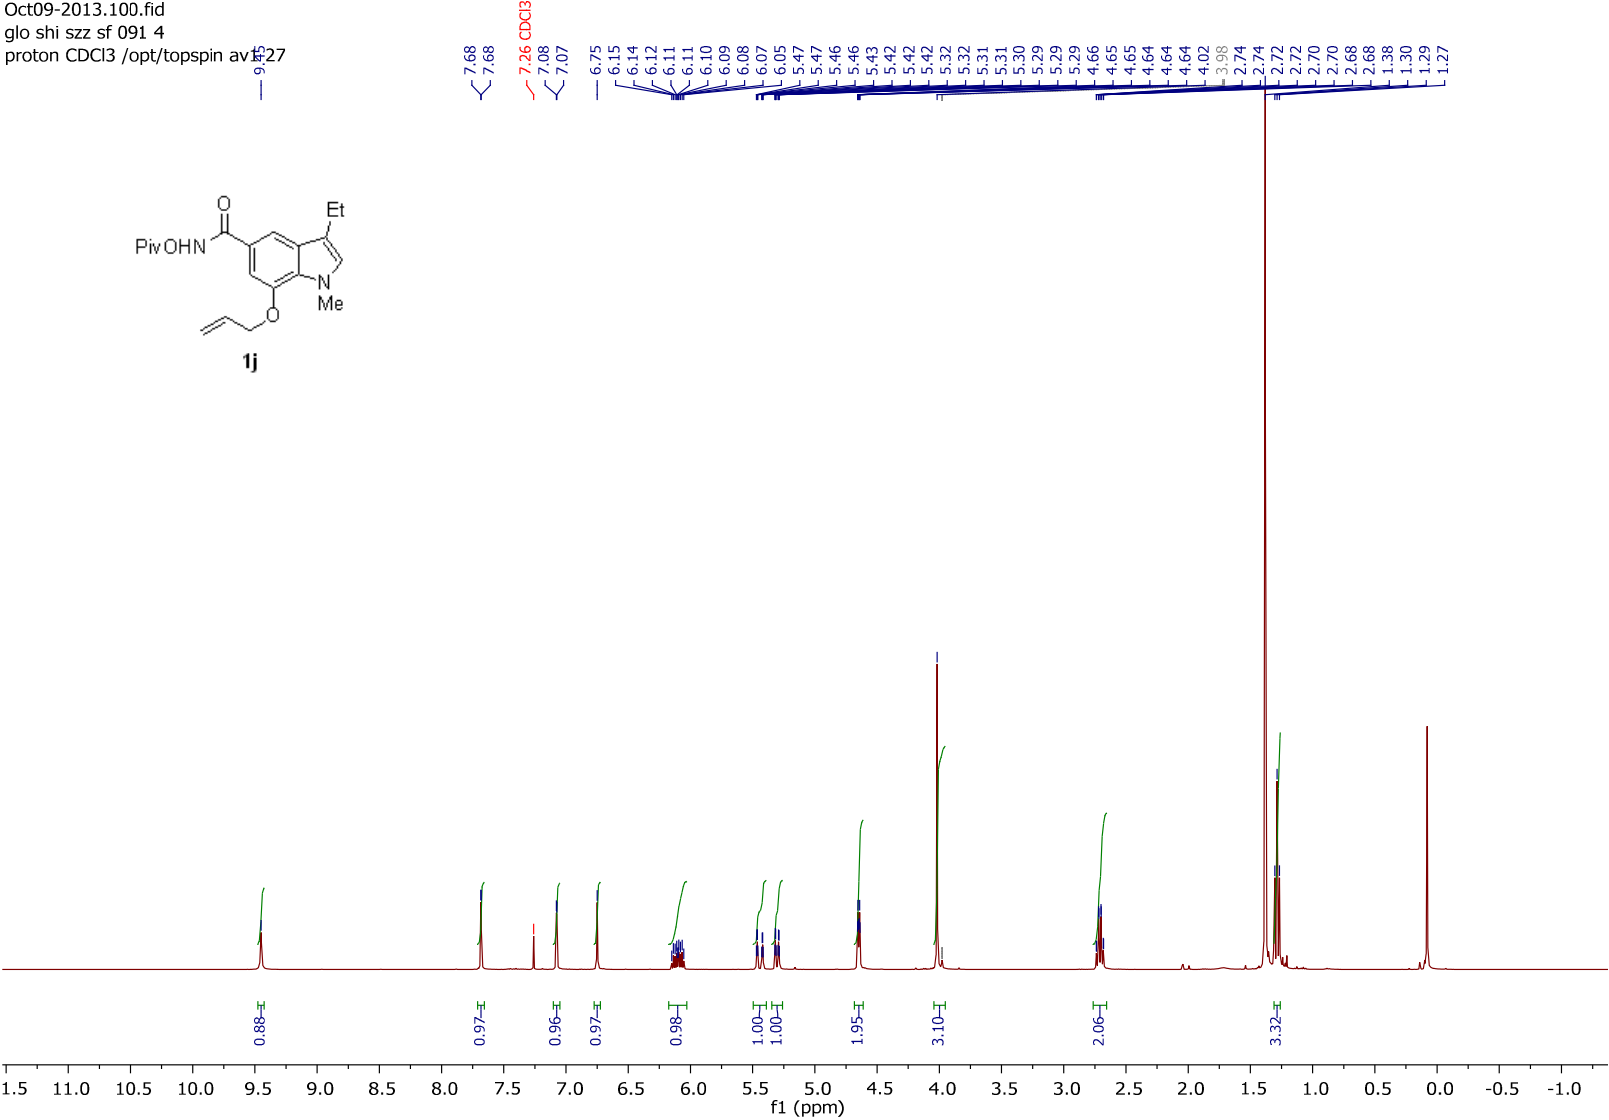

Oct09-2013.101.fid  
glo shi szz sf 091 4  
carbon\_256 CDCl3 /opt/topspin av1 27

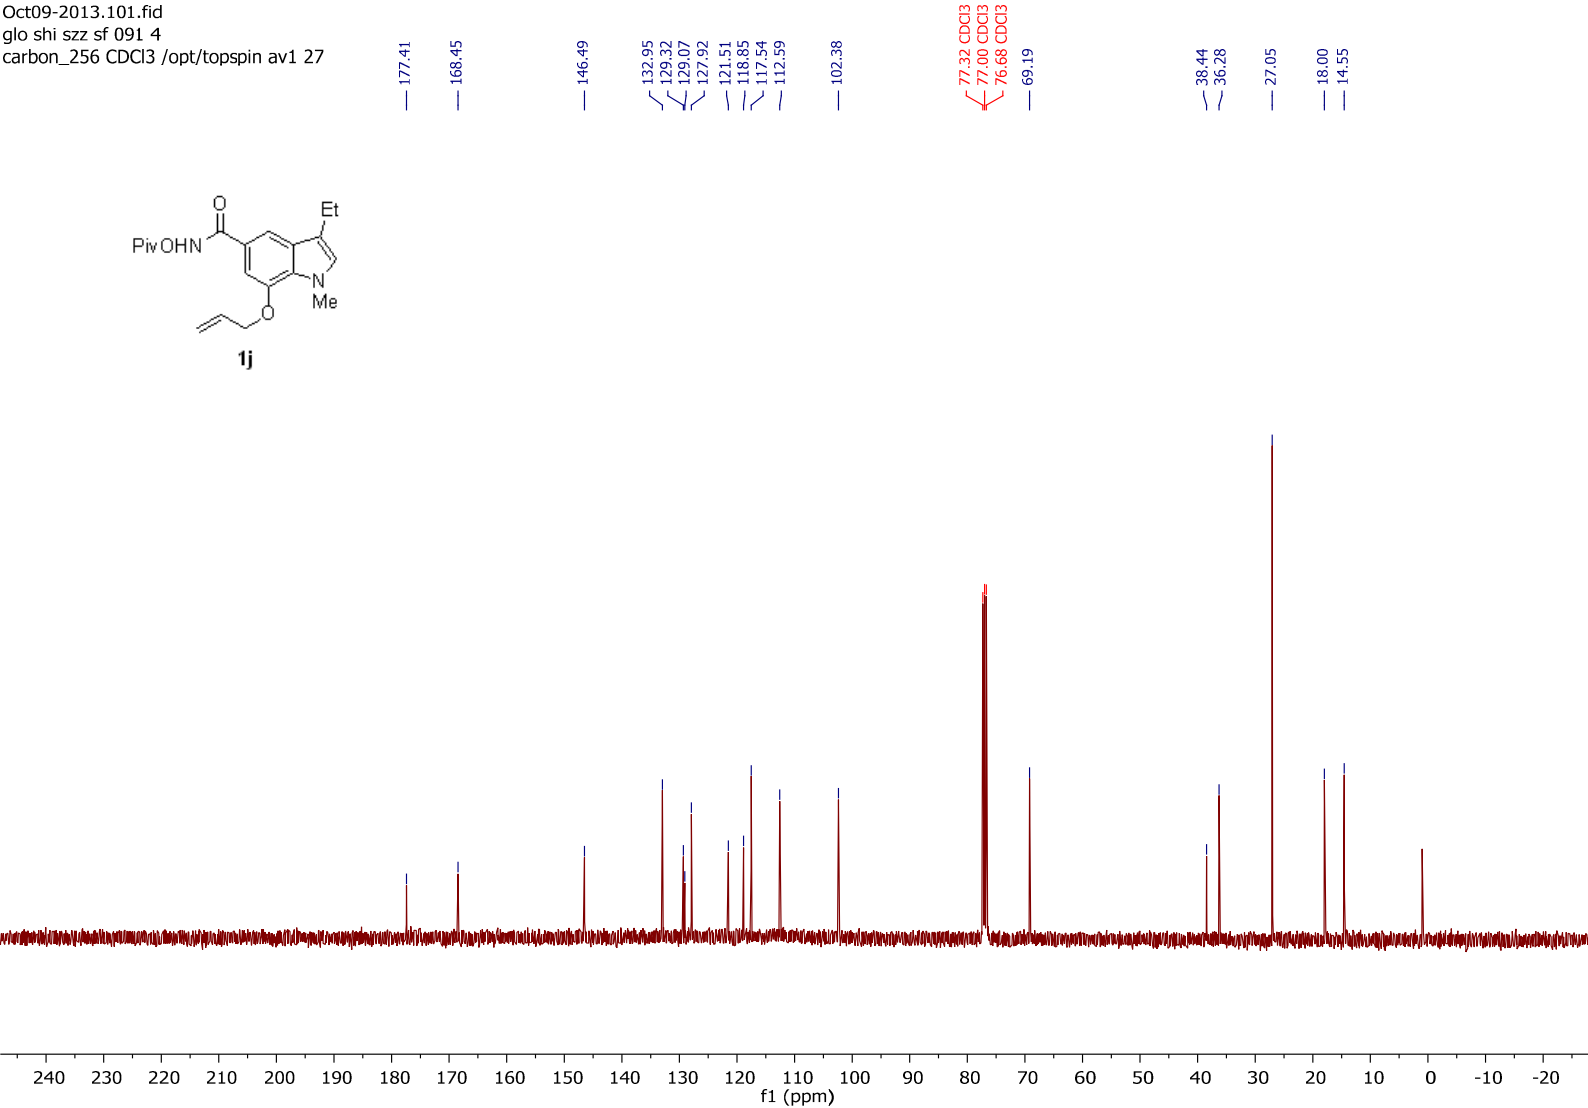

Jul29-2013.450.fid  
glo shi szz sf 051  
proton CDCl3 /opt/topspin av1 15

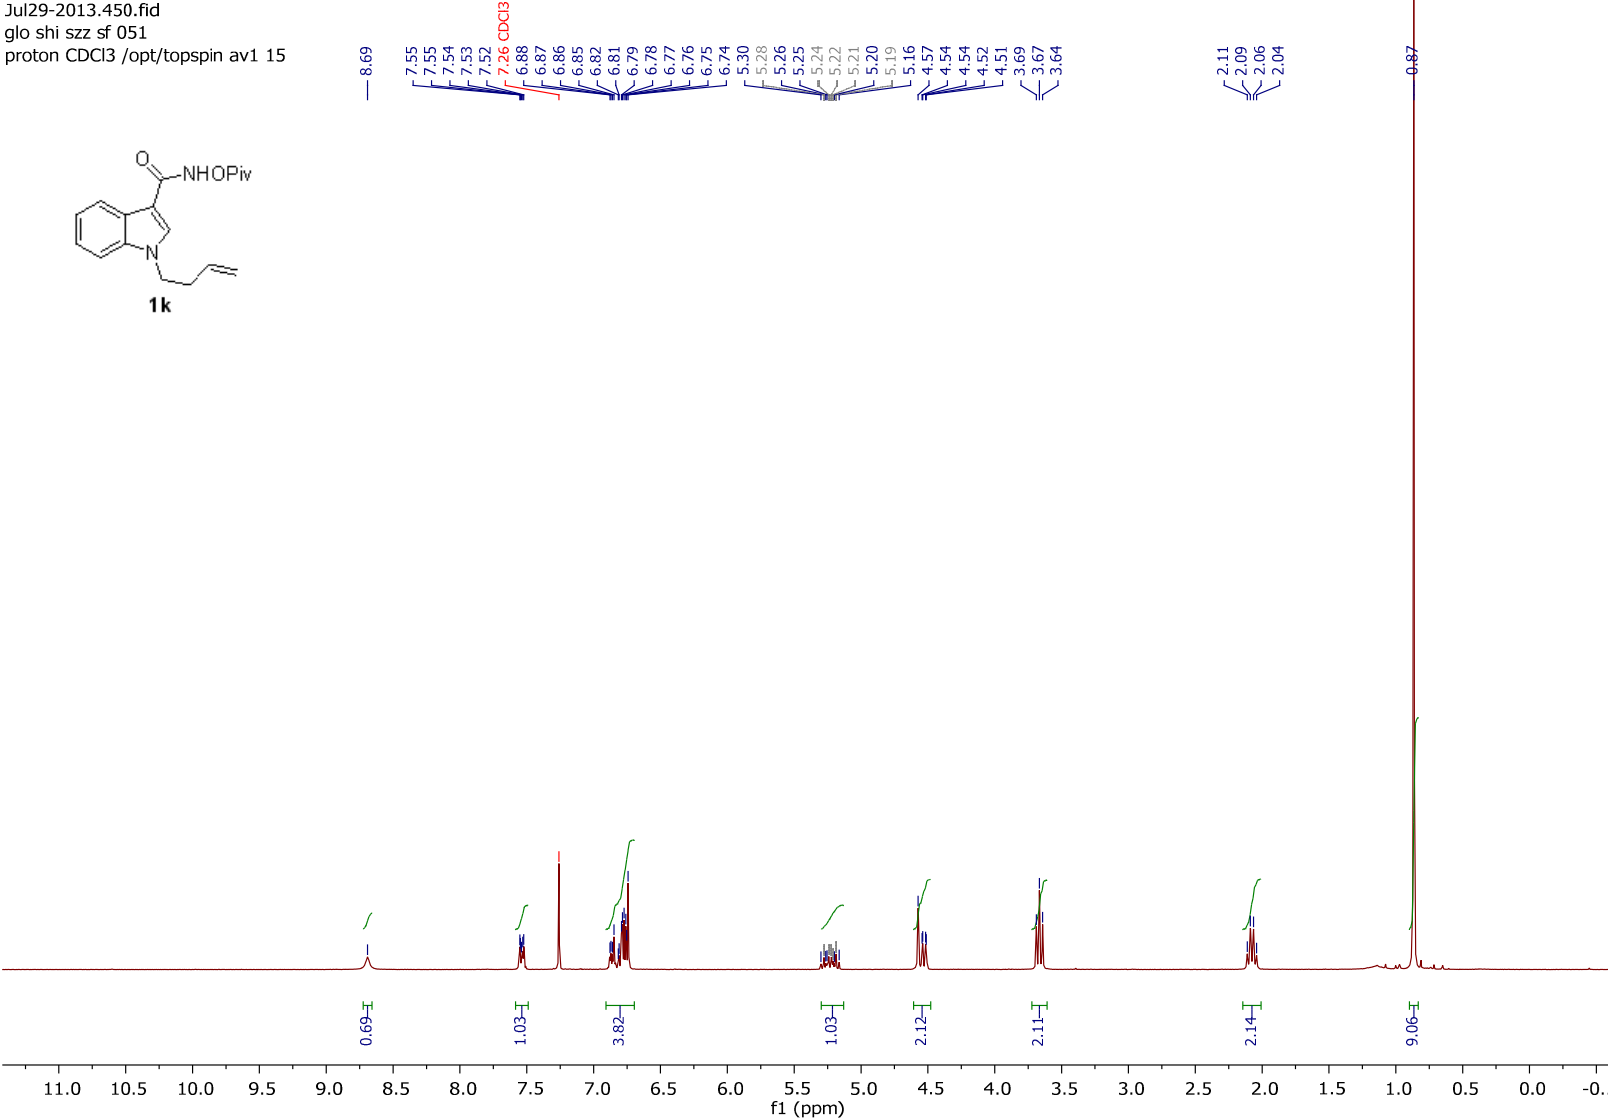



Jul29-2013.451.fid  
glo shi szz sf 051  
carbon\_256 CDCl3 /opt/topspin av1 15

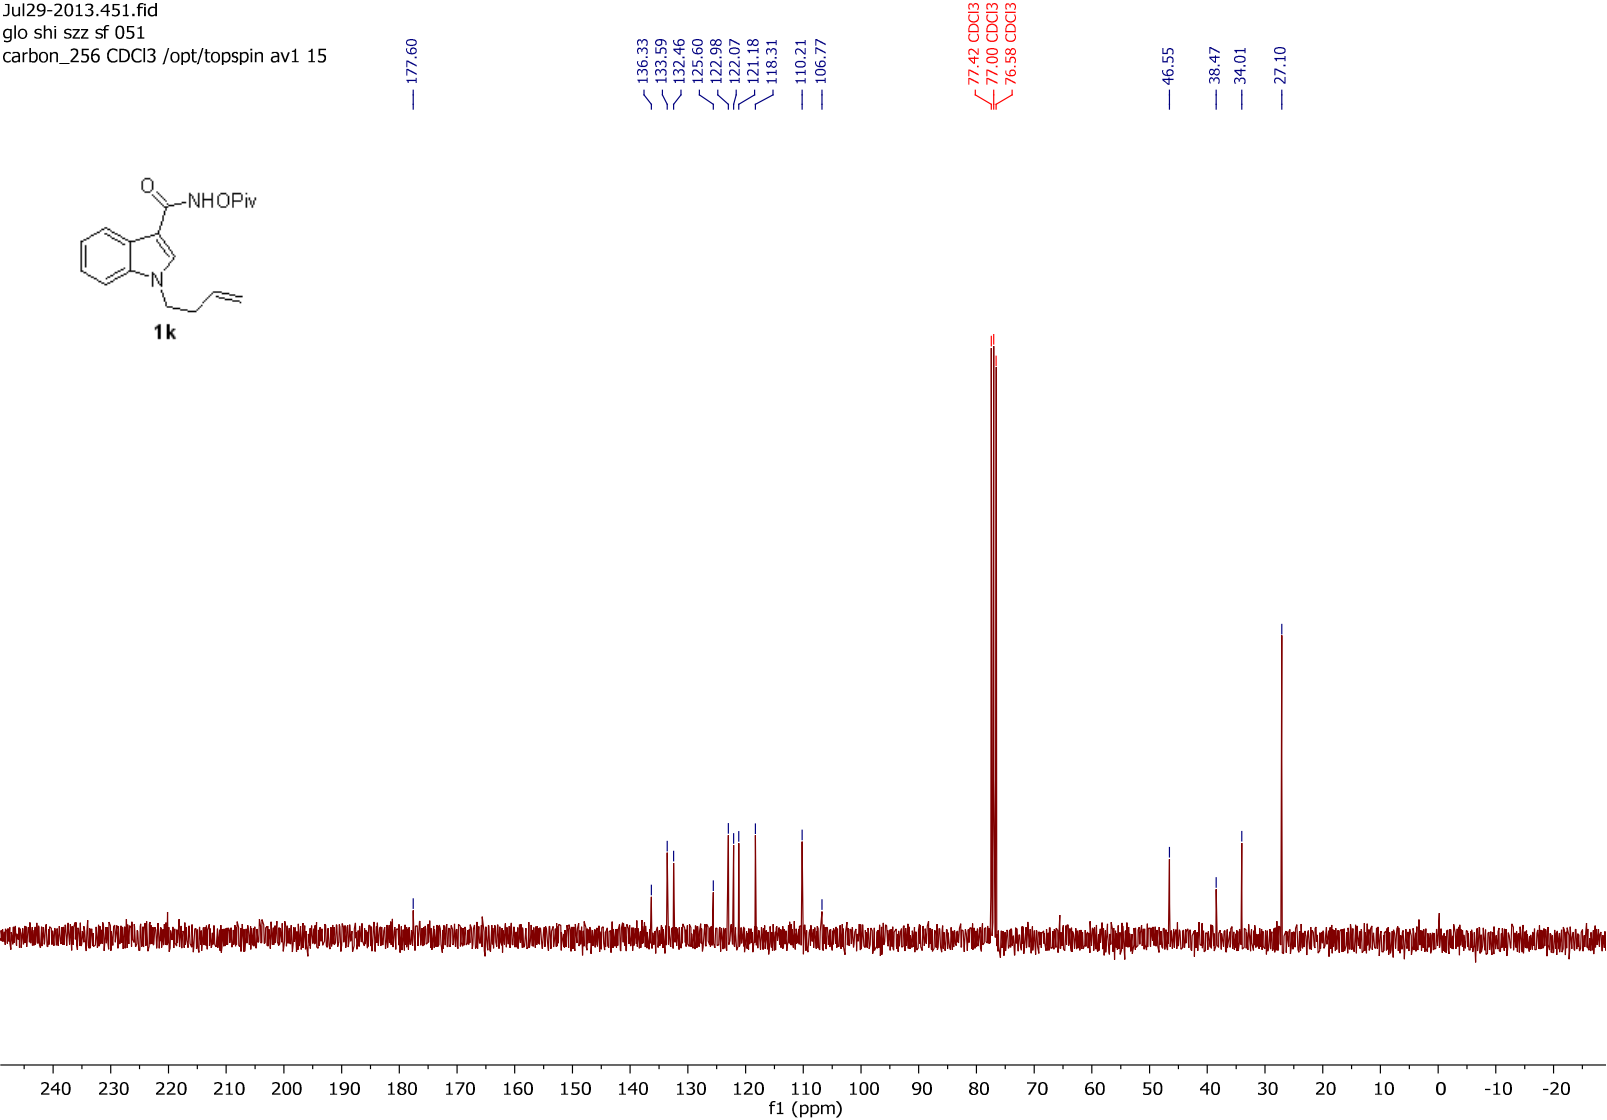

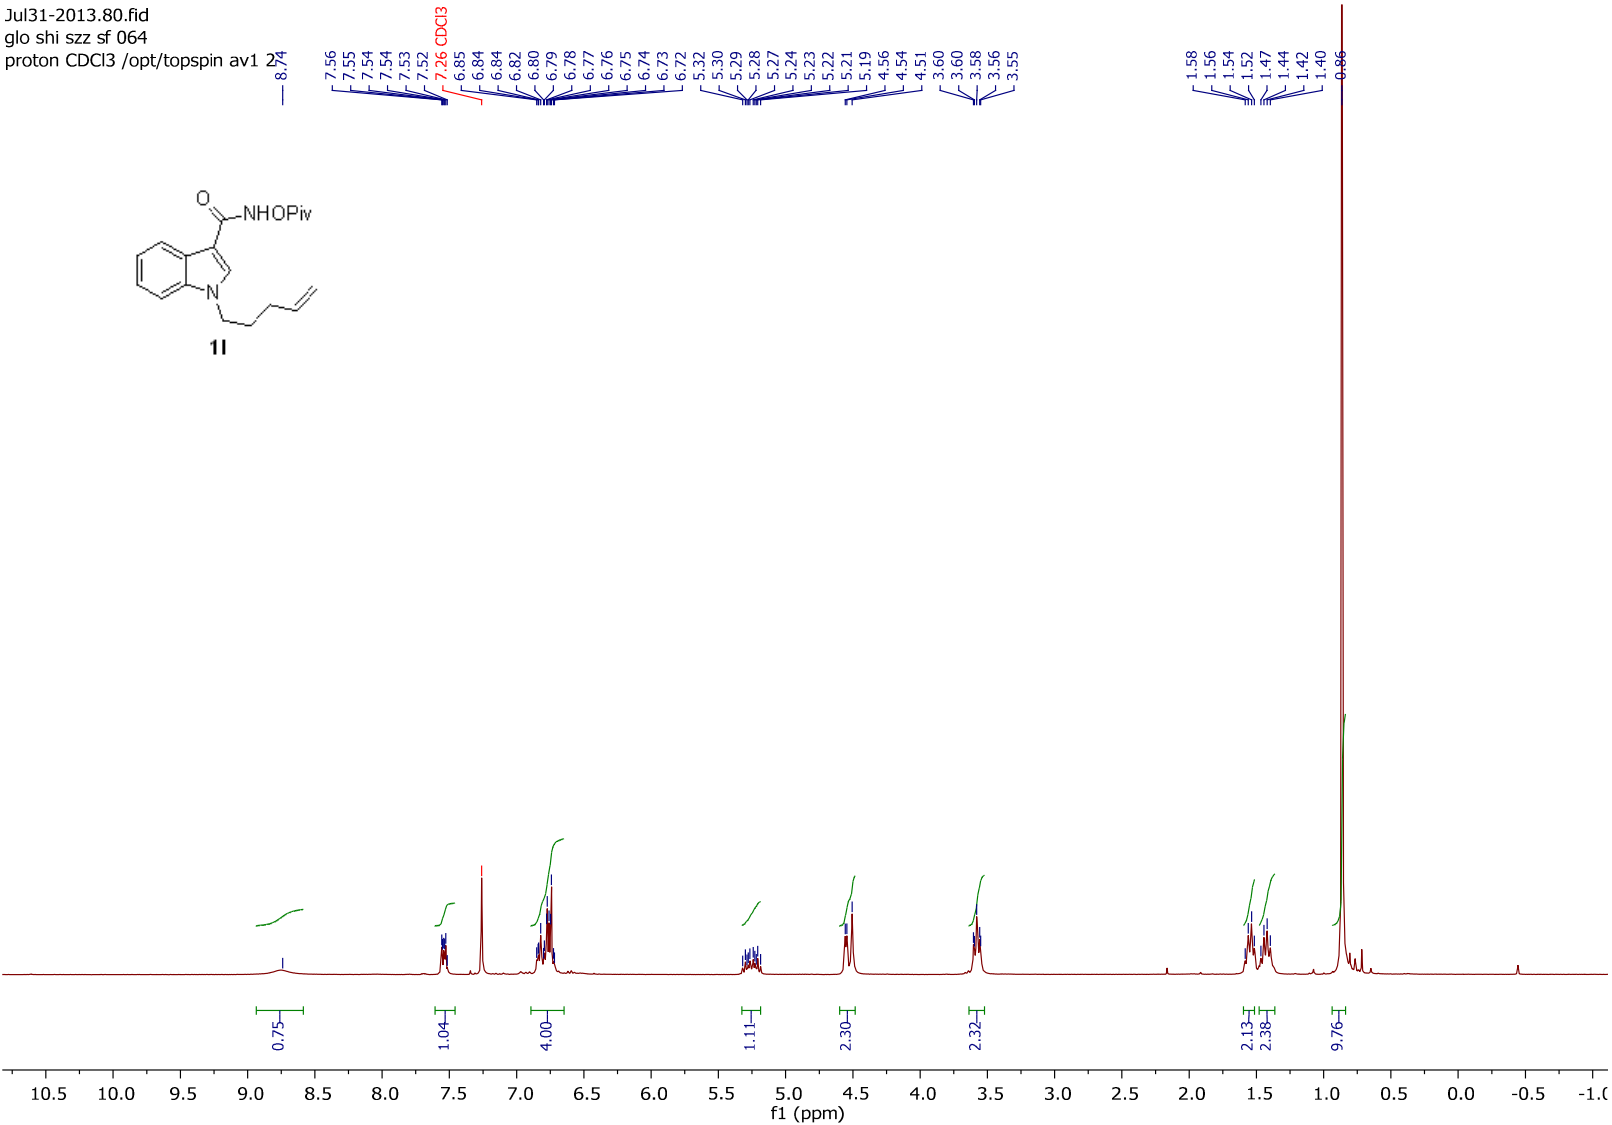

Jul31-2013.81.fid  
glo shi szz sf 064  
carbon\_256 CDCl3 /opt/topspin av1 2

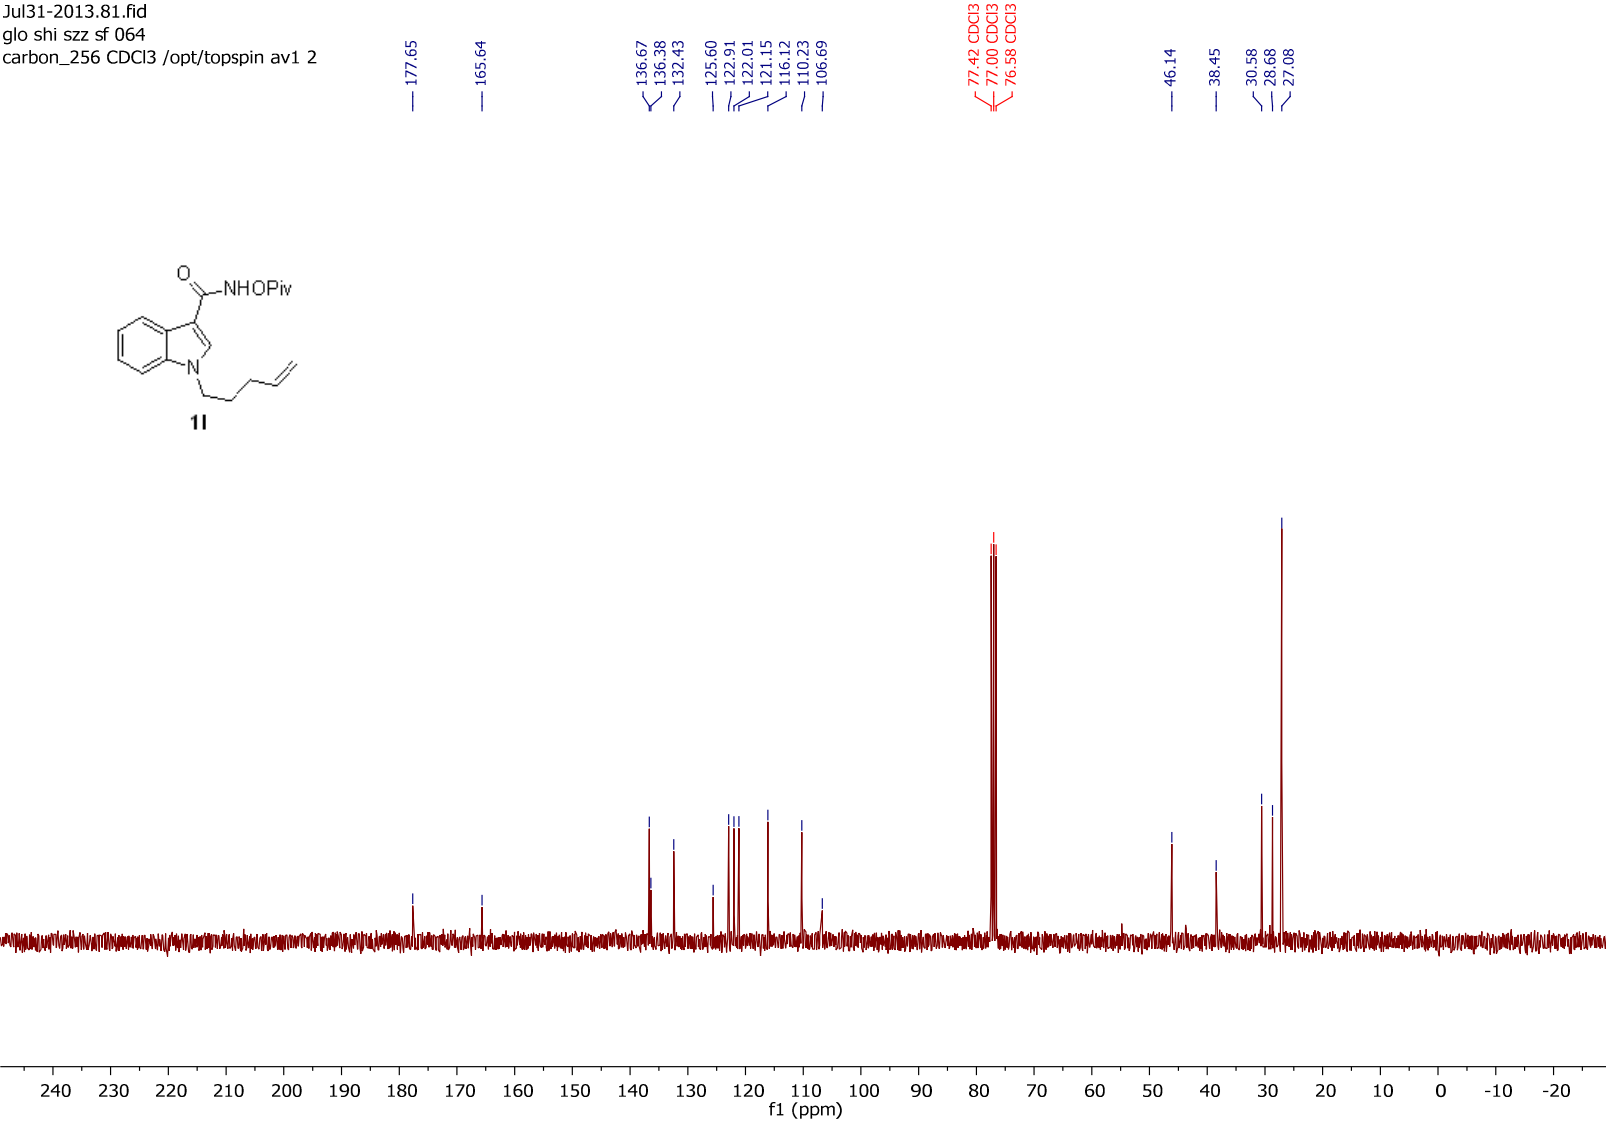

Nov25-2013.30.fid  
glo zhuangzhi shi szz sf 3a  
proton CDCl3 /opt/topspin av1 2.40

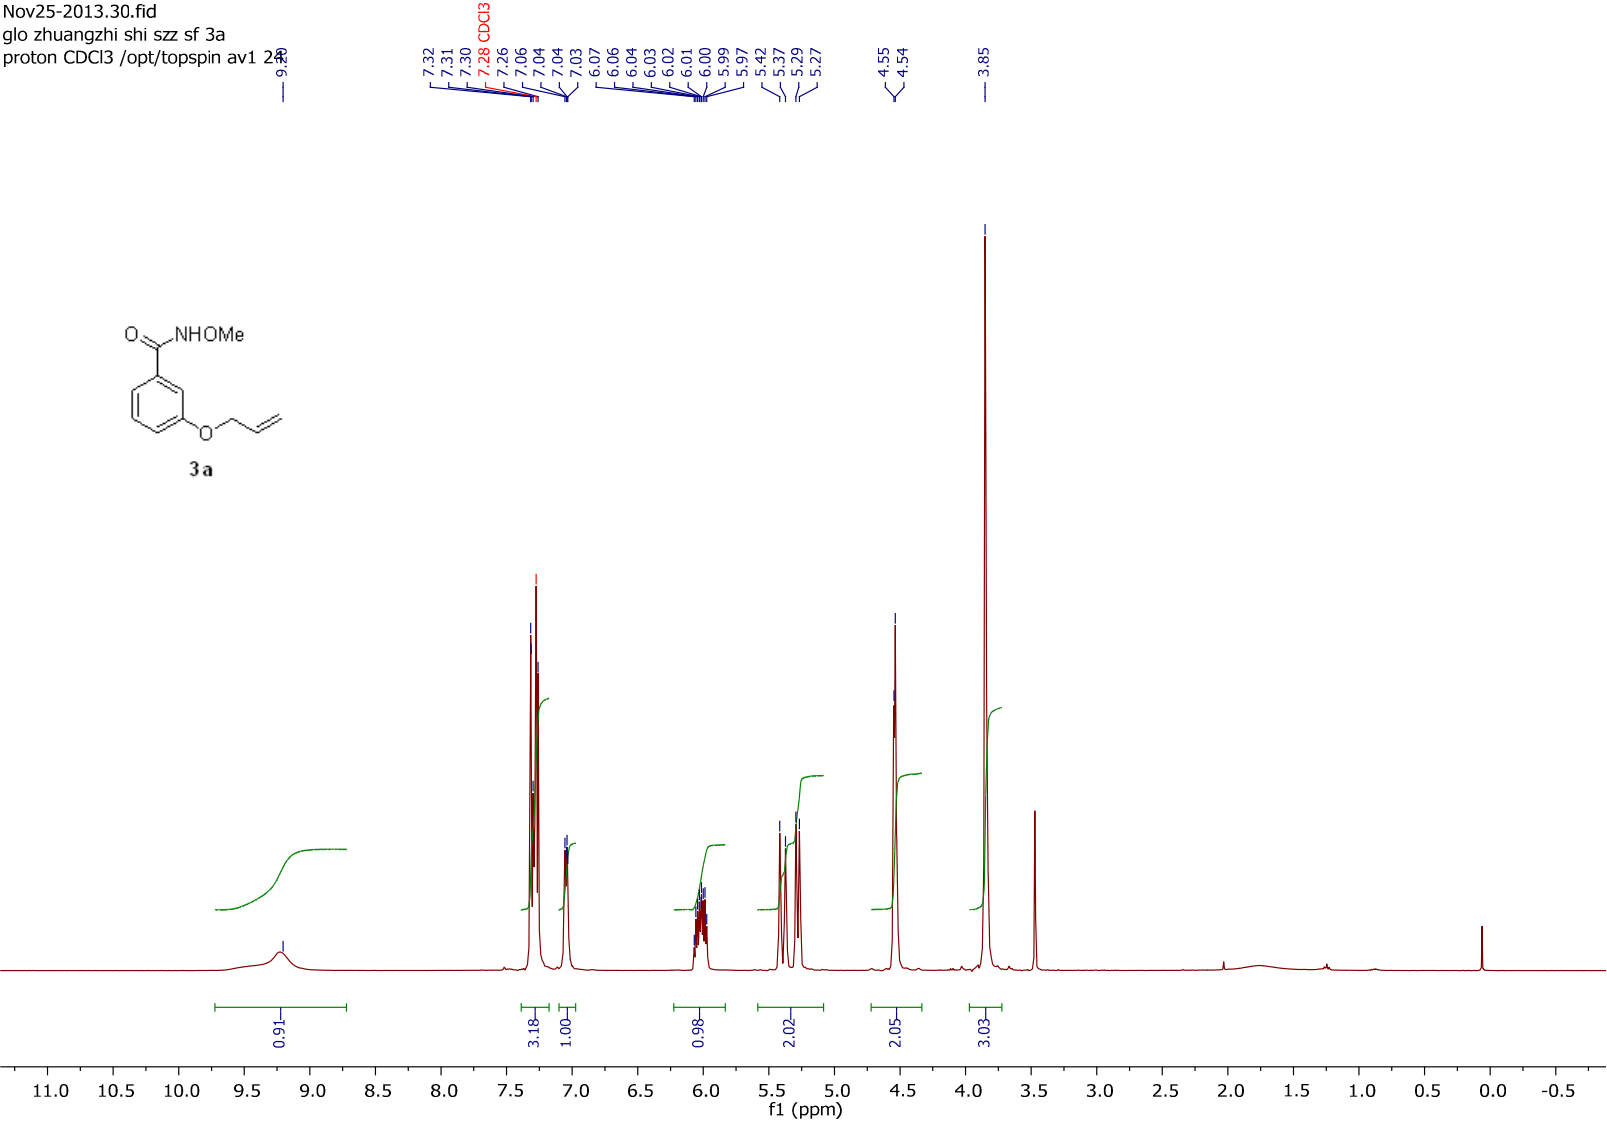

Nov25-2013.31.fid  
glo zhuangzhi shi szz sf 3a  
carbon CDCl3 /opt/topspin av1 24

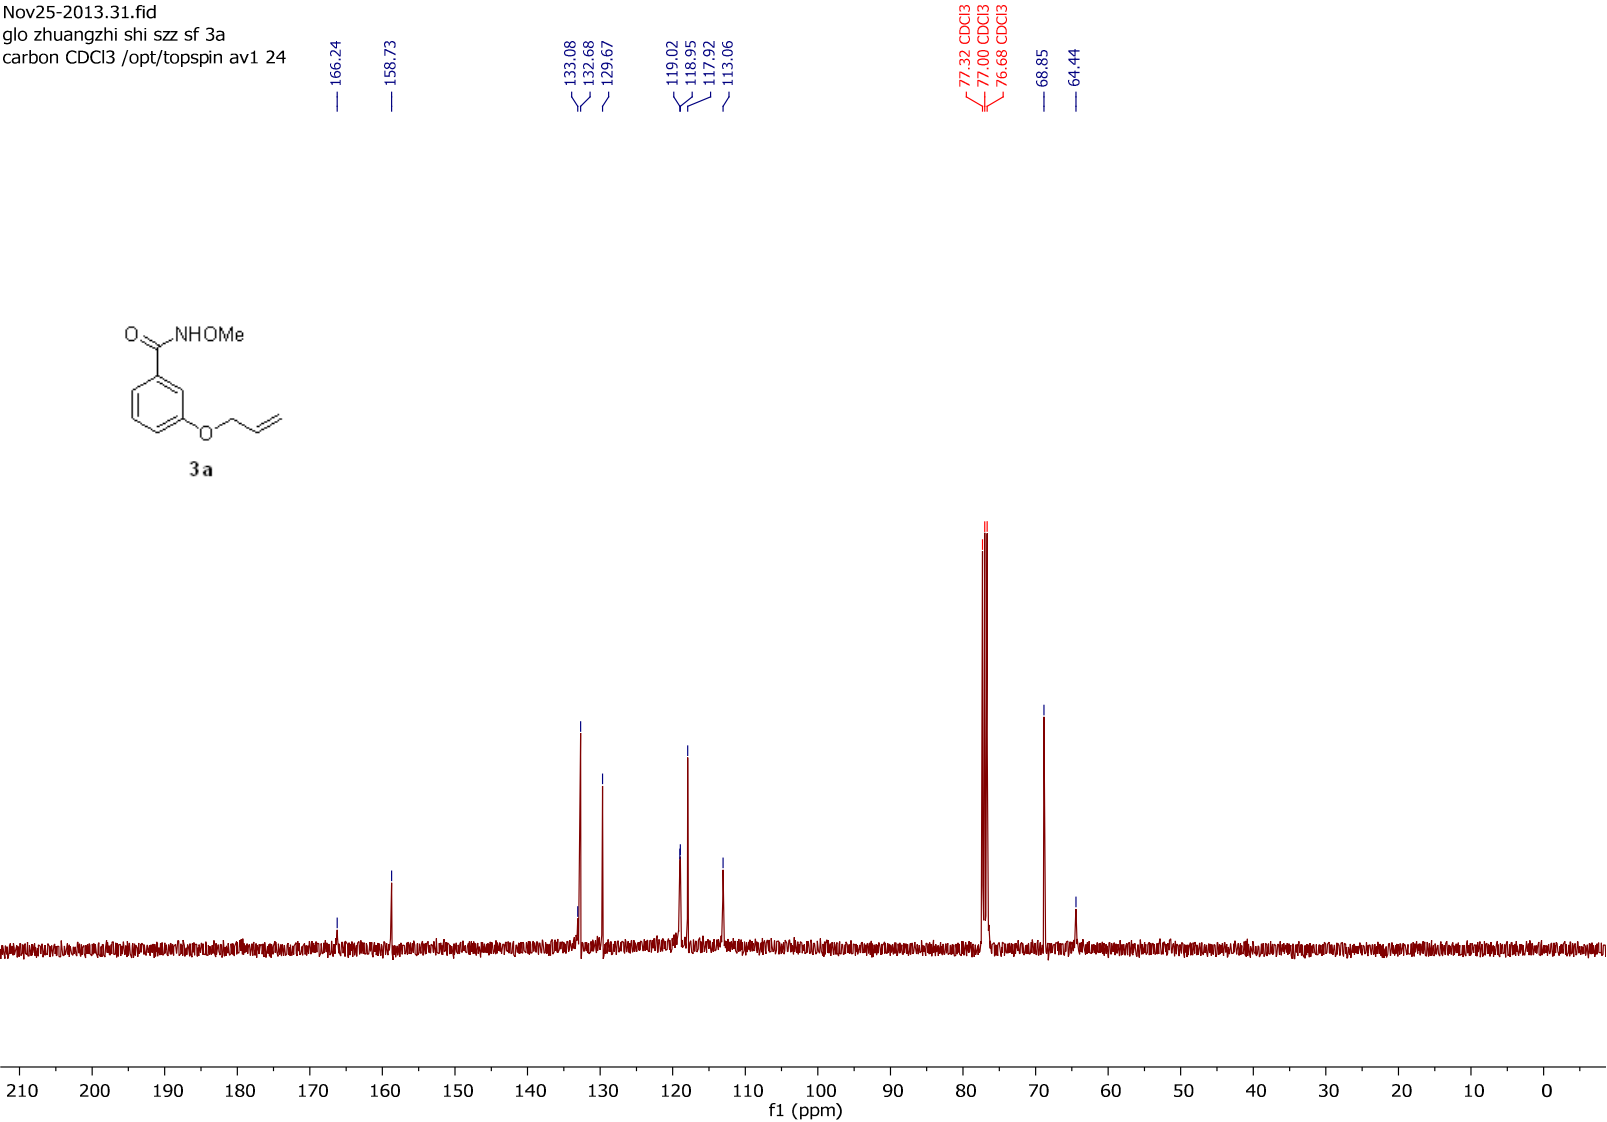

Nov13-2013.110.fid  
glo shi szz sf 128  
proton CDCl3 /opt/topspin av1 55

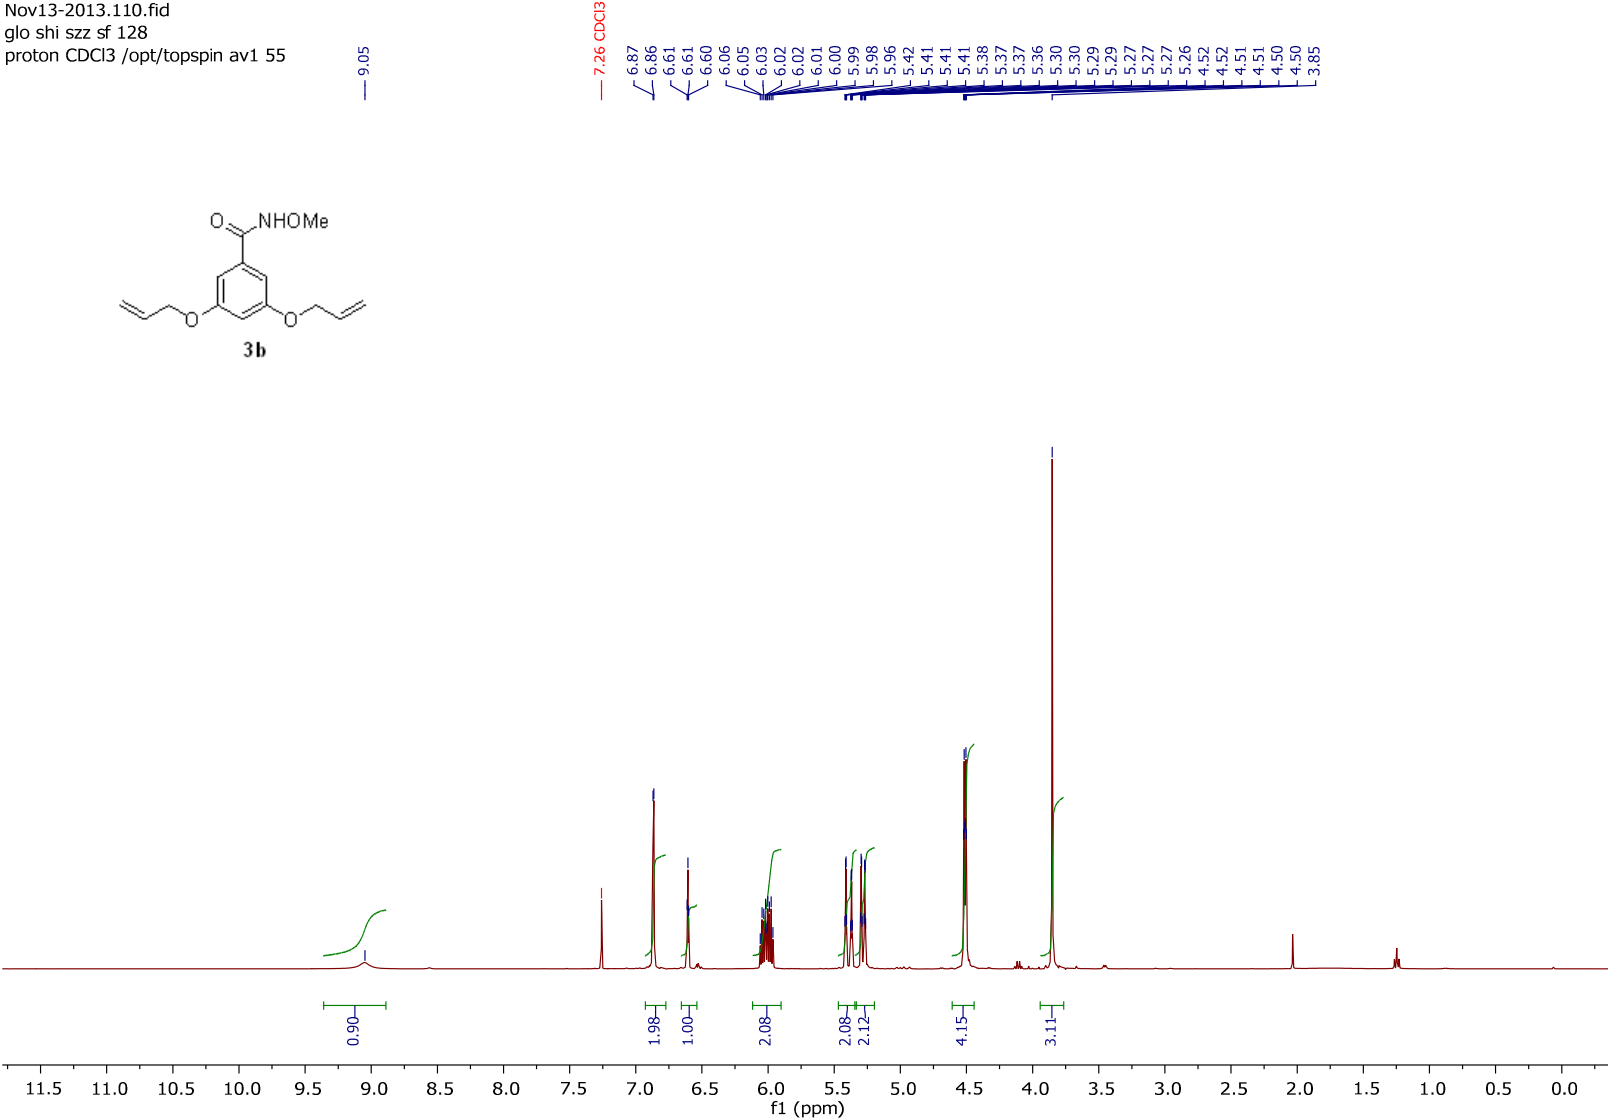

Nov13-2013.111.fid  
glo shi szz sf 128  
carbon\_256 CDCl3 /opt/topspin av1 55

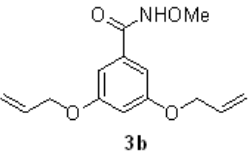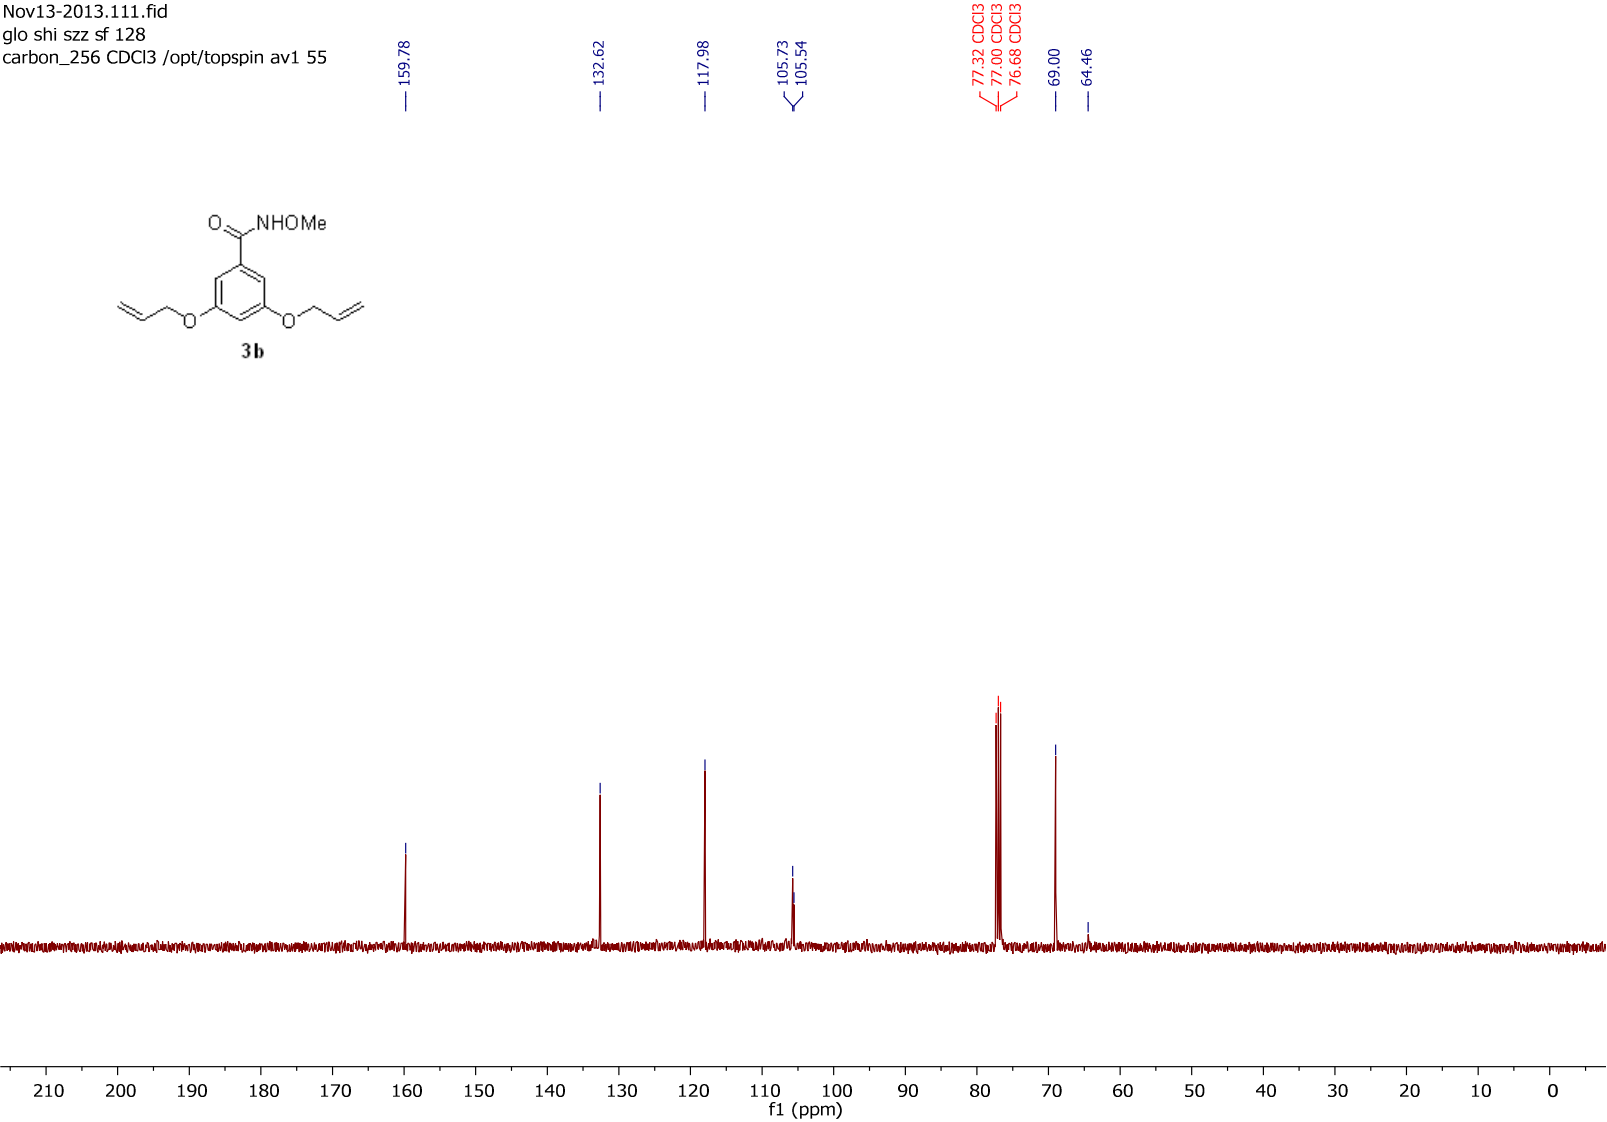

Oct29-2013.50.fid  
glo zhuangzhi shi szz sf 099  
proton CDCl3 /opt/topspin av1 2

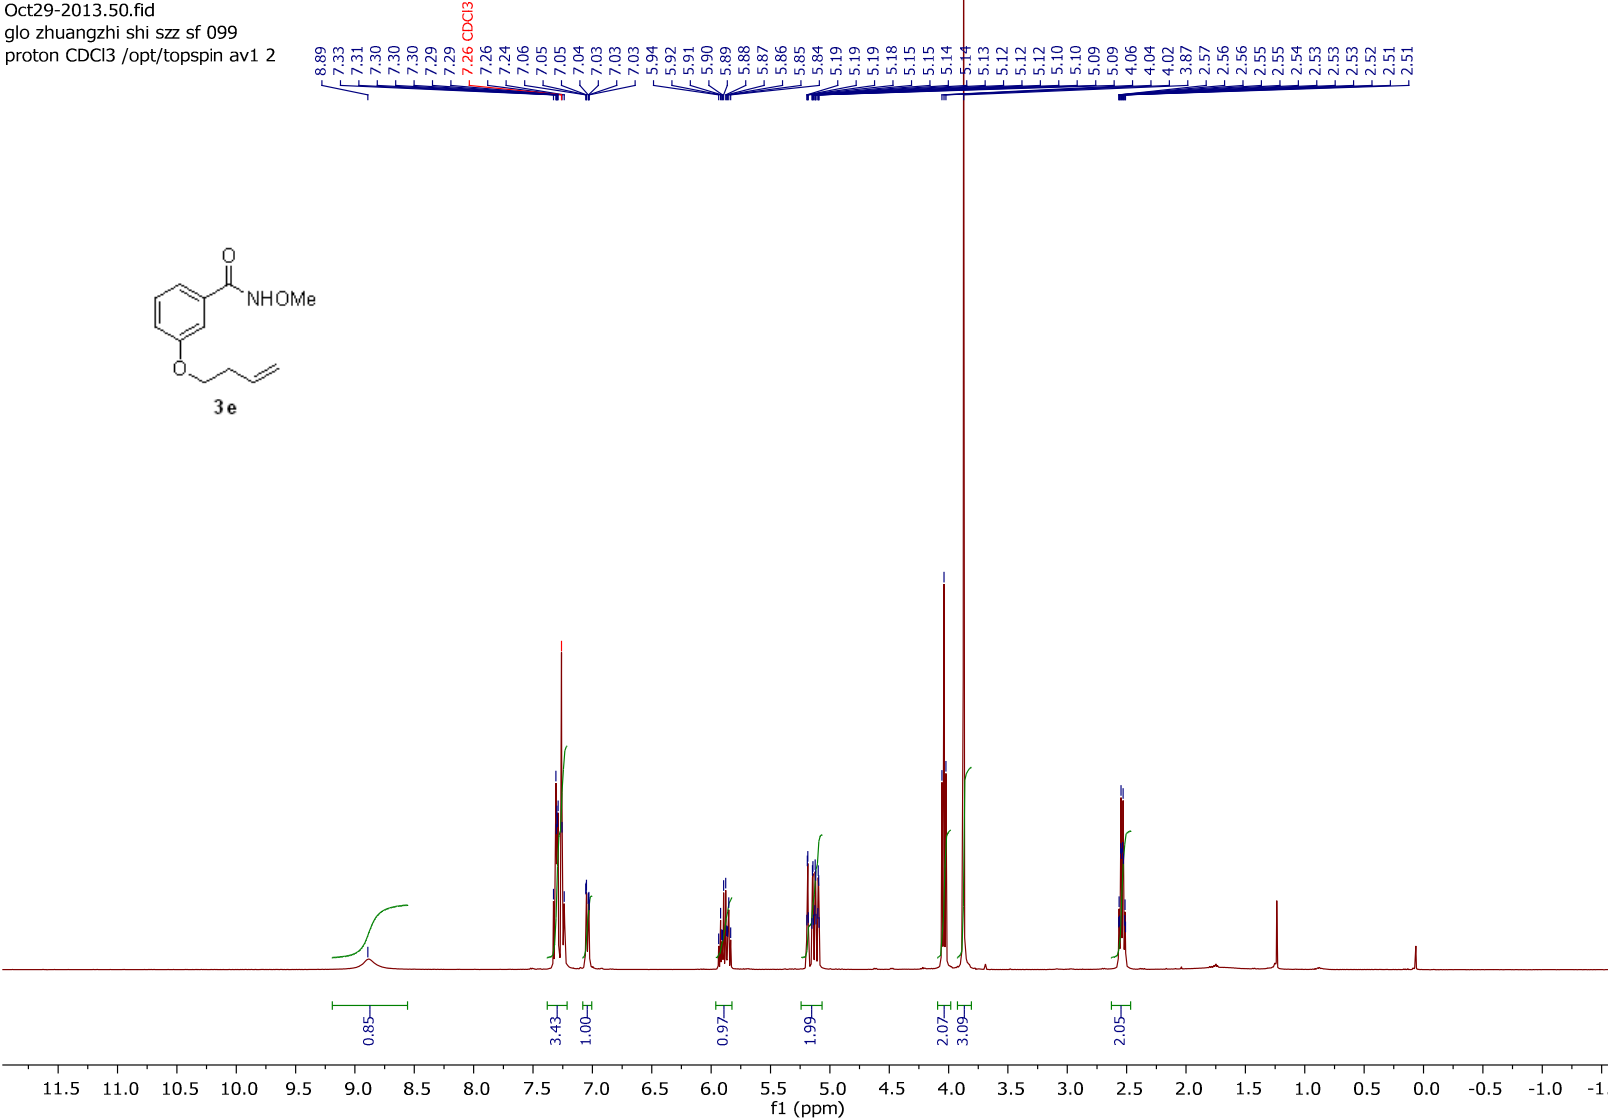



Oct29-2013.51.fid  
glo zhuangzhi shi szz sf 099  
carbon CDCl3 /opt/topspin av1 2

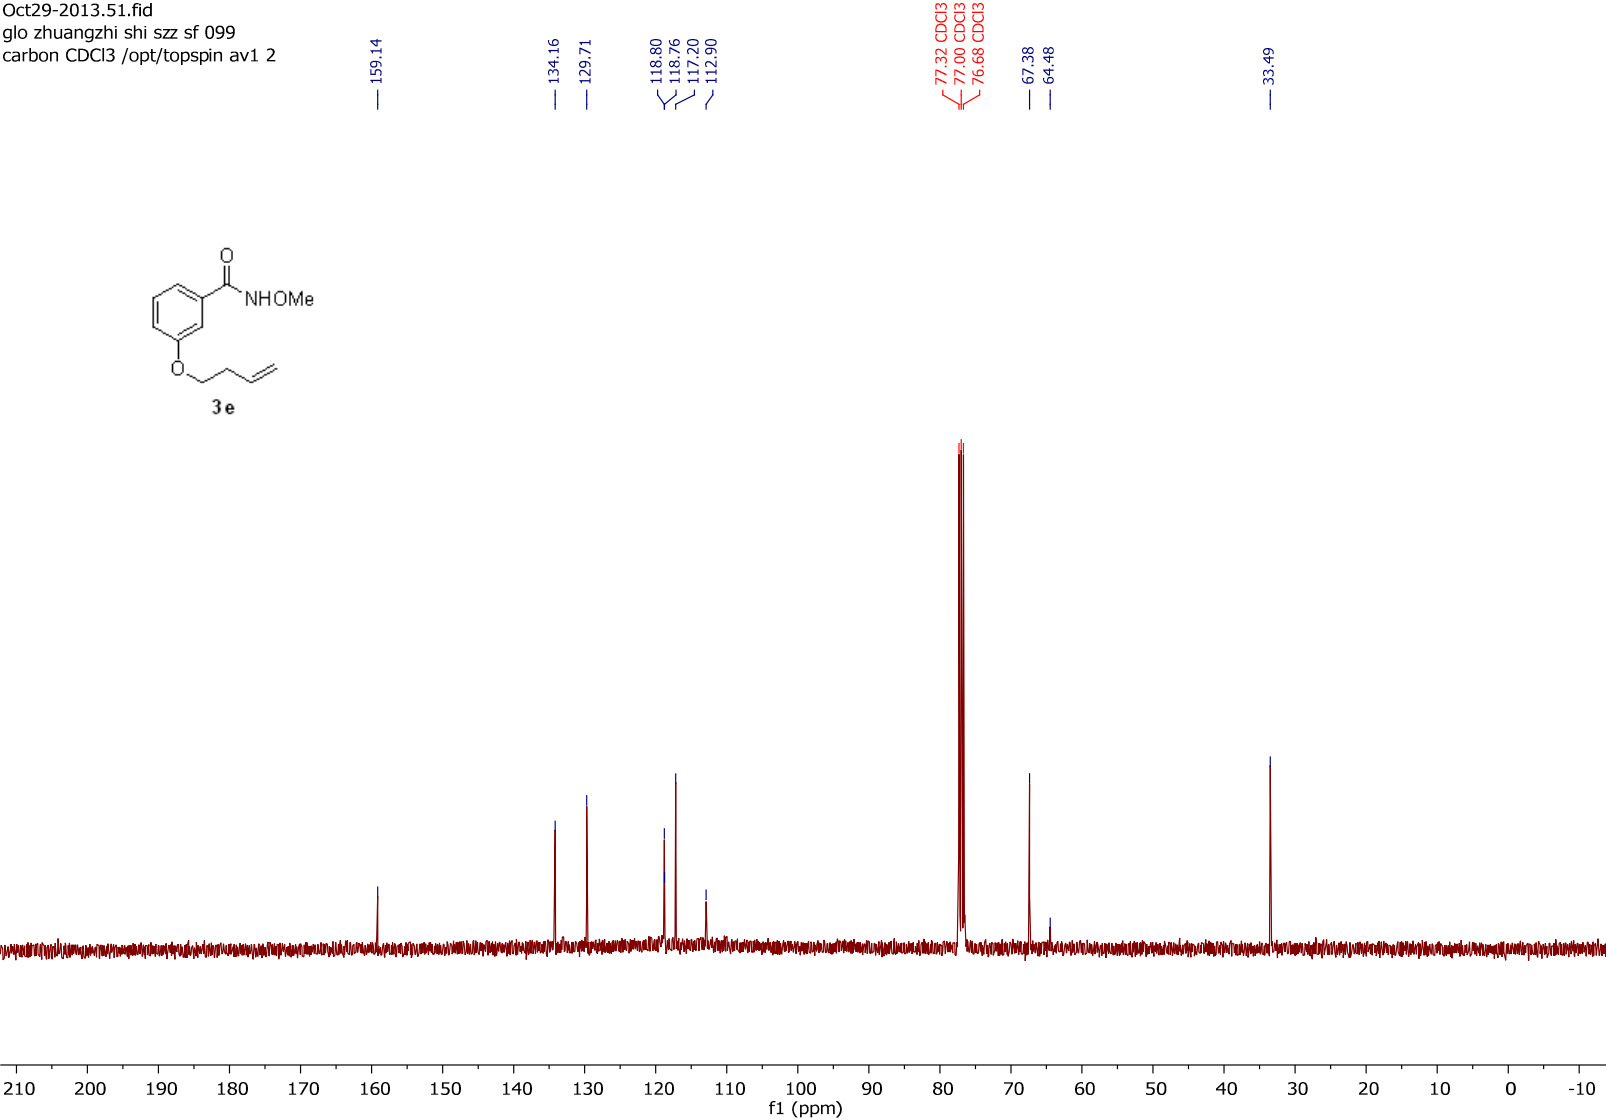

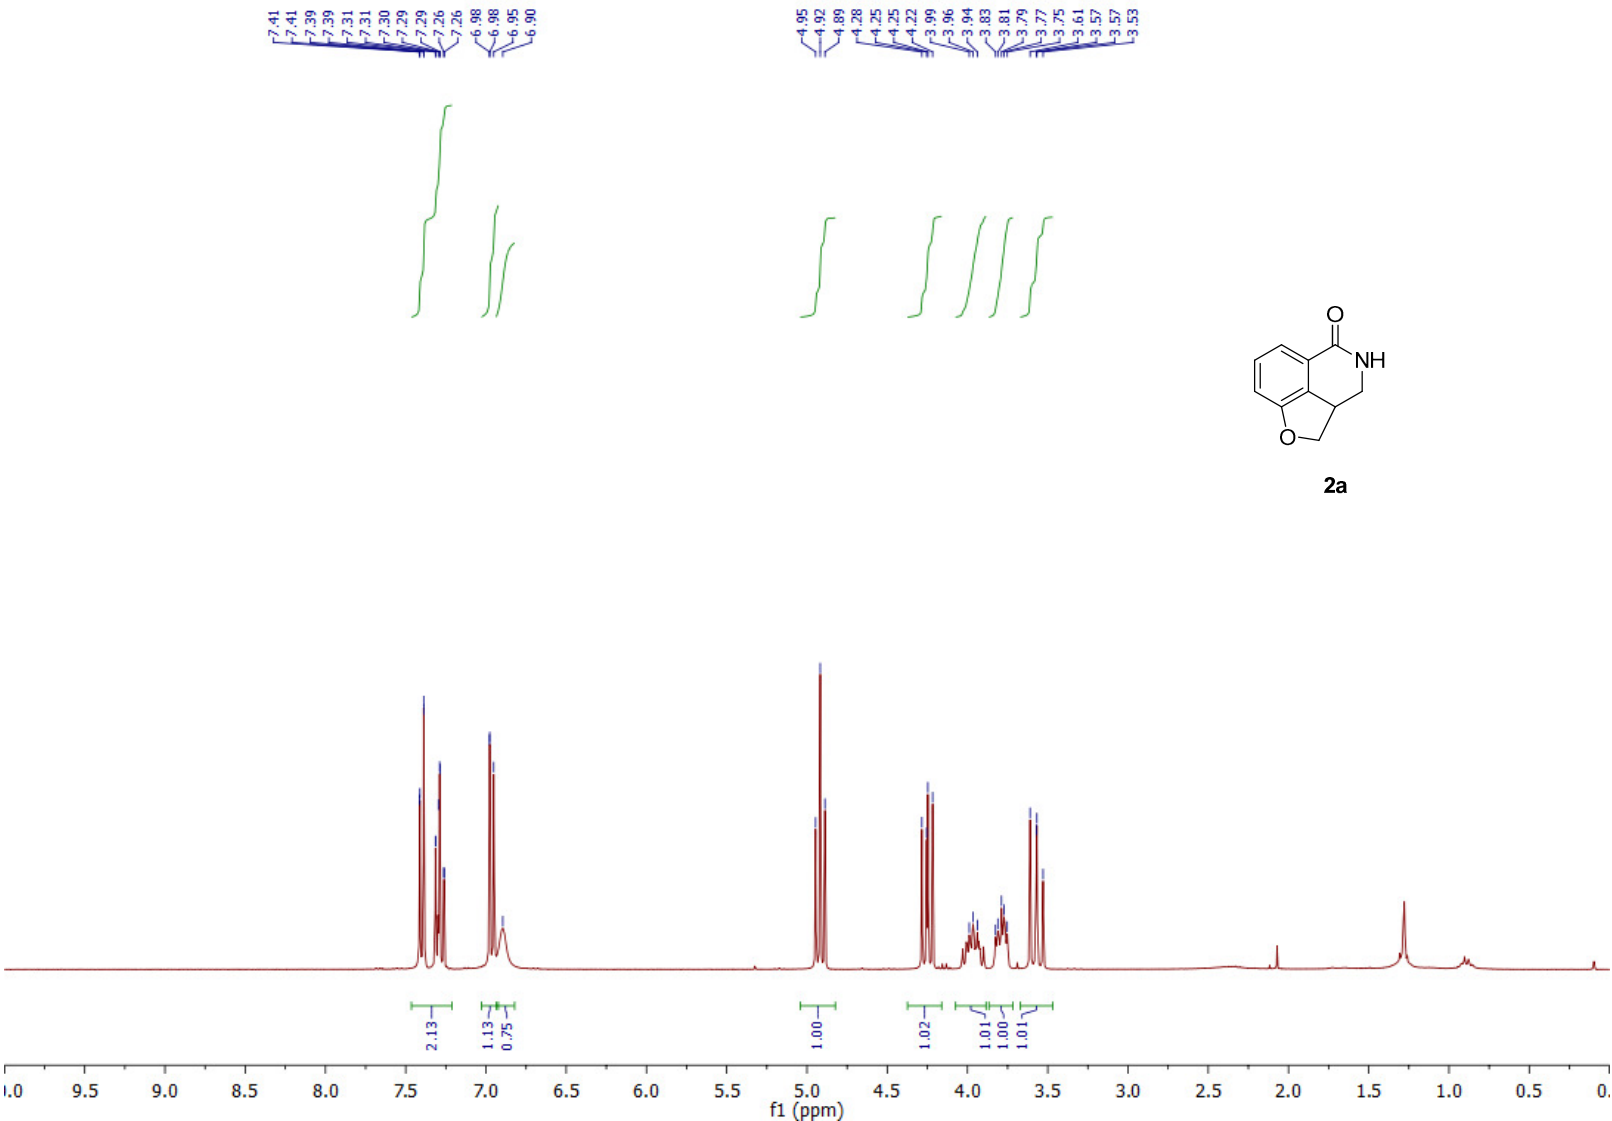

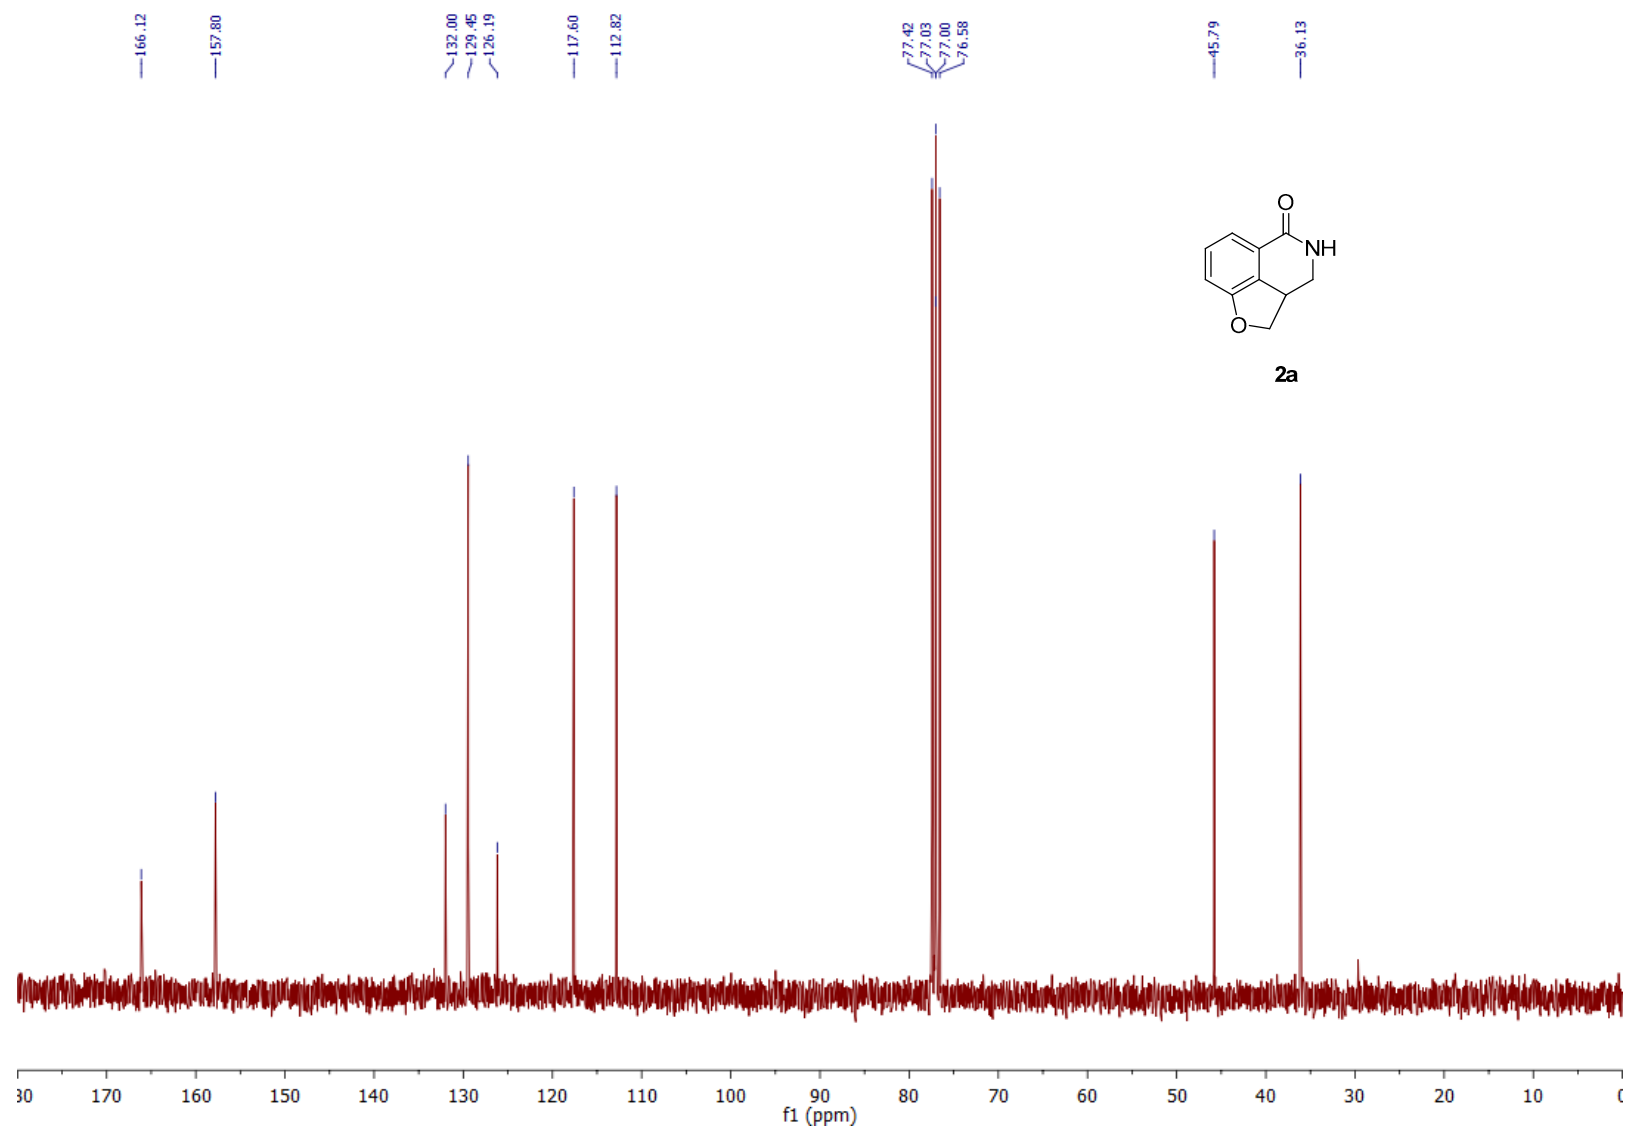

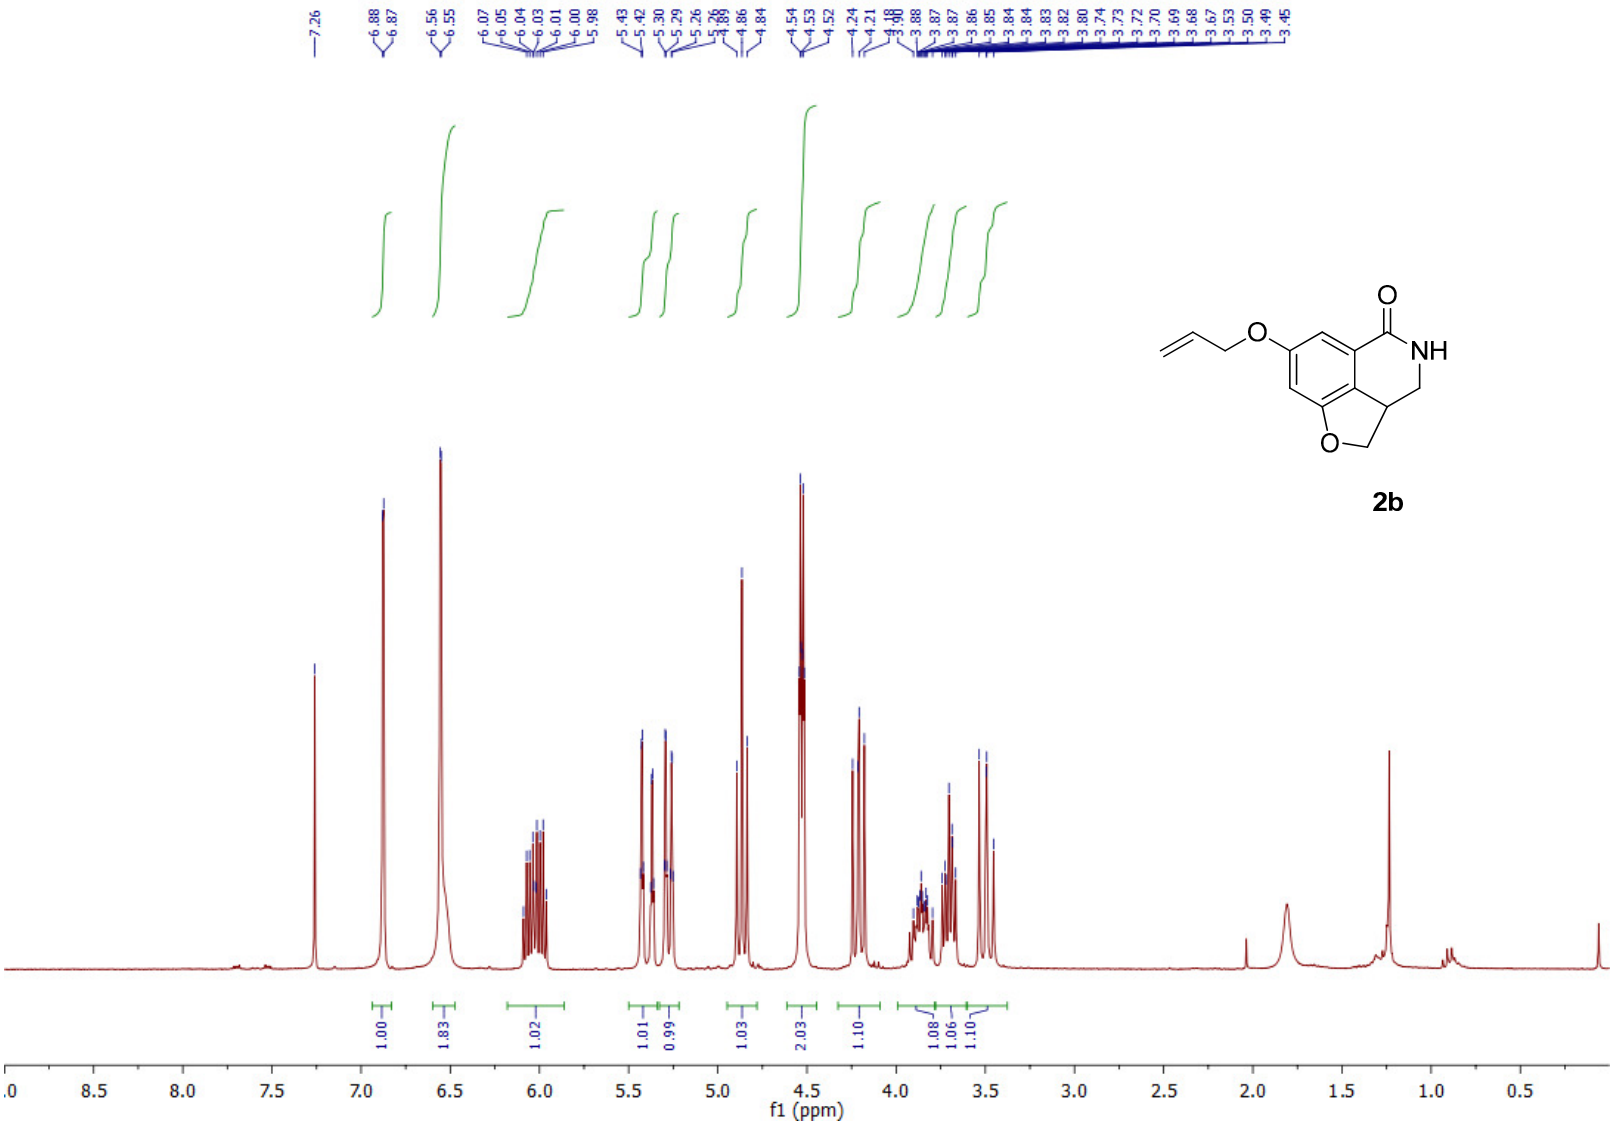

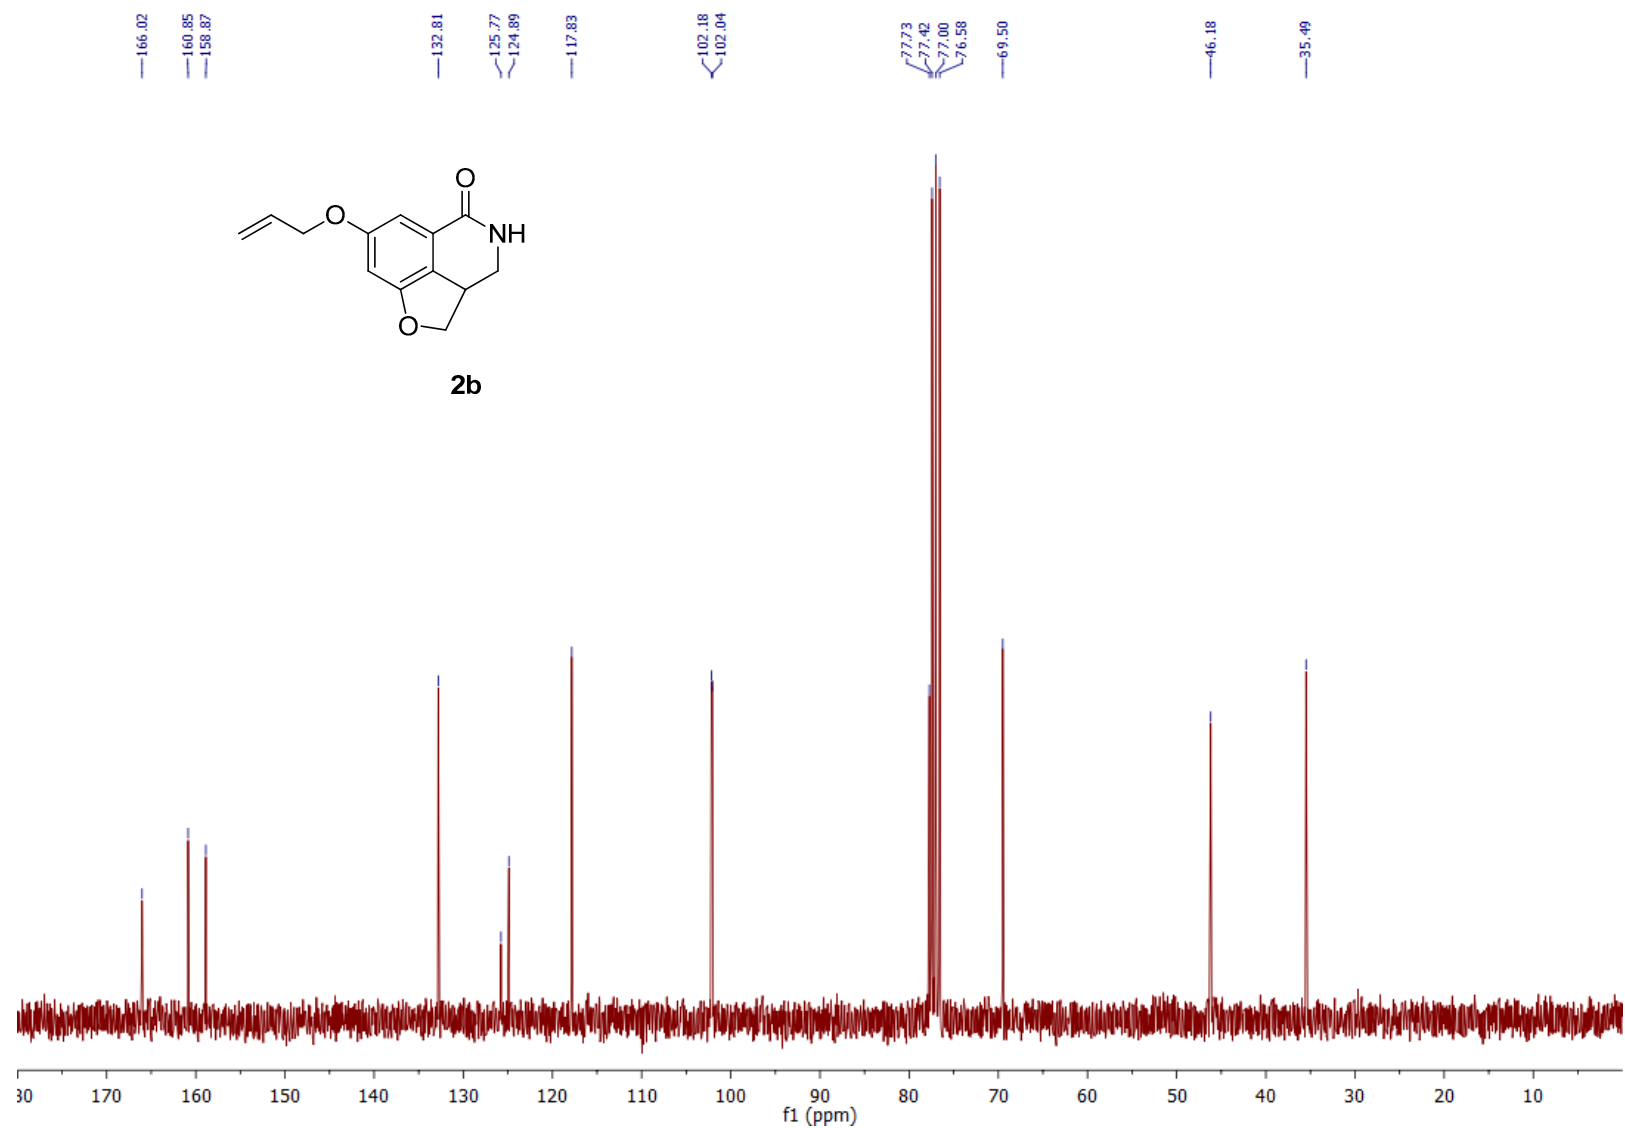

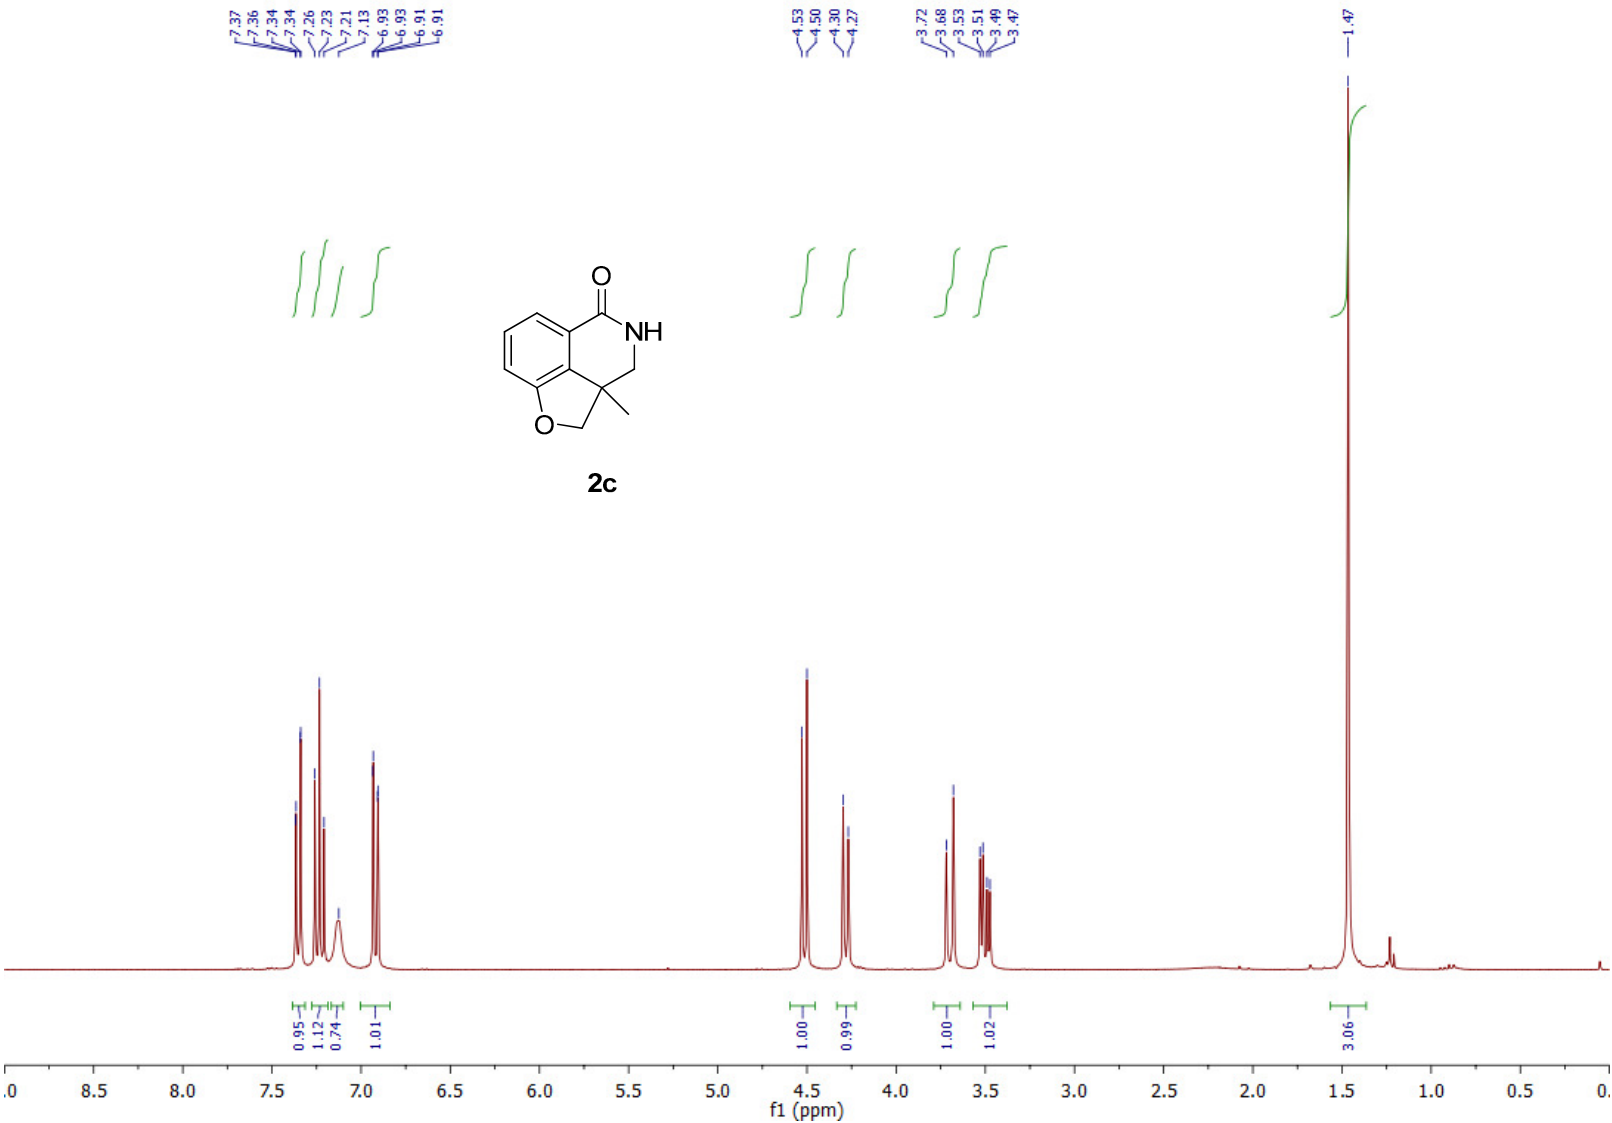

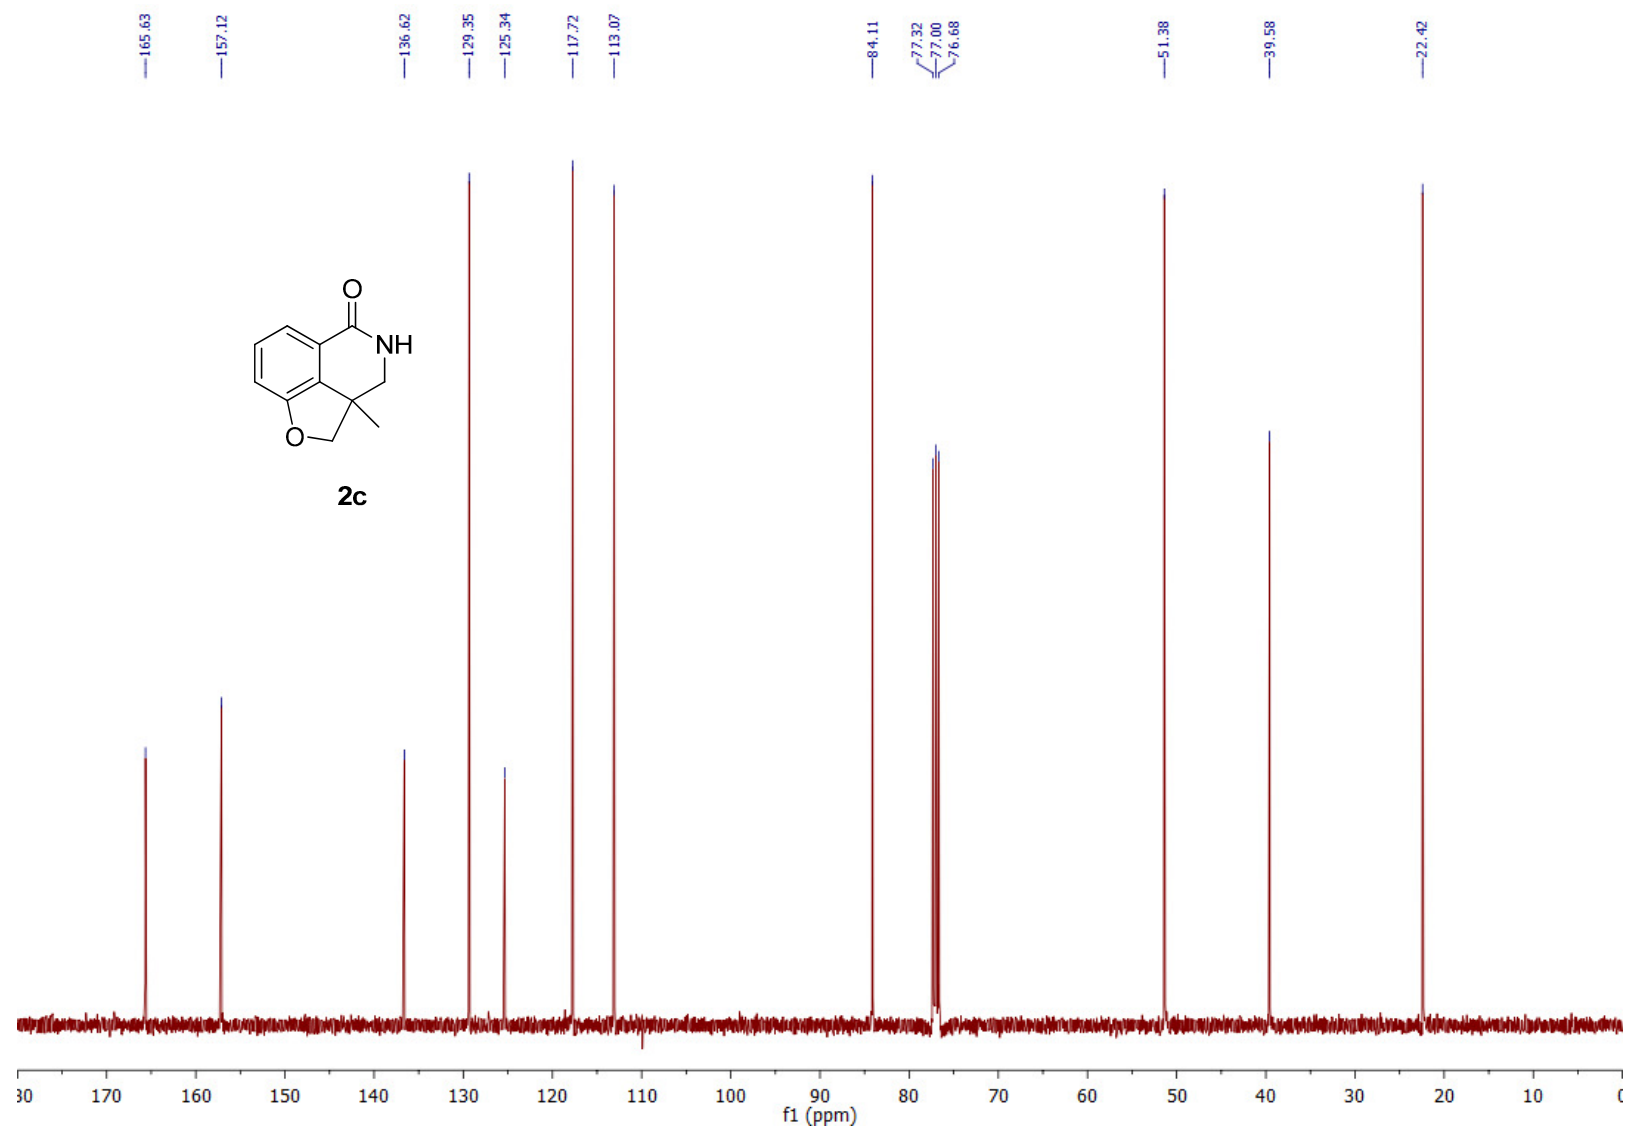

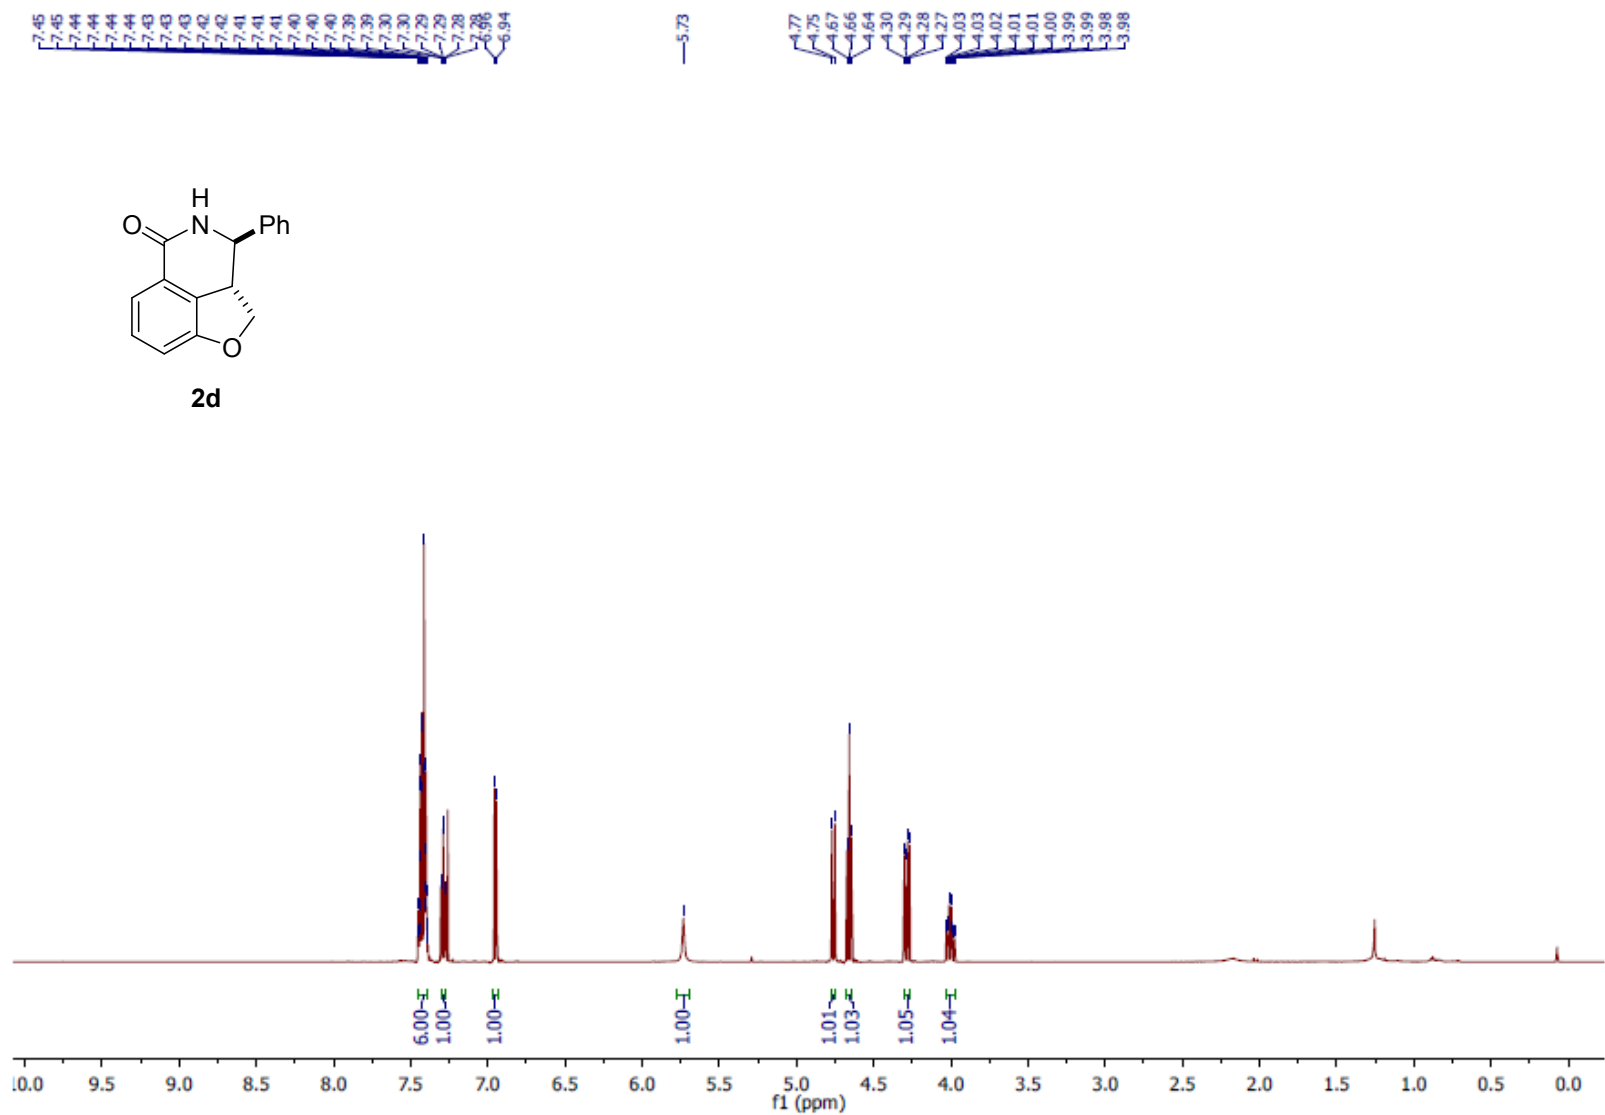



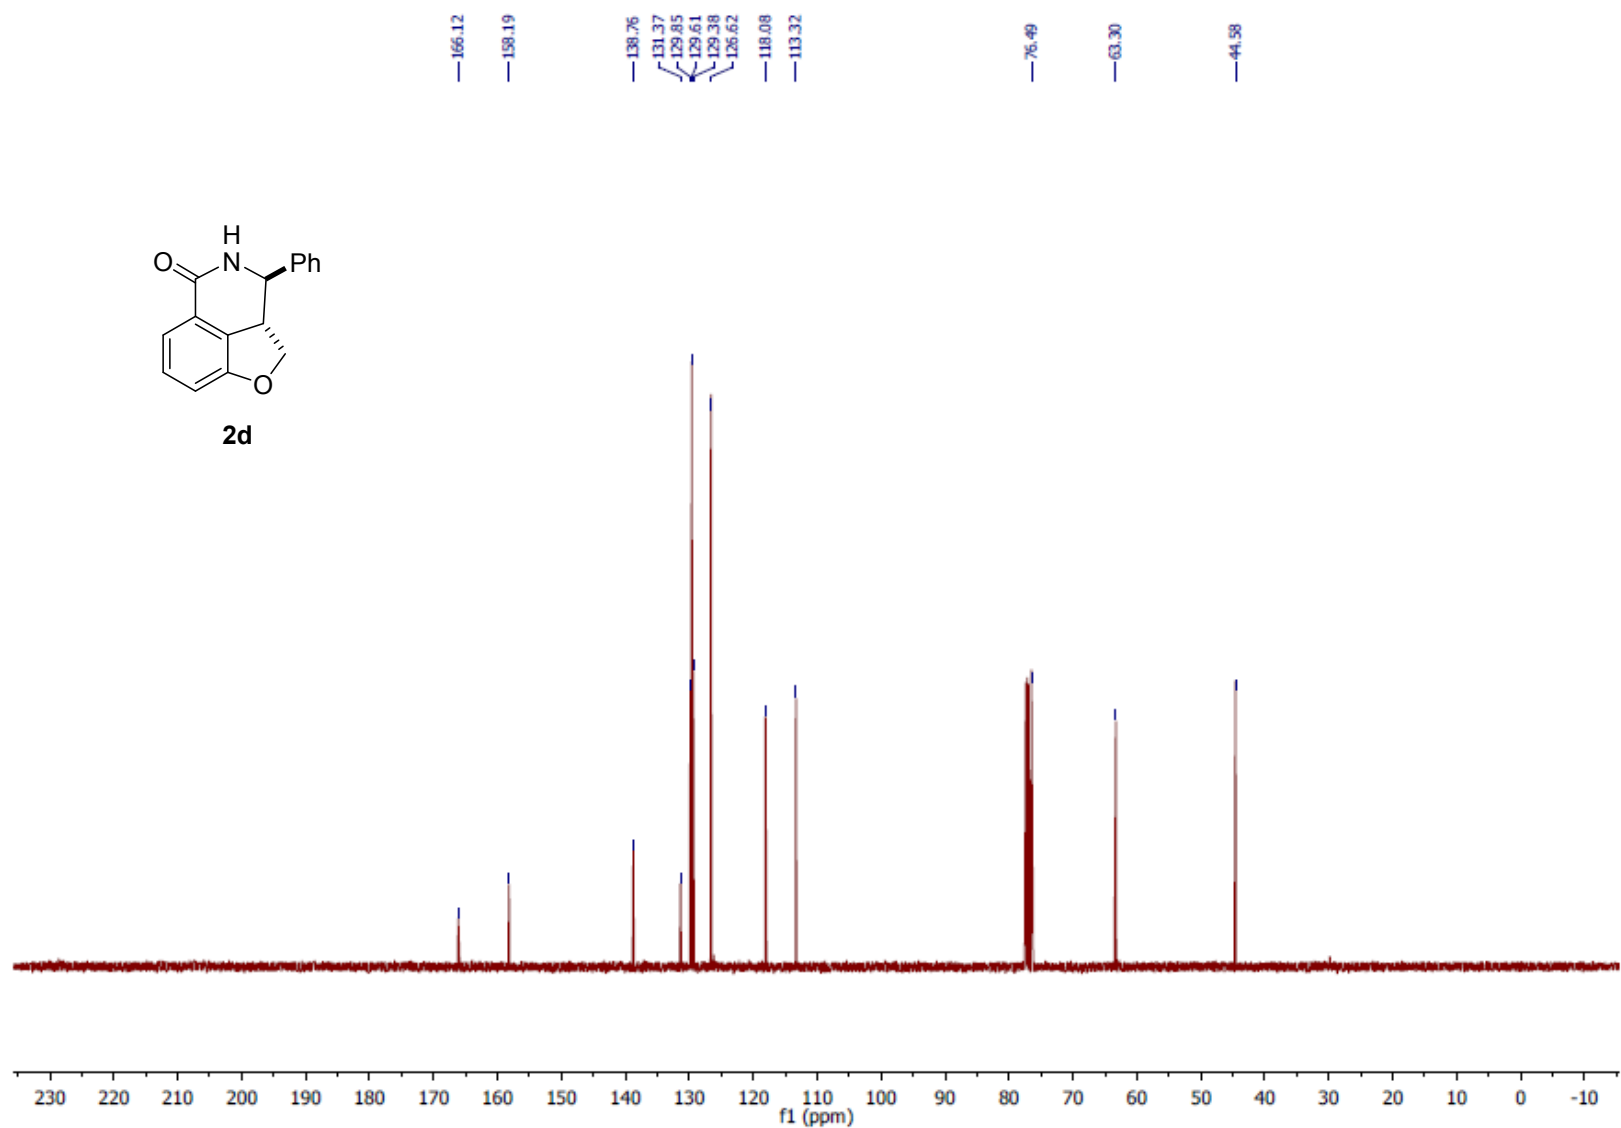

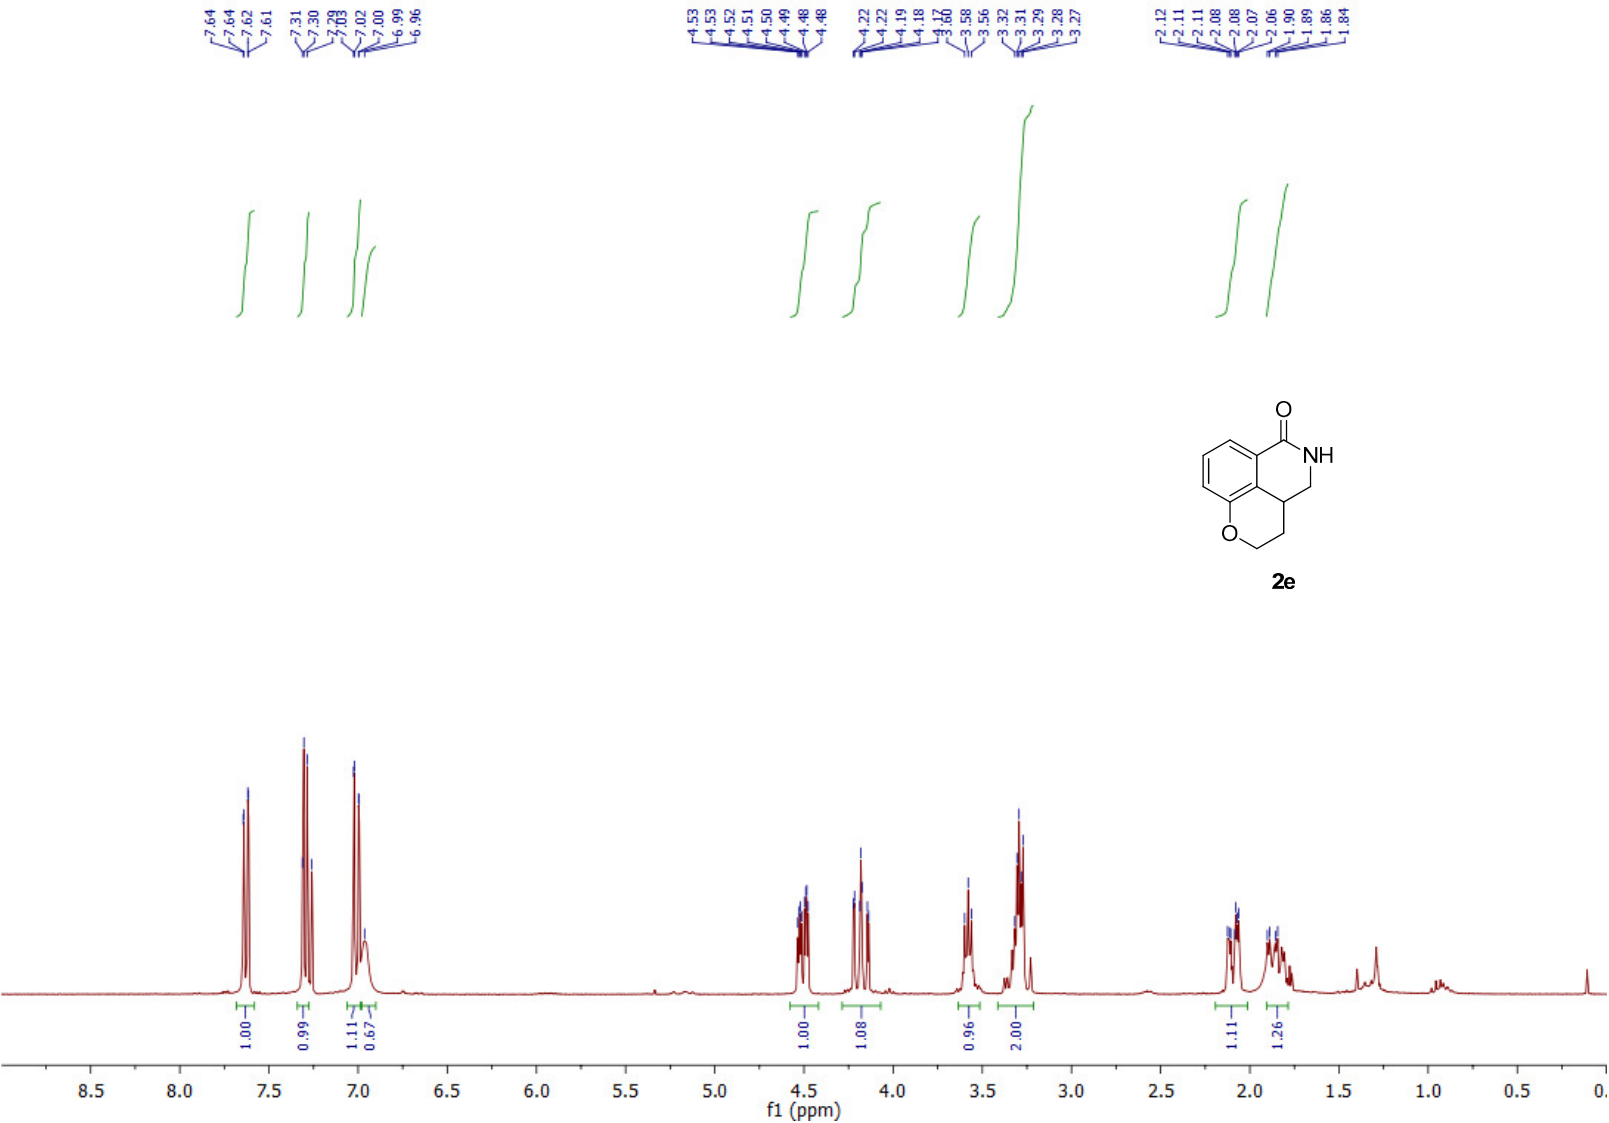

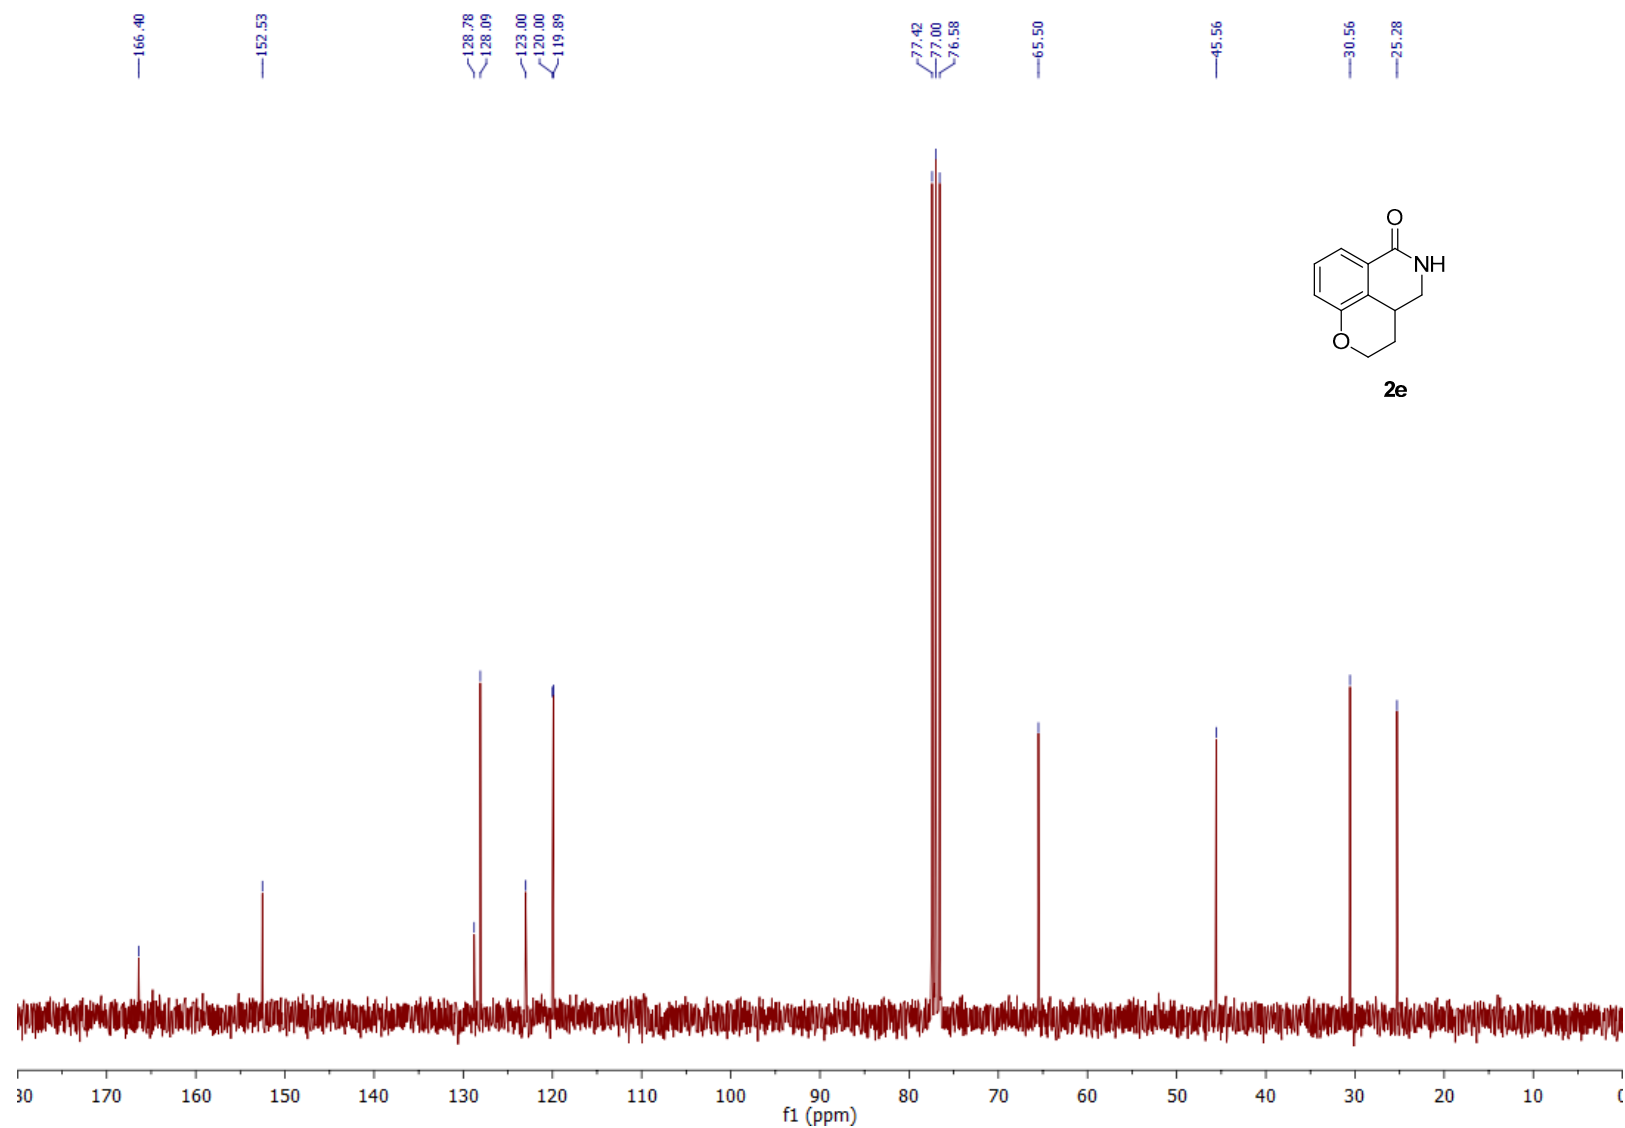

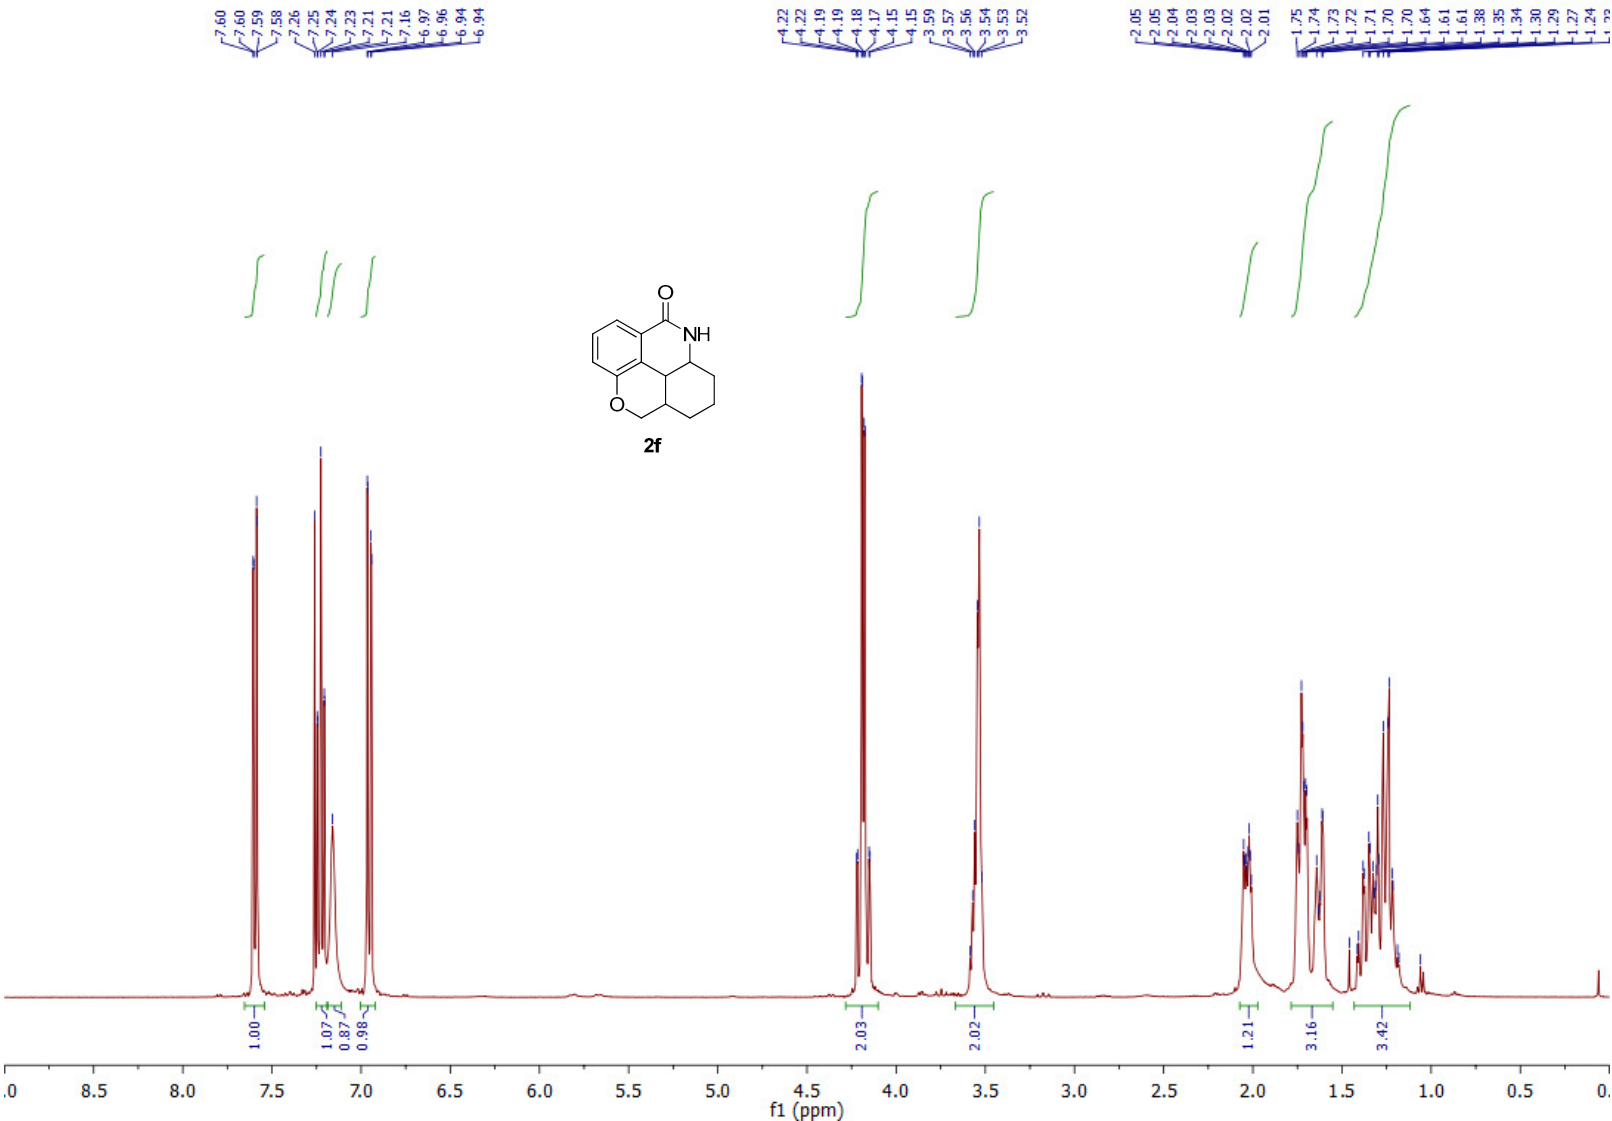

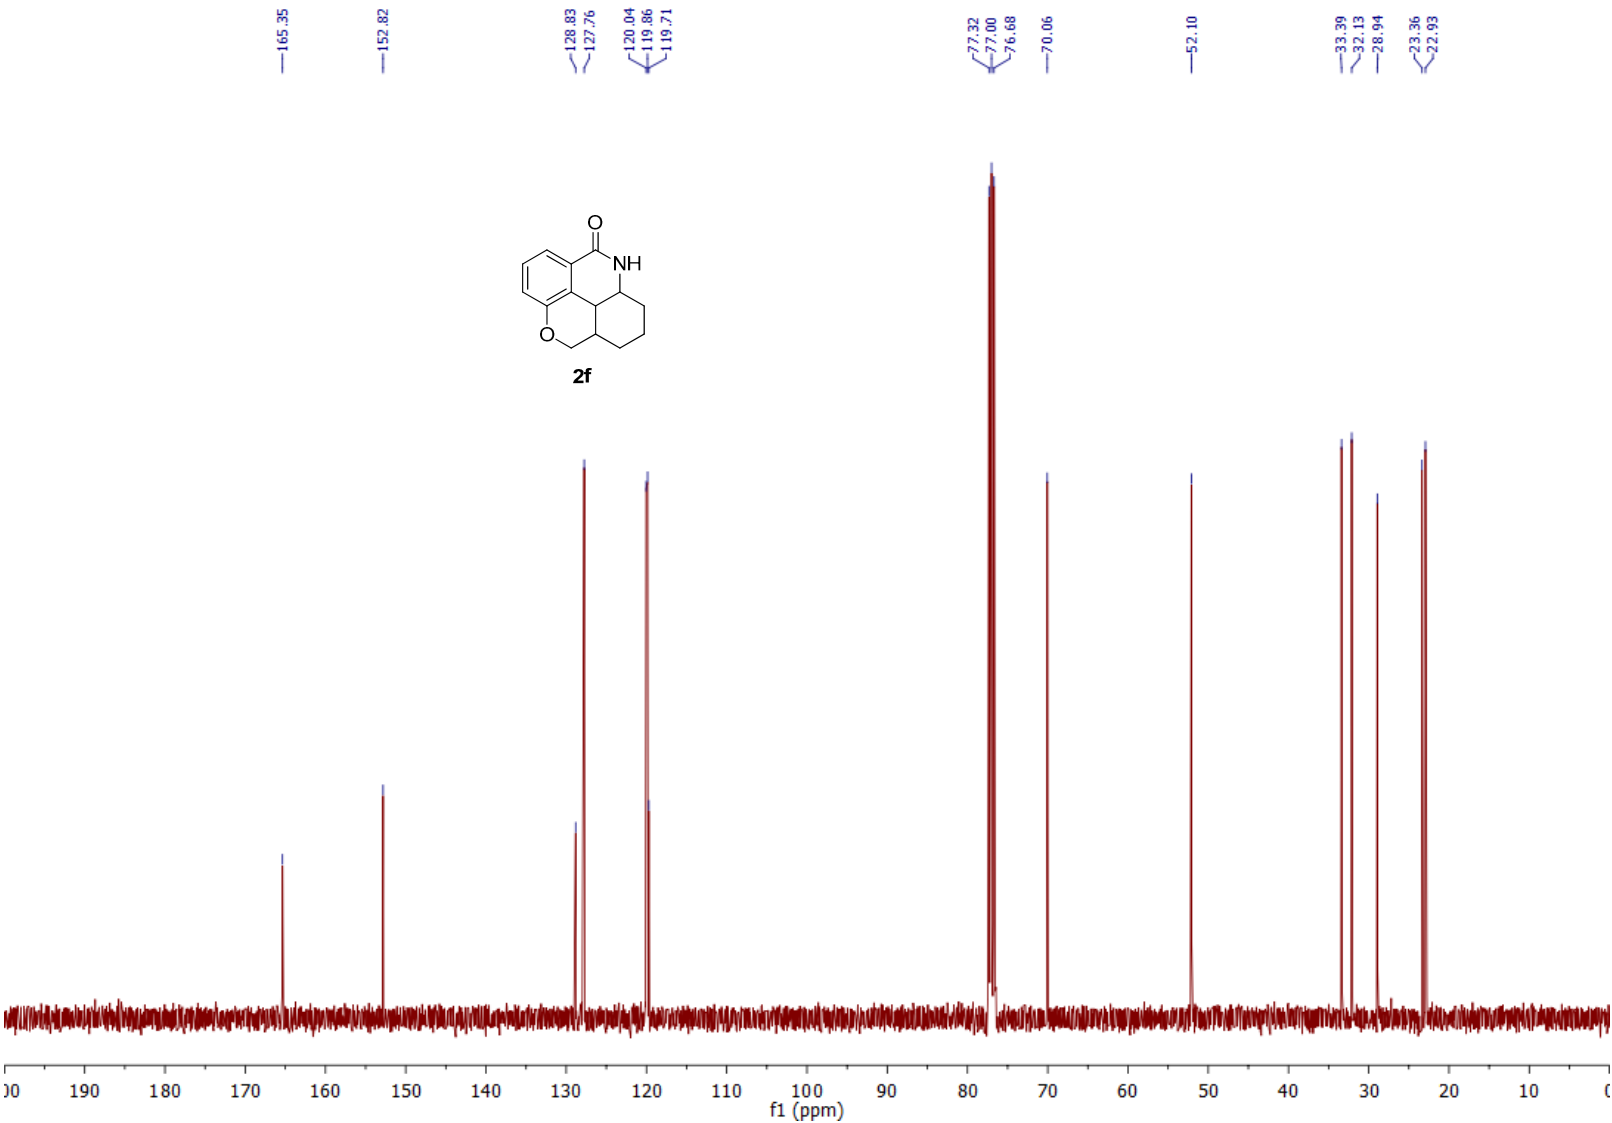

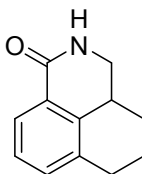

**2g**

Nov28-2013.61.fid  
glo melissa mba mb 088 f1  
carbon\_5120 CDCl3 /opt/topspin av1 35

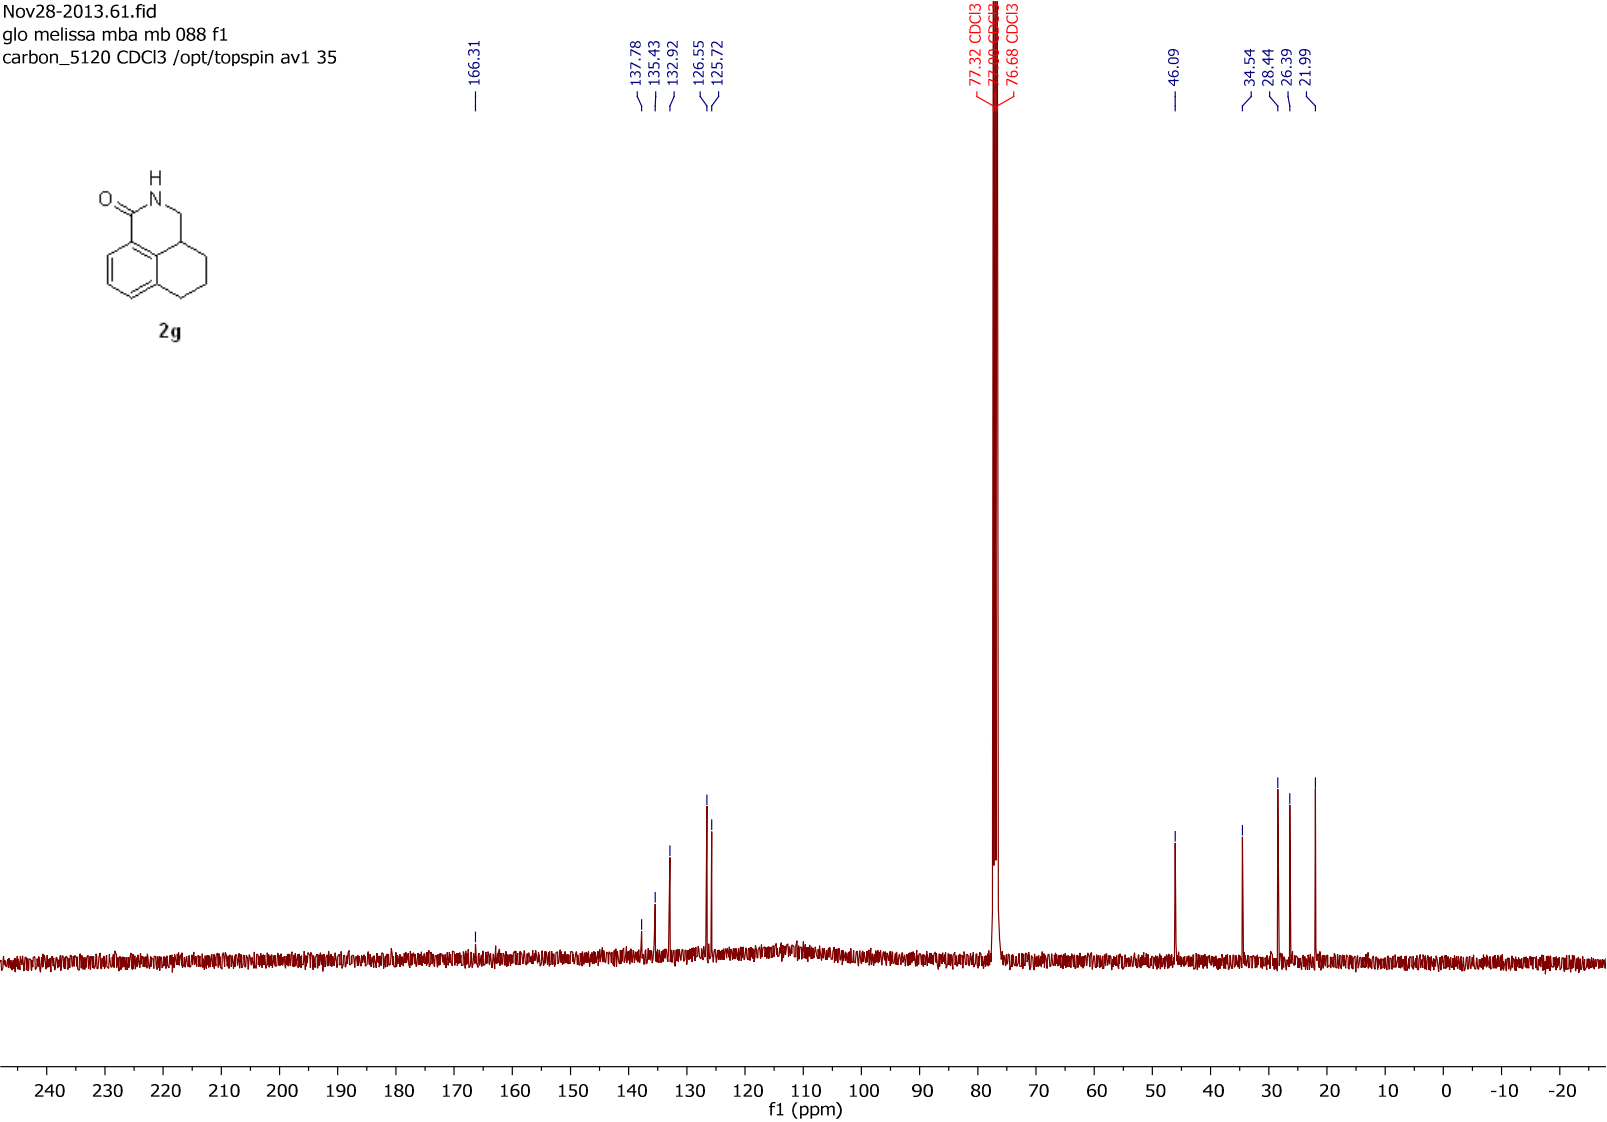

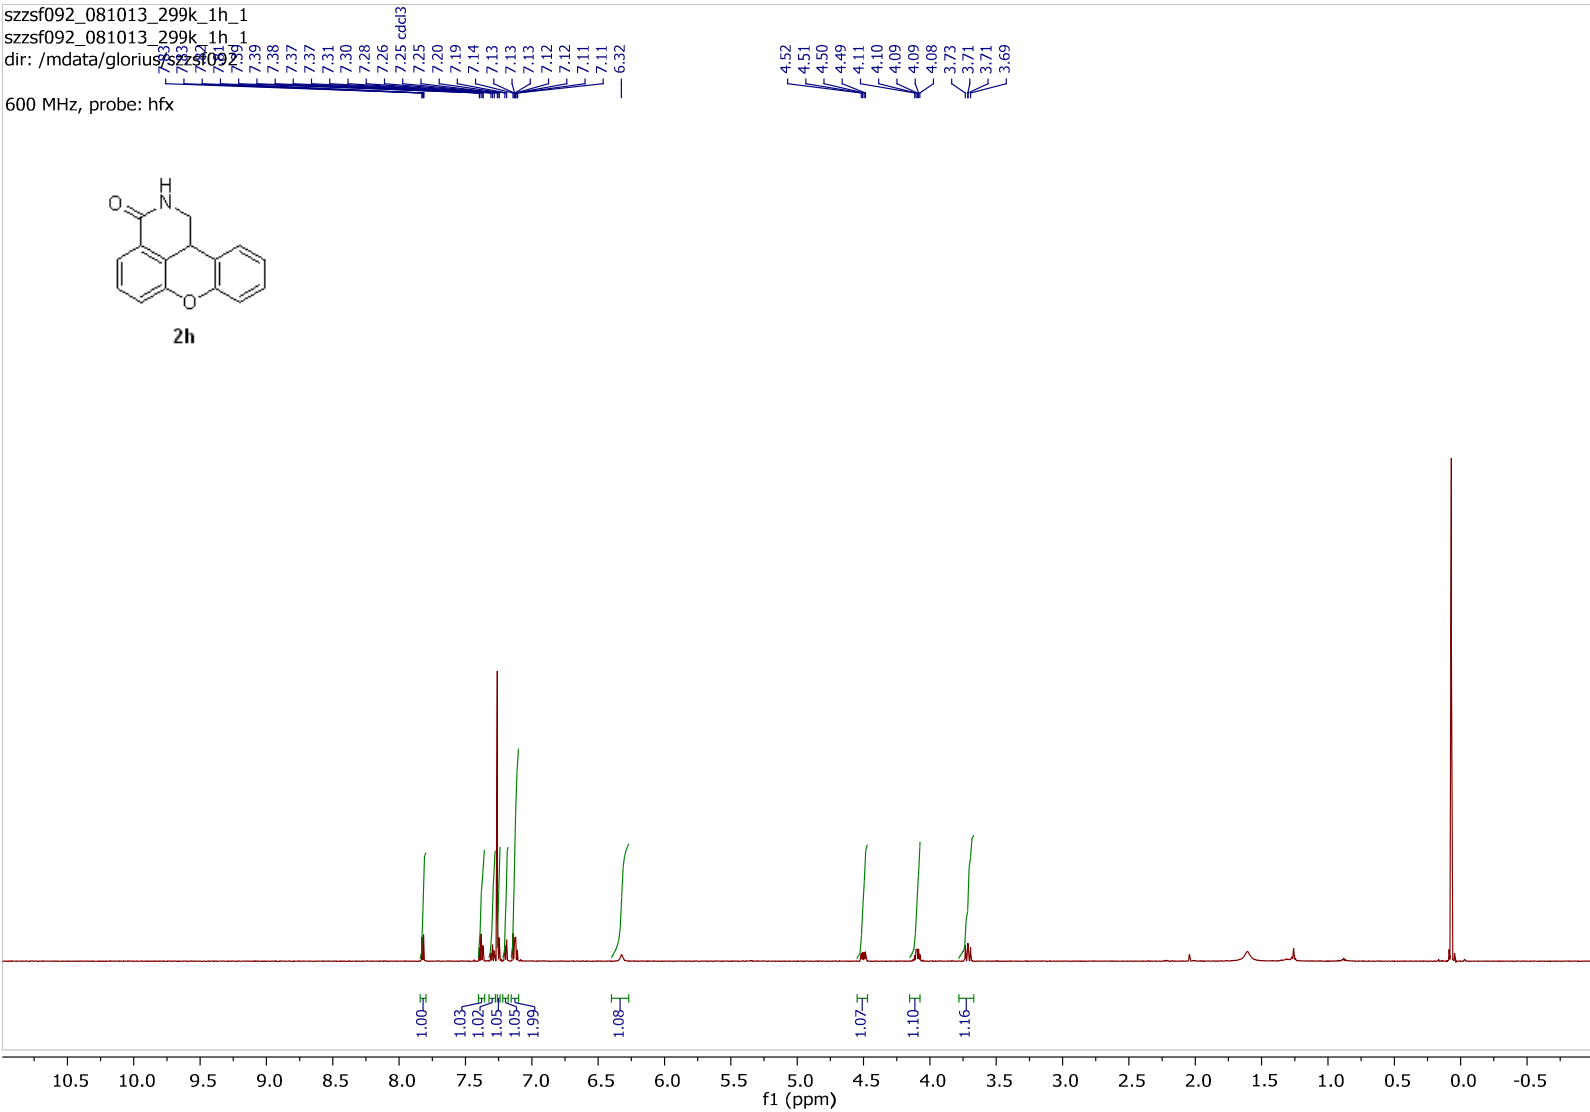



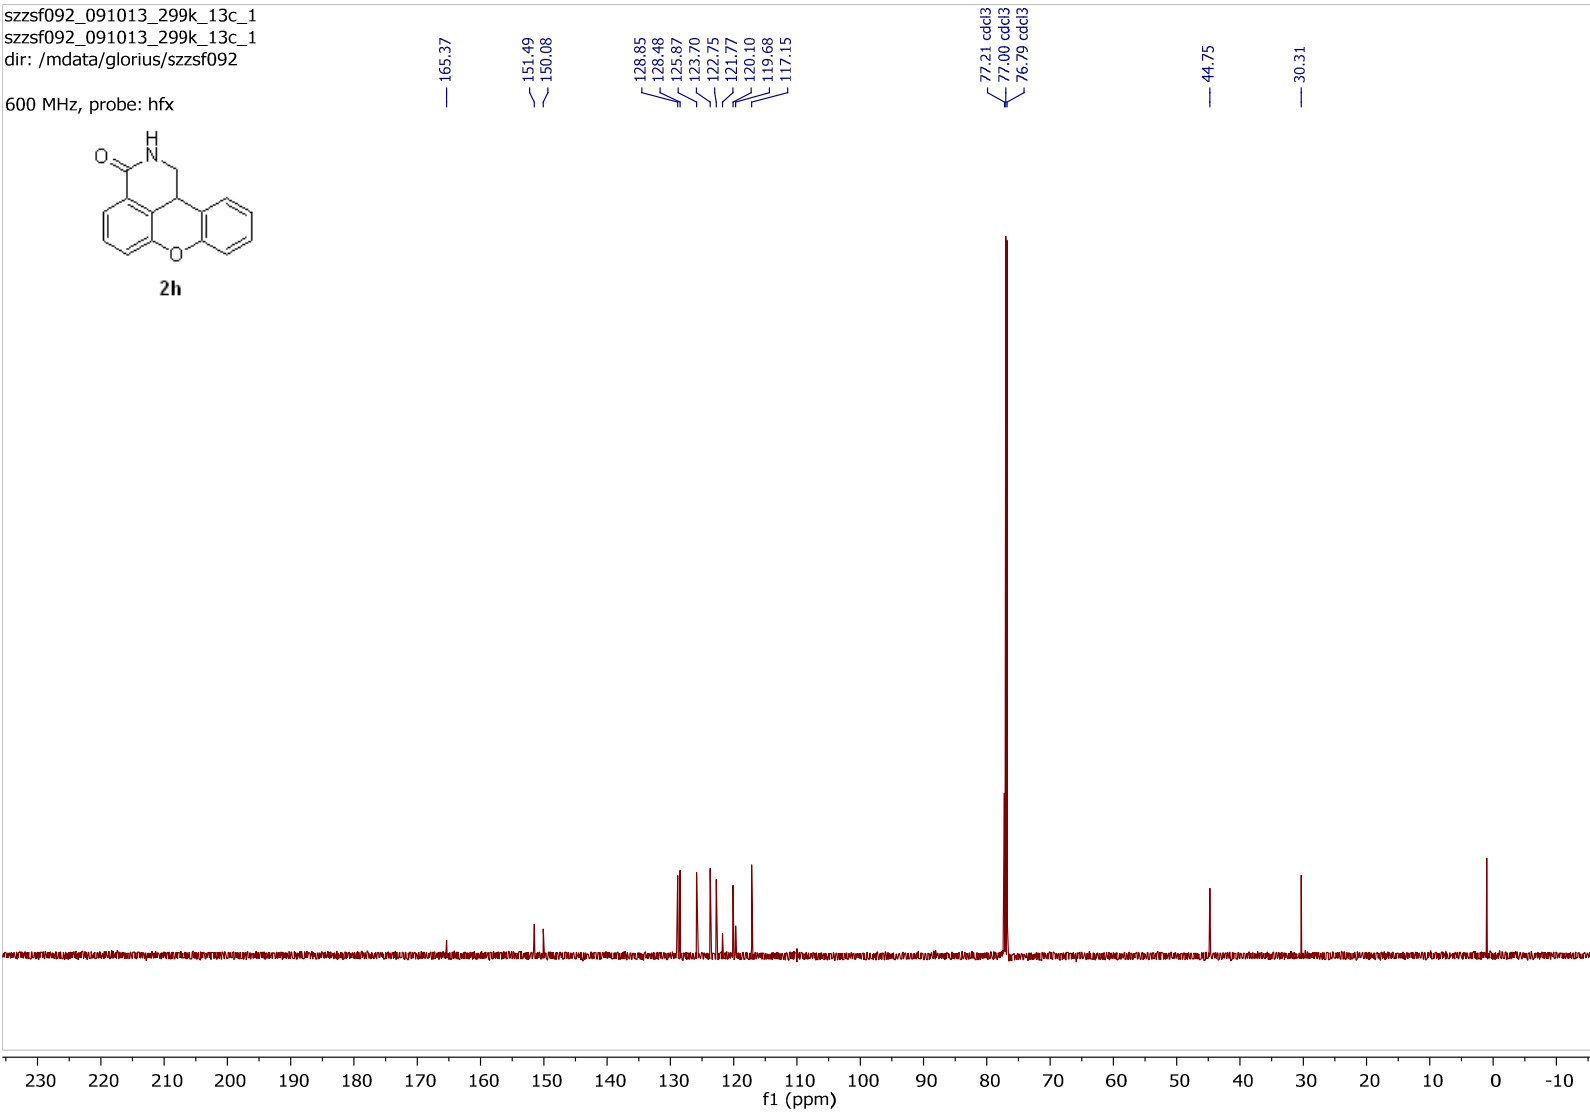

Aug14-2013.340.fid  
glo shi szz sf 073  
proton CDCl3 /opt/topspin av4

7.47  
7.26  
7.13  
7.12

6.57  
6.47  
6.46  
6.45

5.02  
4.99  
4.96  
4.36  
4.33  
4.32  
4.29  
4.13  
4.11  
4.10  
4.09  
4.08  
4.07  
4.06  
4.05  
4.04  
4.03  
4.02  
4.00  
3.81  
3.79  
3.77  
3.75  
3.73  
3.71  
3.57  
3.53  
3.49

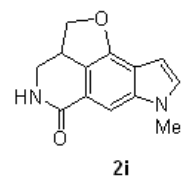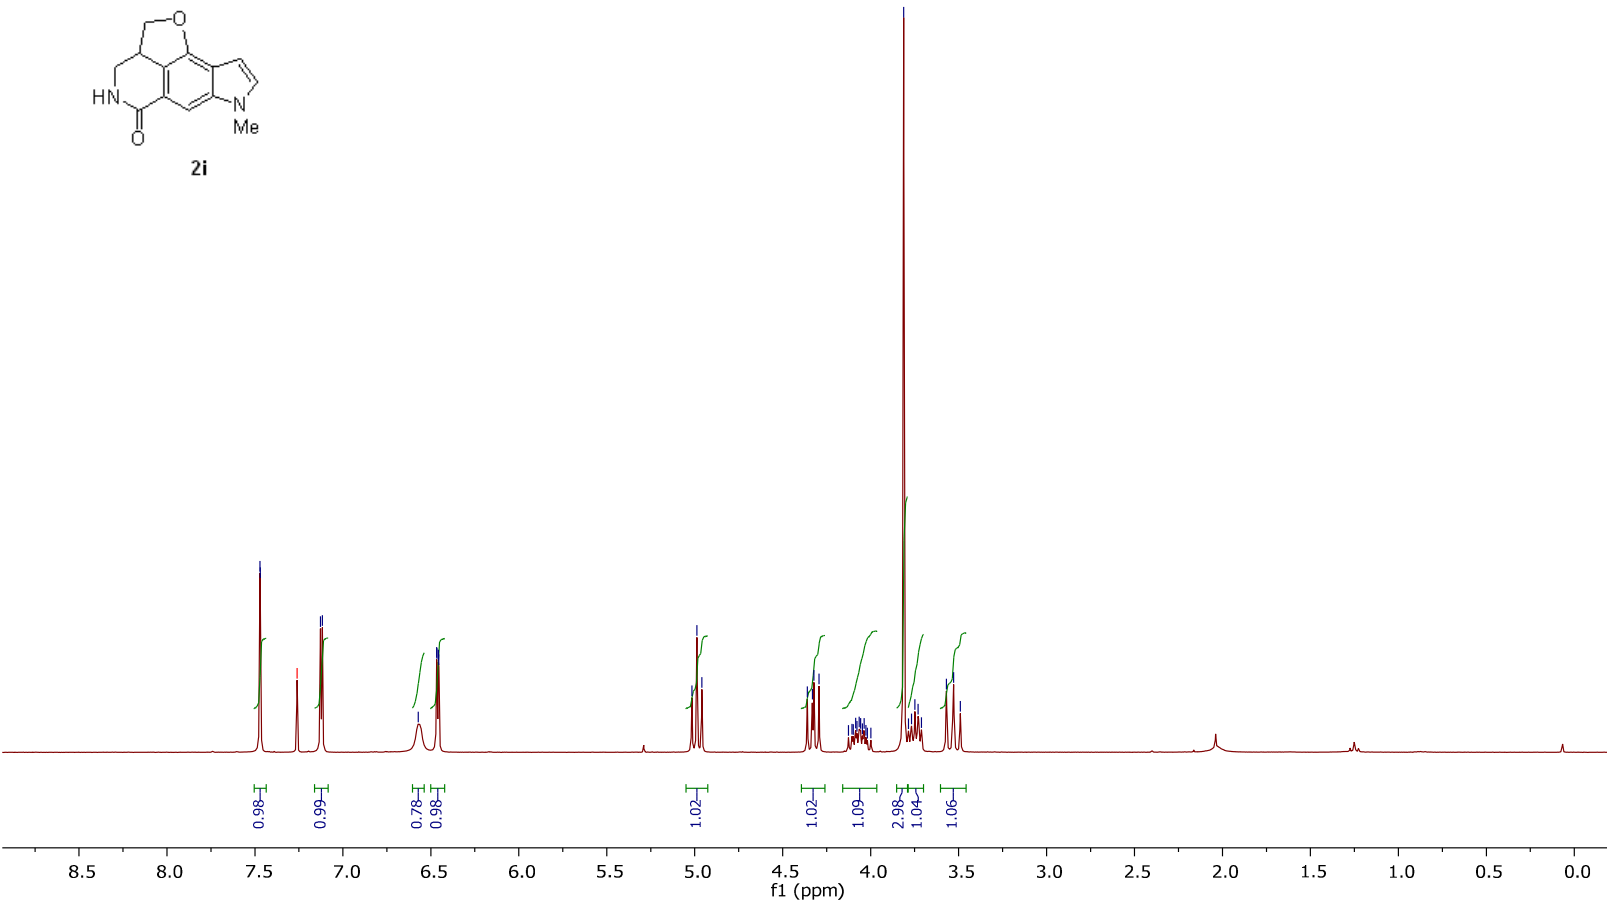

Aug14-2013.341.fid  
glo shi szz sf 073  
carbon\_256 CDCl3 /opt/topspin av1 27

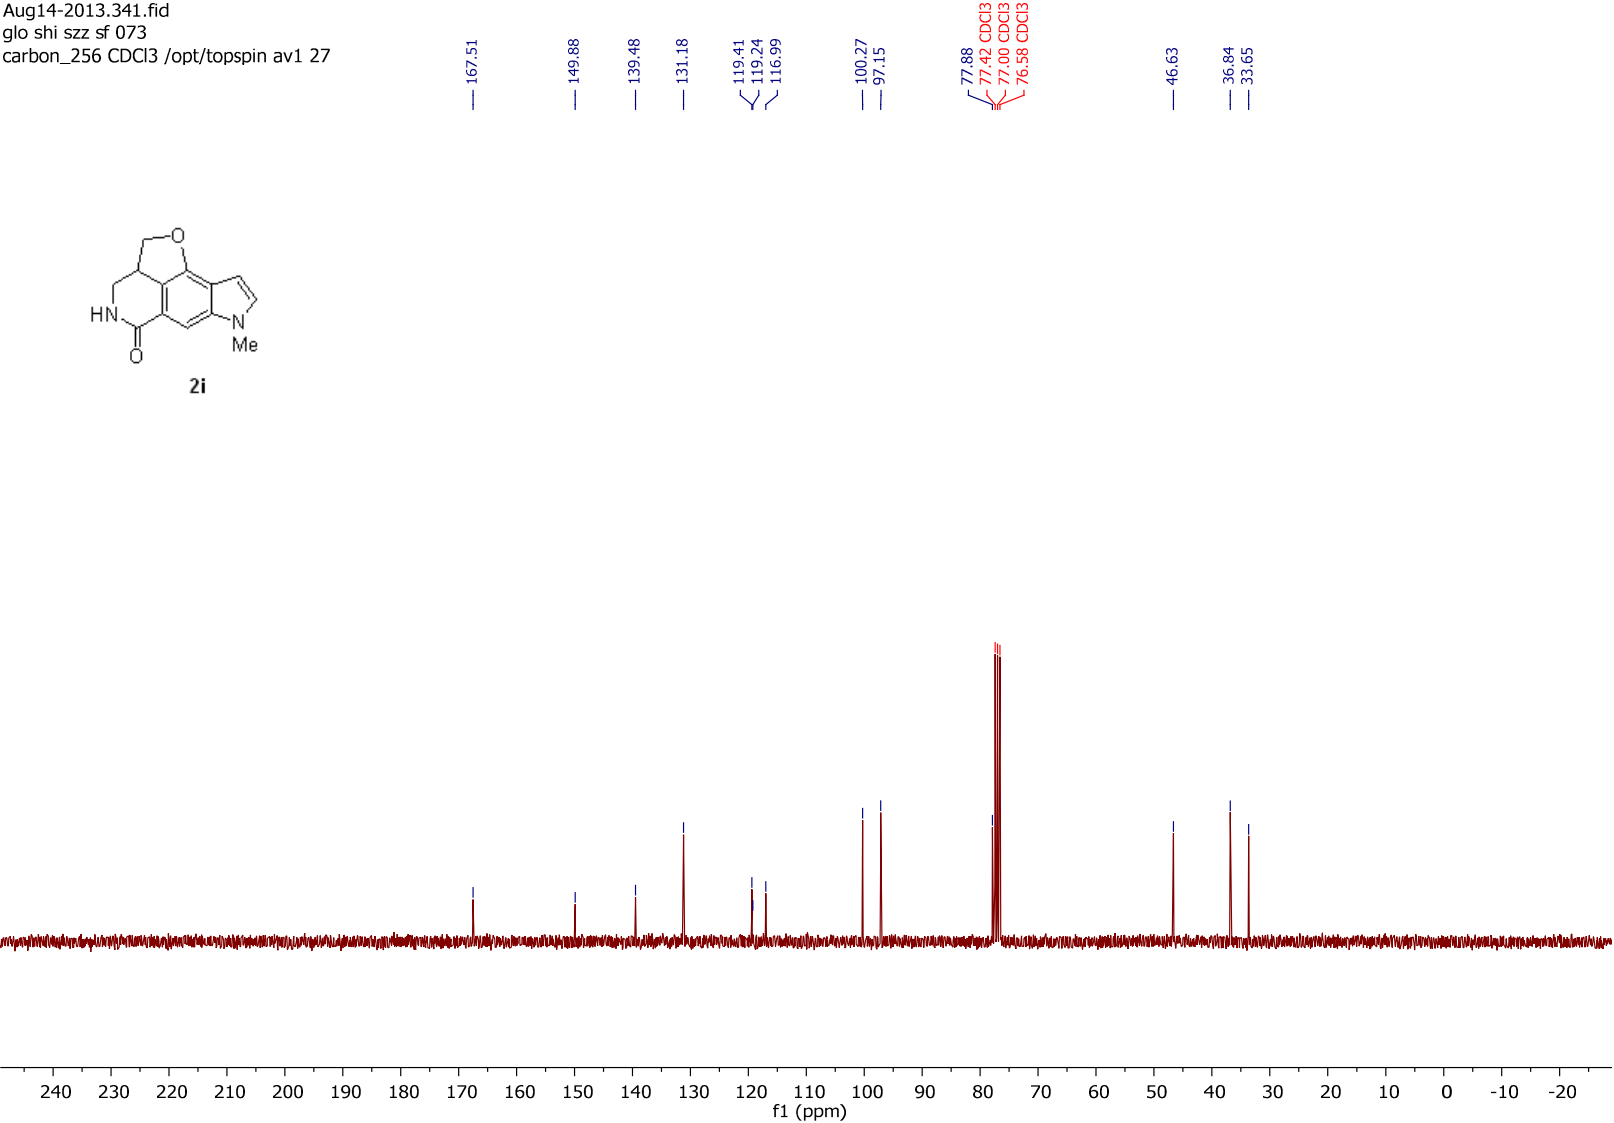

Oct09-2013.980.fid  
glo shi szz sf 093  
proton CDCl3 /opt/topspin av1 56

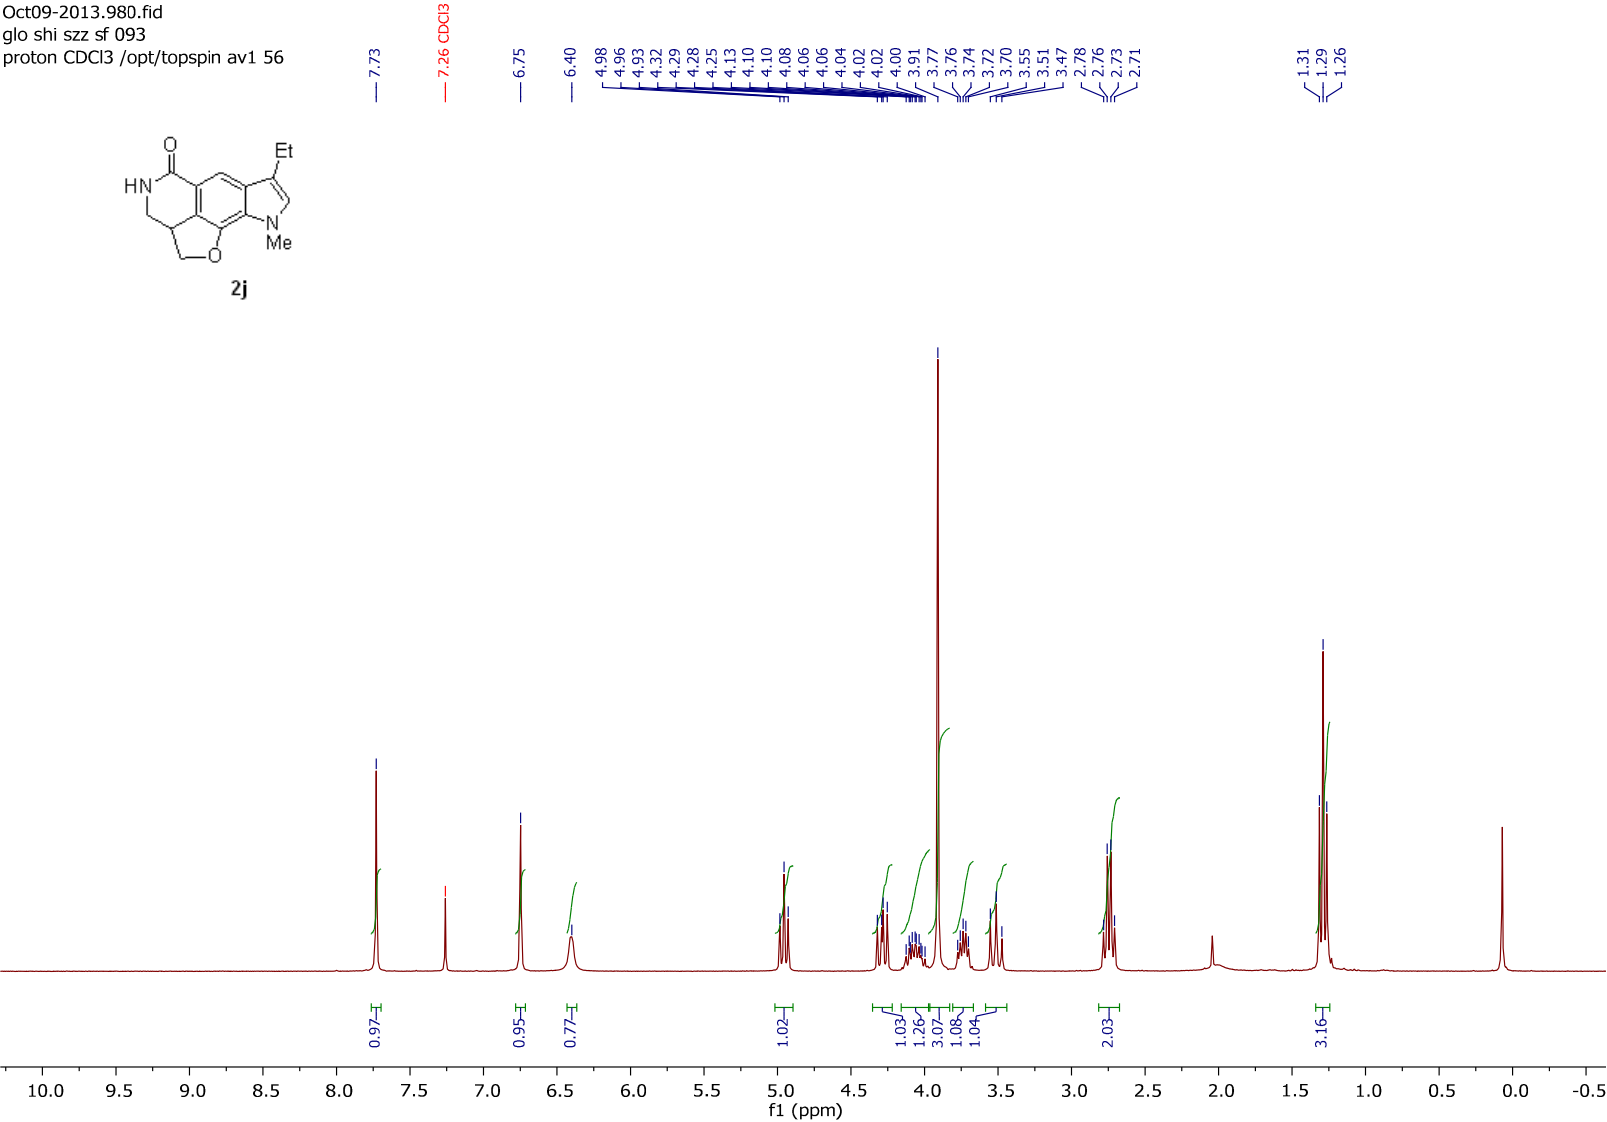

Oct09-2013.981.fid  
glo shi szz sf 093  
carbon\_256 CDCl3 /opt/topspin av1 56

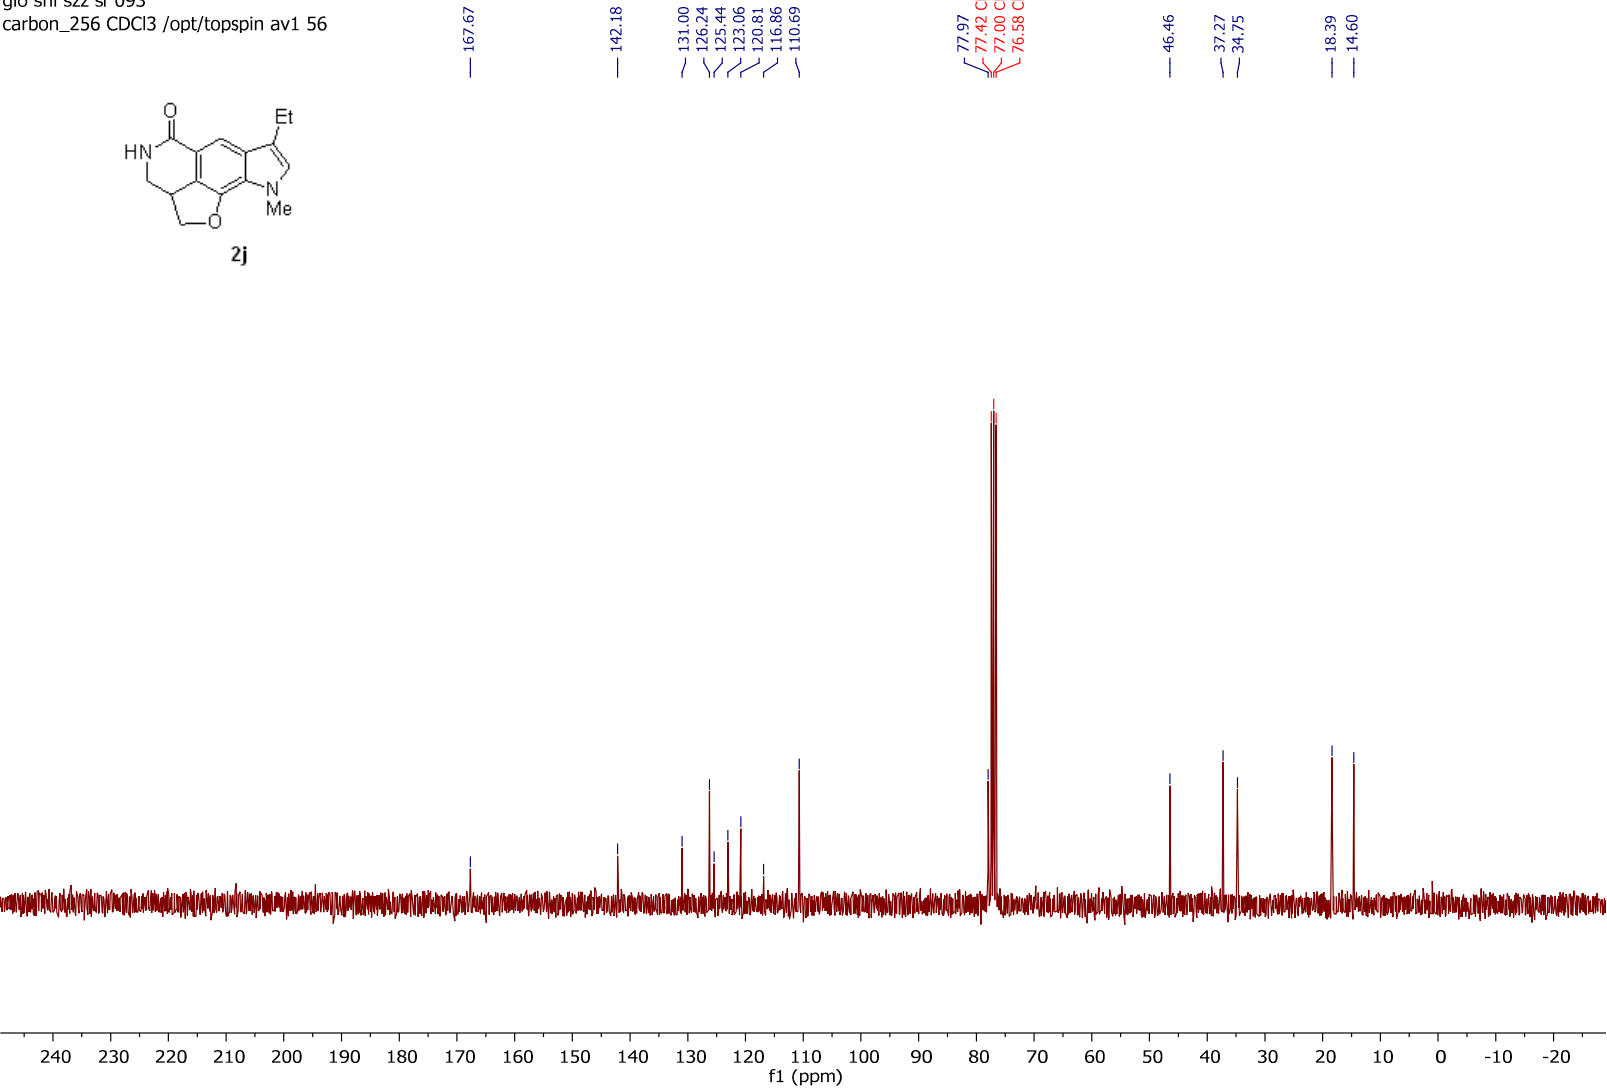

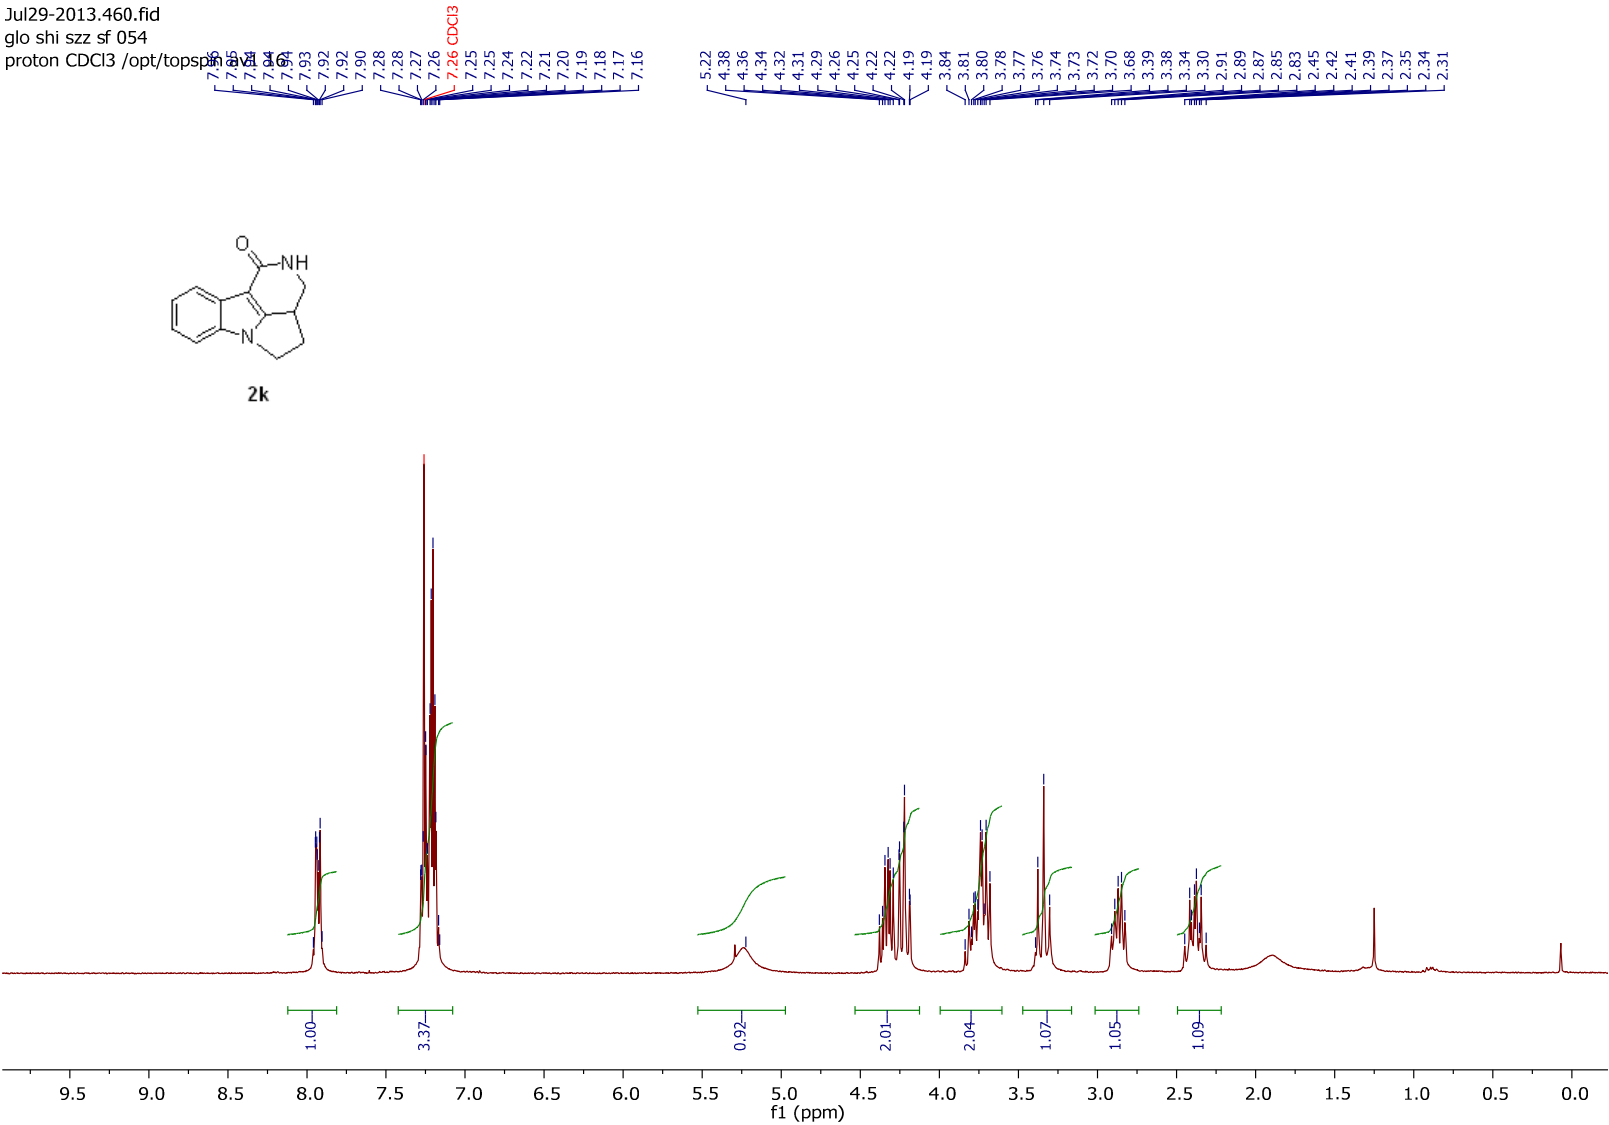

szz-sf-054\_300713\_299k\_13c  
szz-sf-054\_300713\_299k\_13c  
600 MHz, probe: autoX\_DB

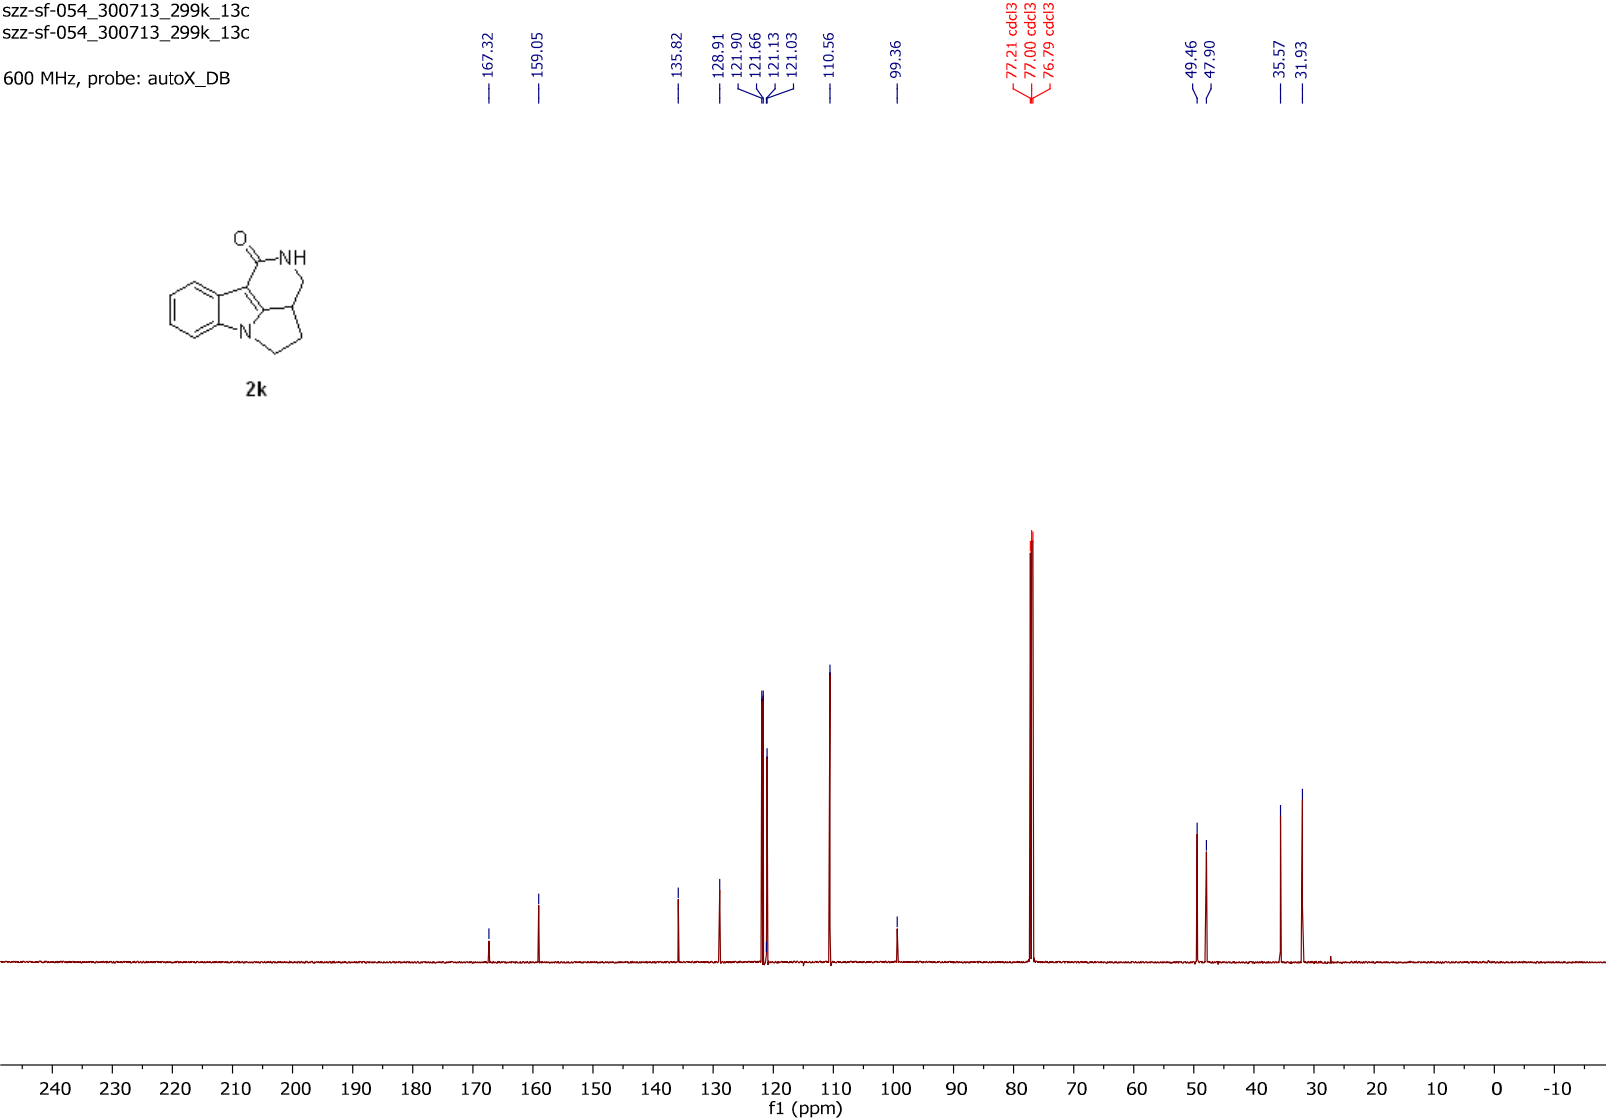

Aug01-2013.280.fid  
glo shi szz sf 067  
proton CDCl3 /opt/topspin av1 12

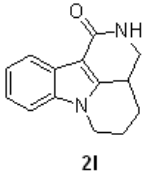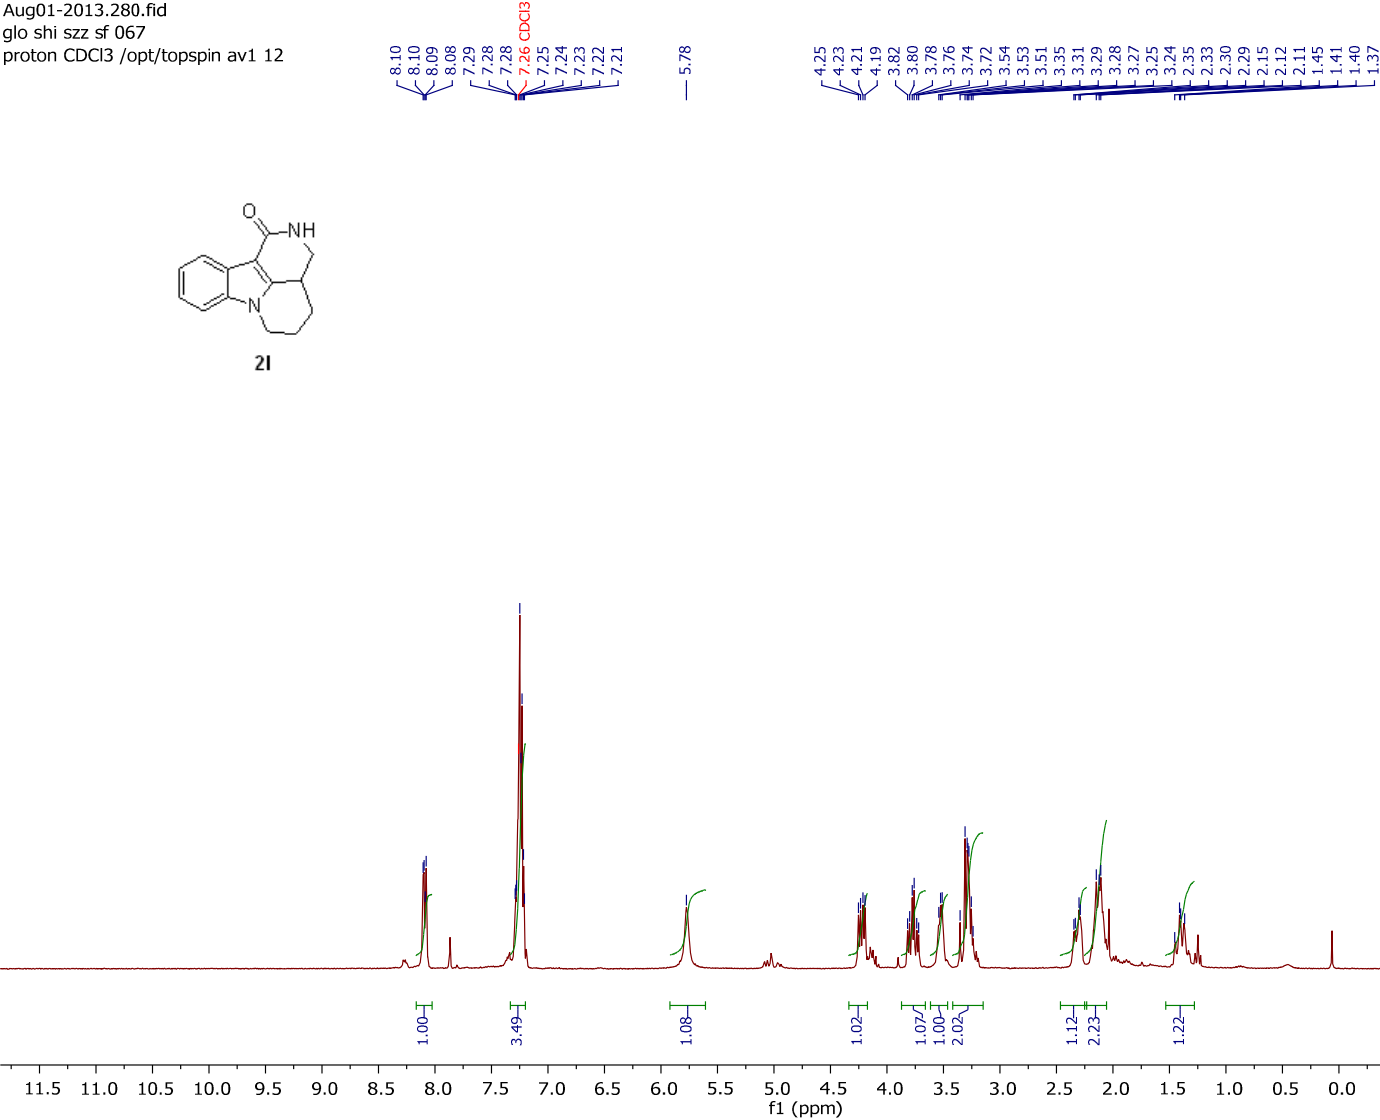



Aug01-2013.281.fid  
glo shi szz sf 067  
carbon CDCl3 /opt/topspin av1

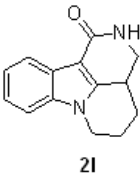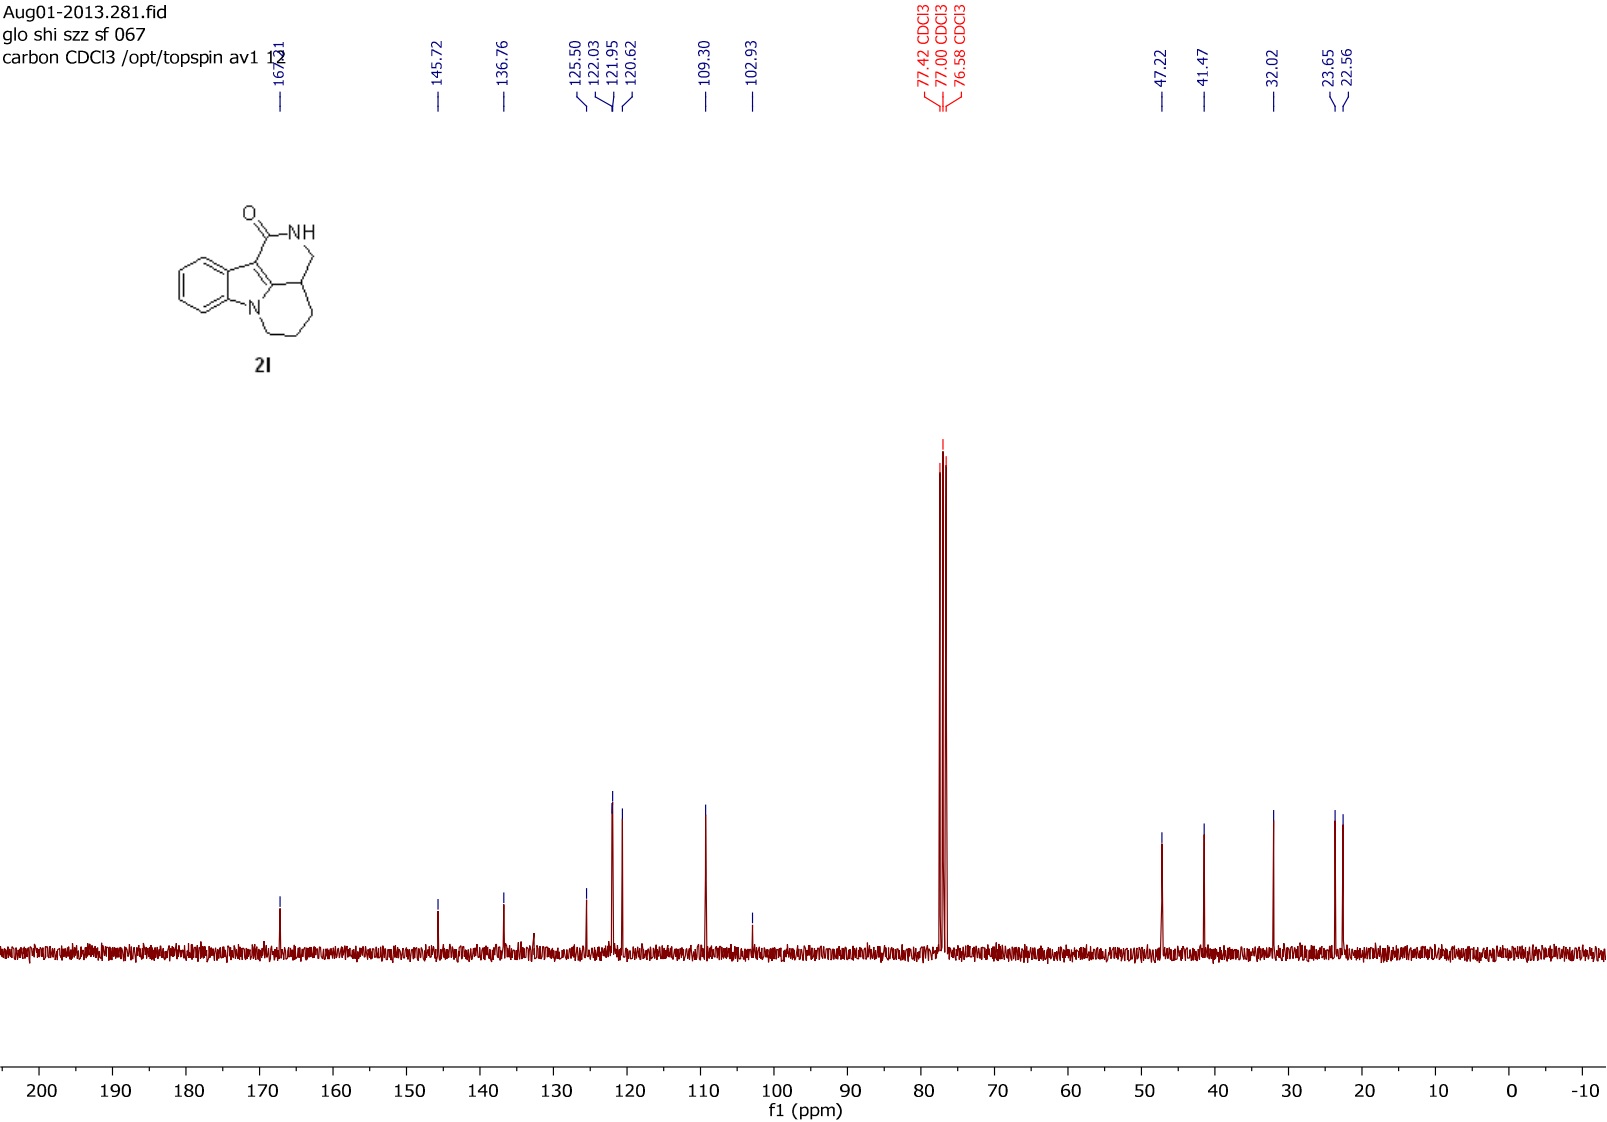

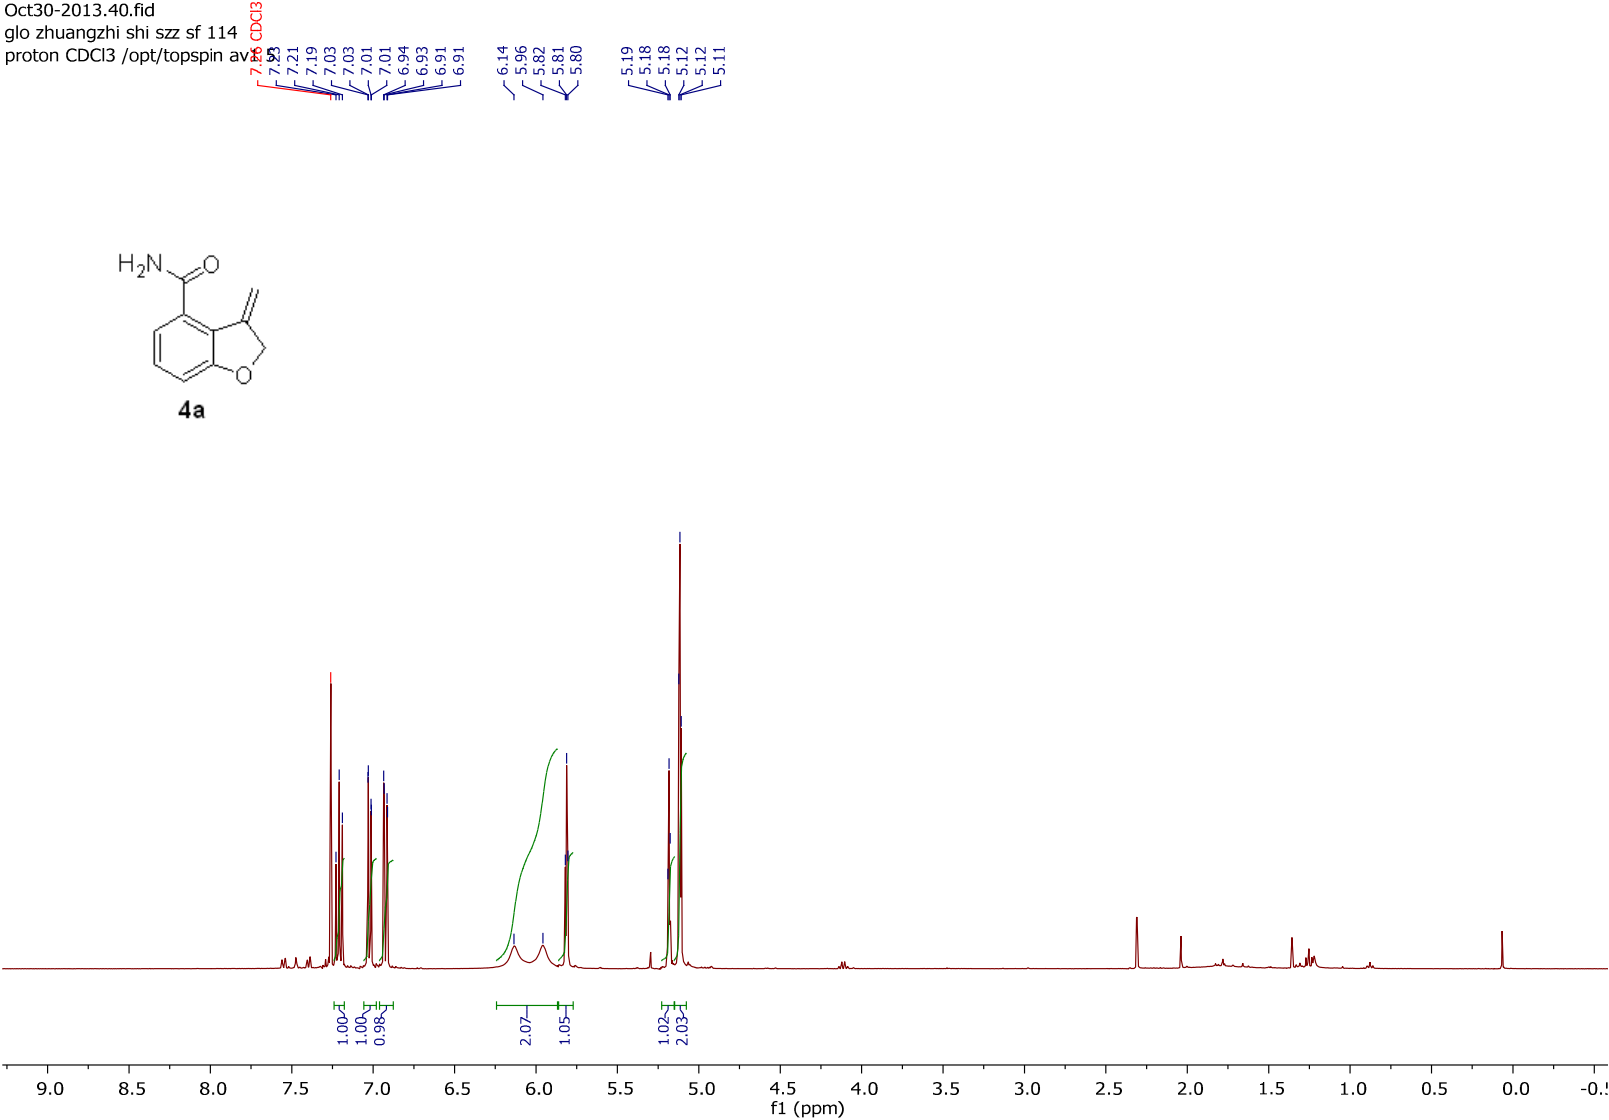

Oct30-2013.41.fid  
glo zhuangzhi shi szz sf 114  
carbon\_256 CDCl3 /opt/topspin/av4.5

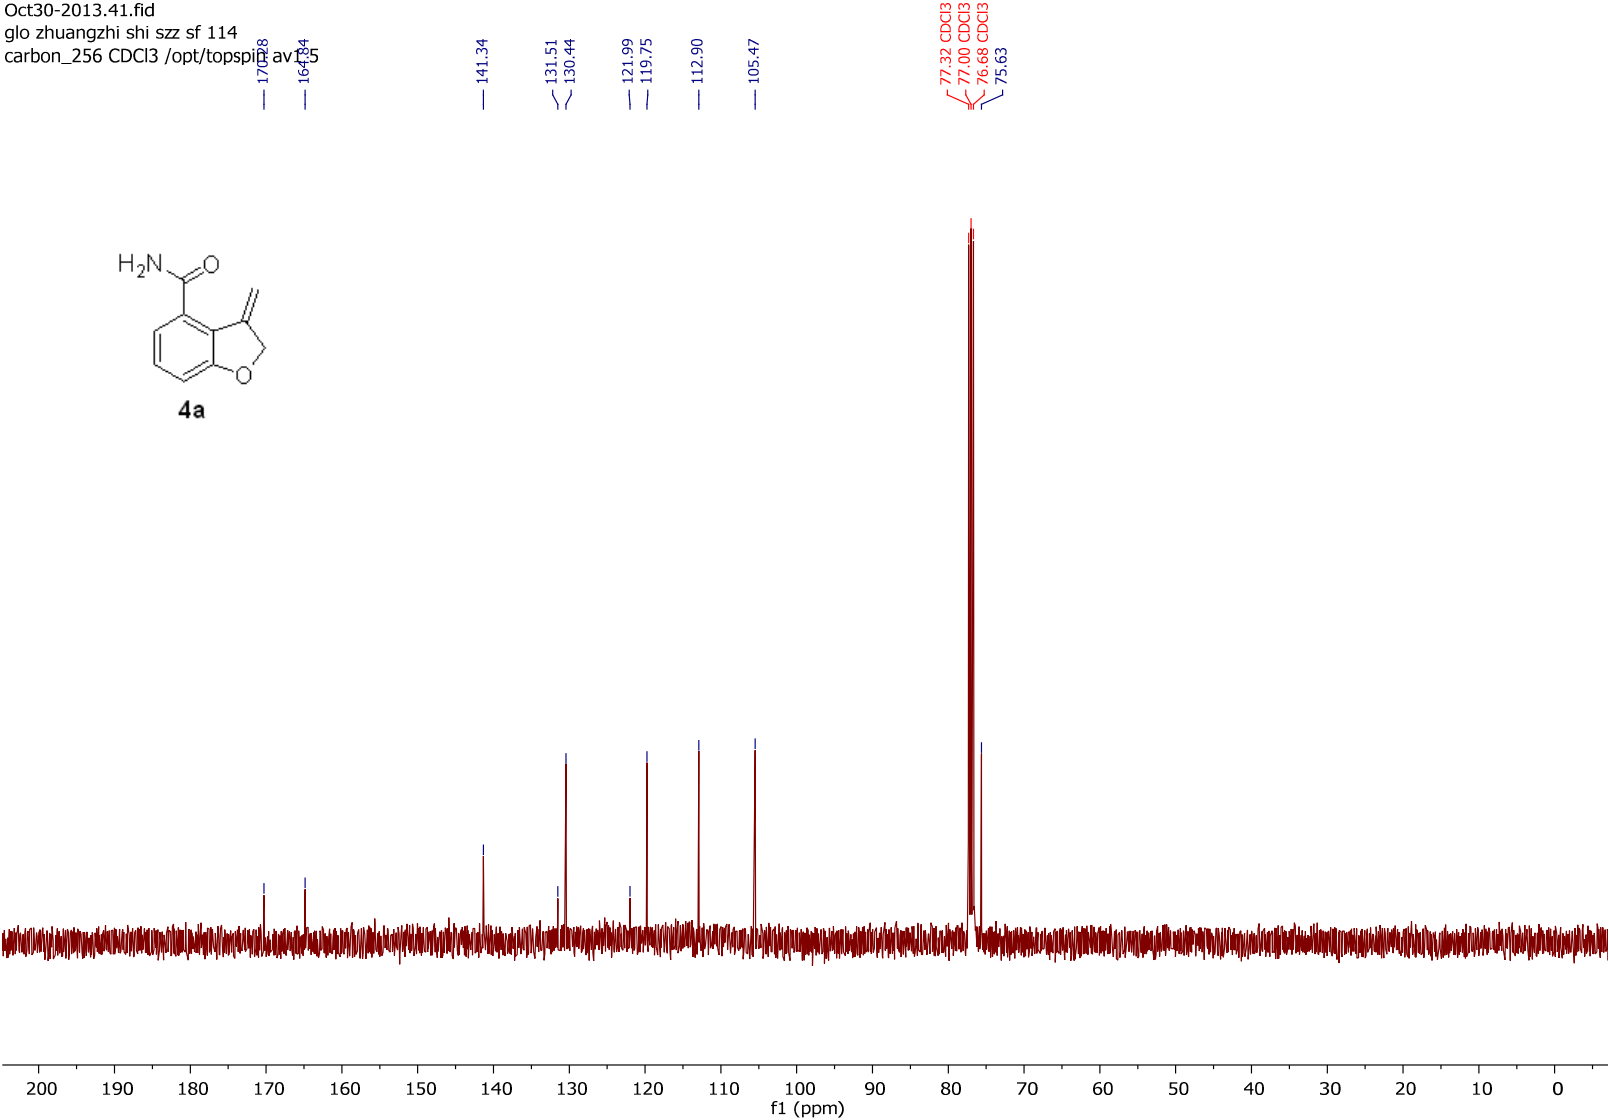

Nov22-2013.40.fid  
glo shi szz sf 142  
proton CDCl3 /opt/topspin av1 1

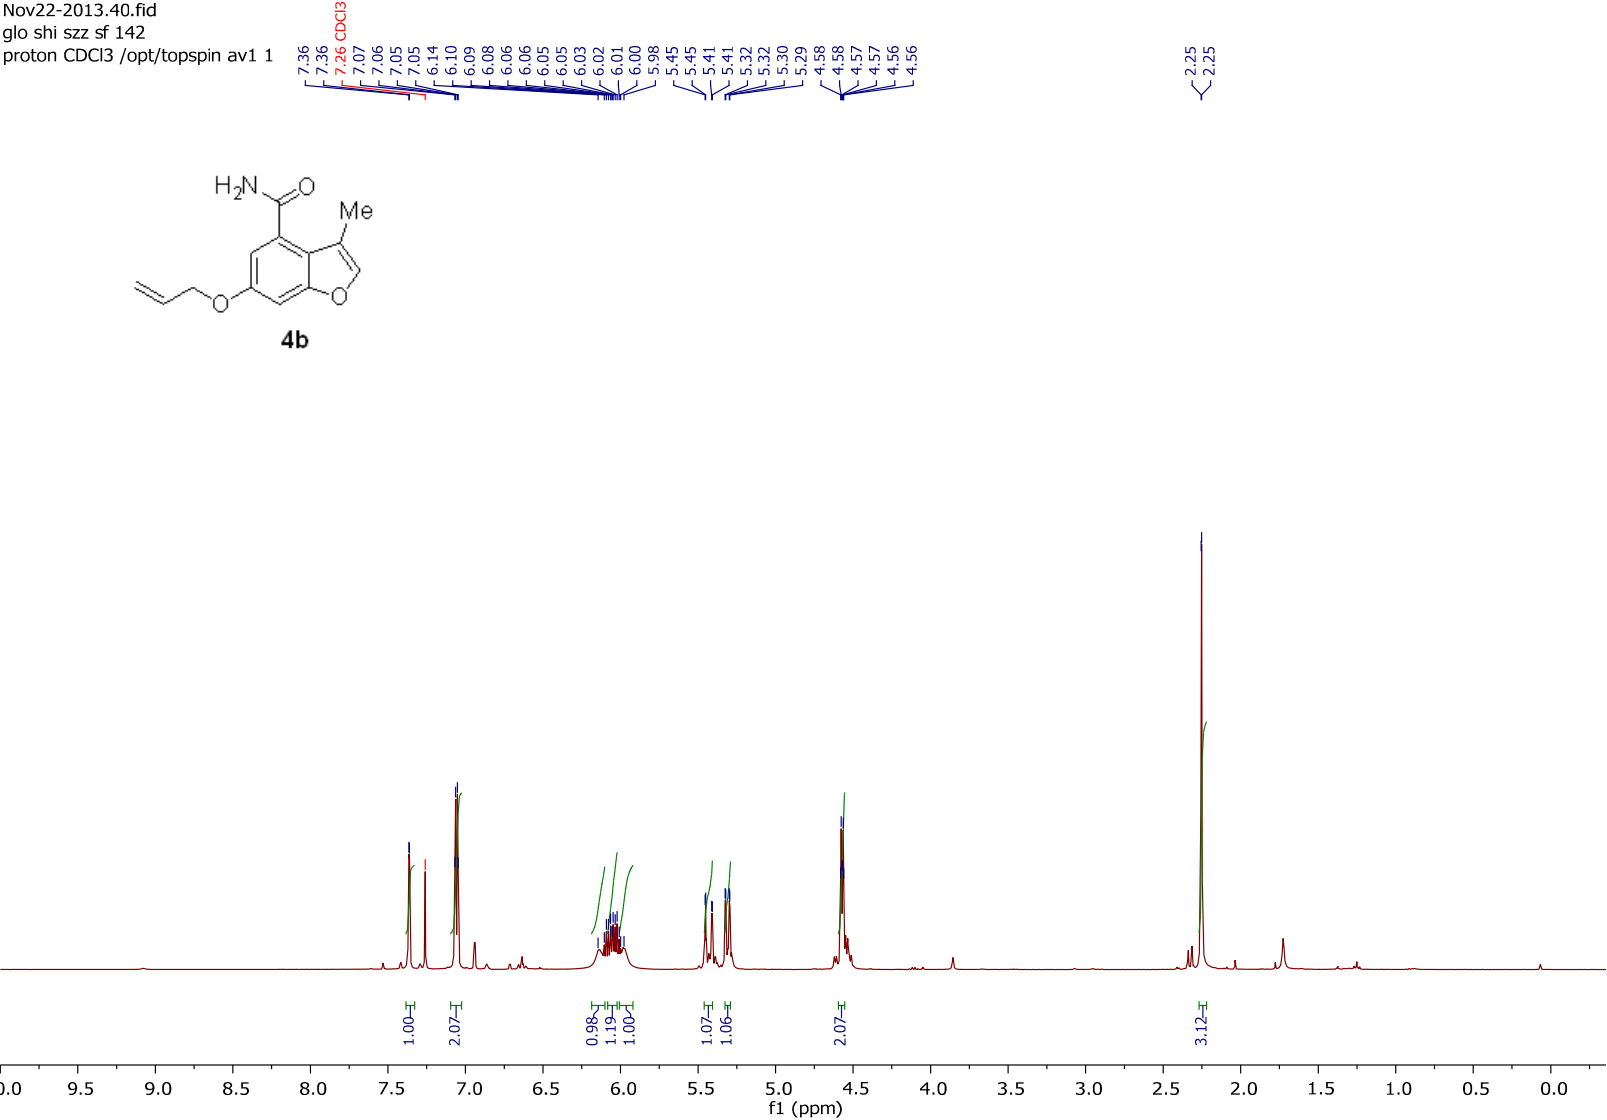

Nov22-2013.41.fid  
glo shi szz sf 142  
carbon CDCl3 /opt/topspin av1 1

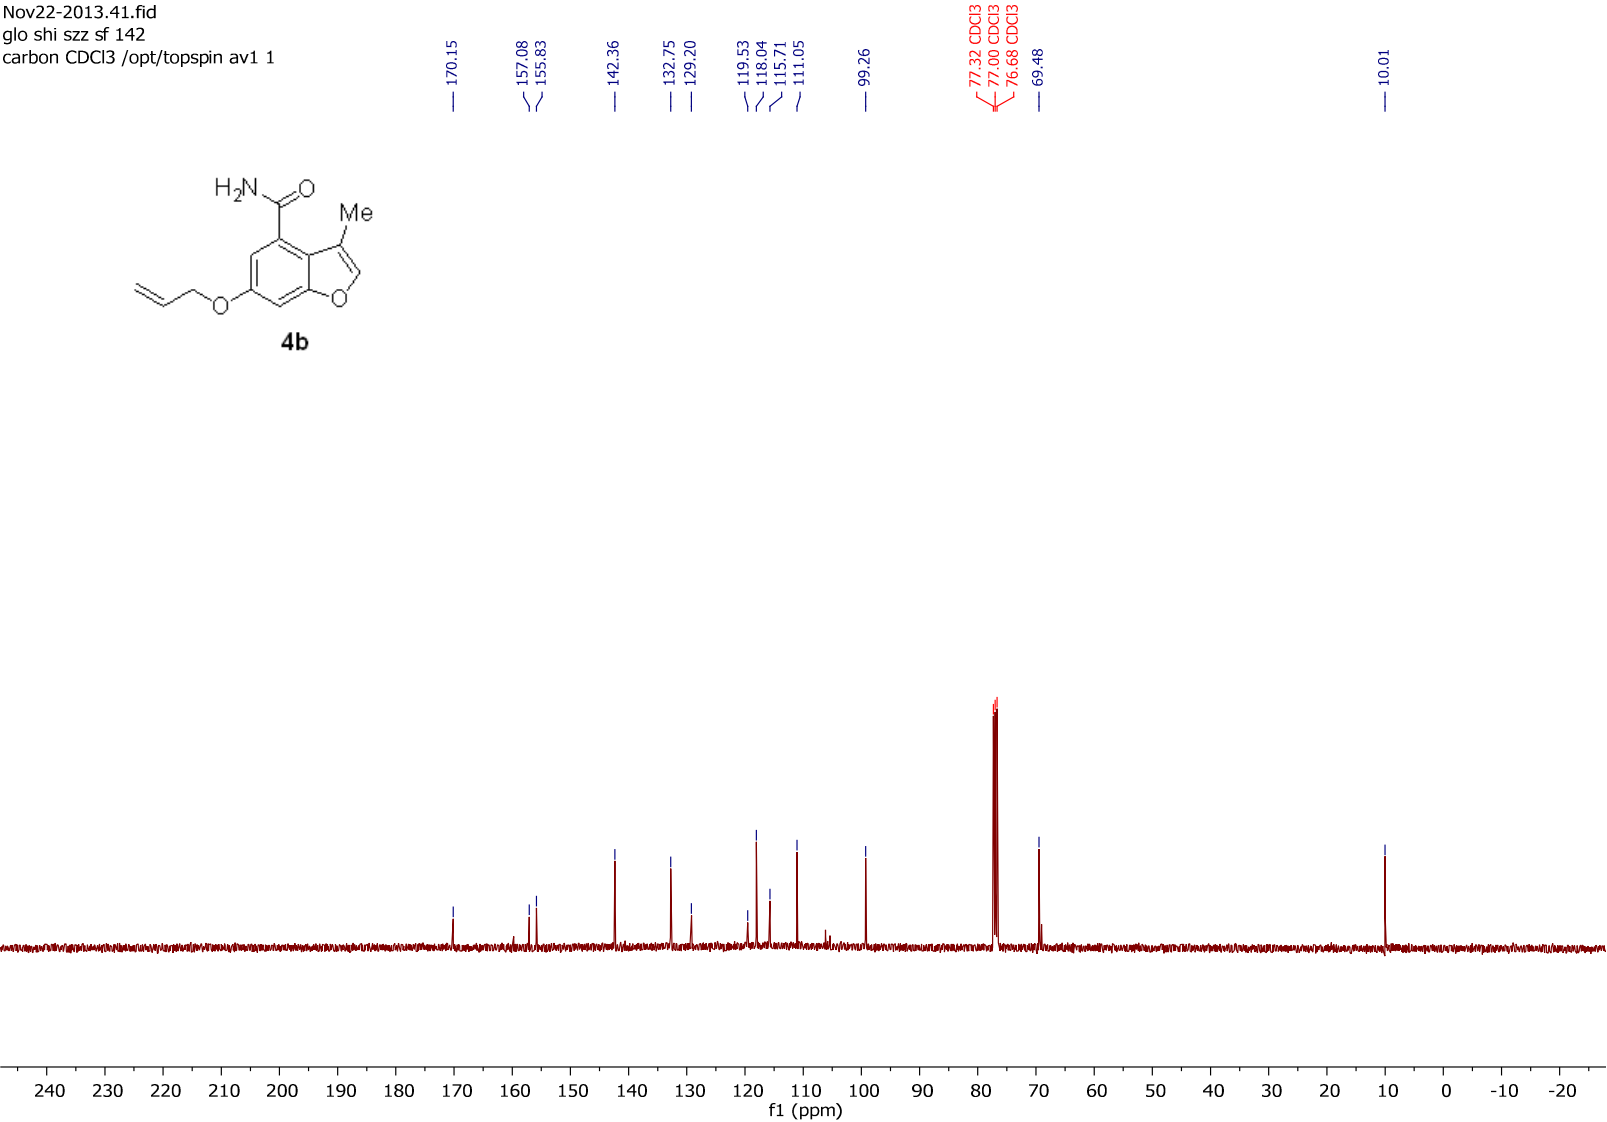

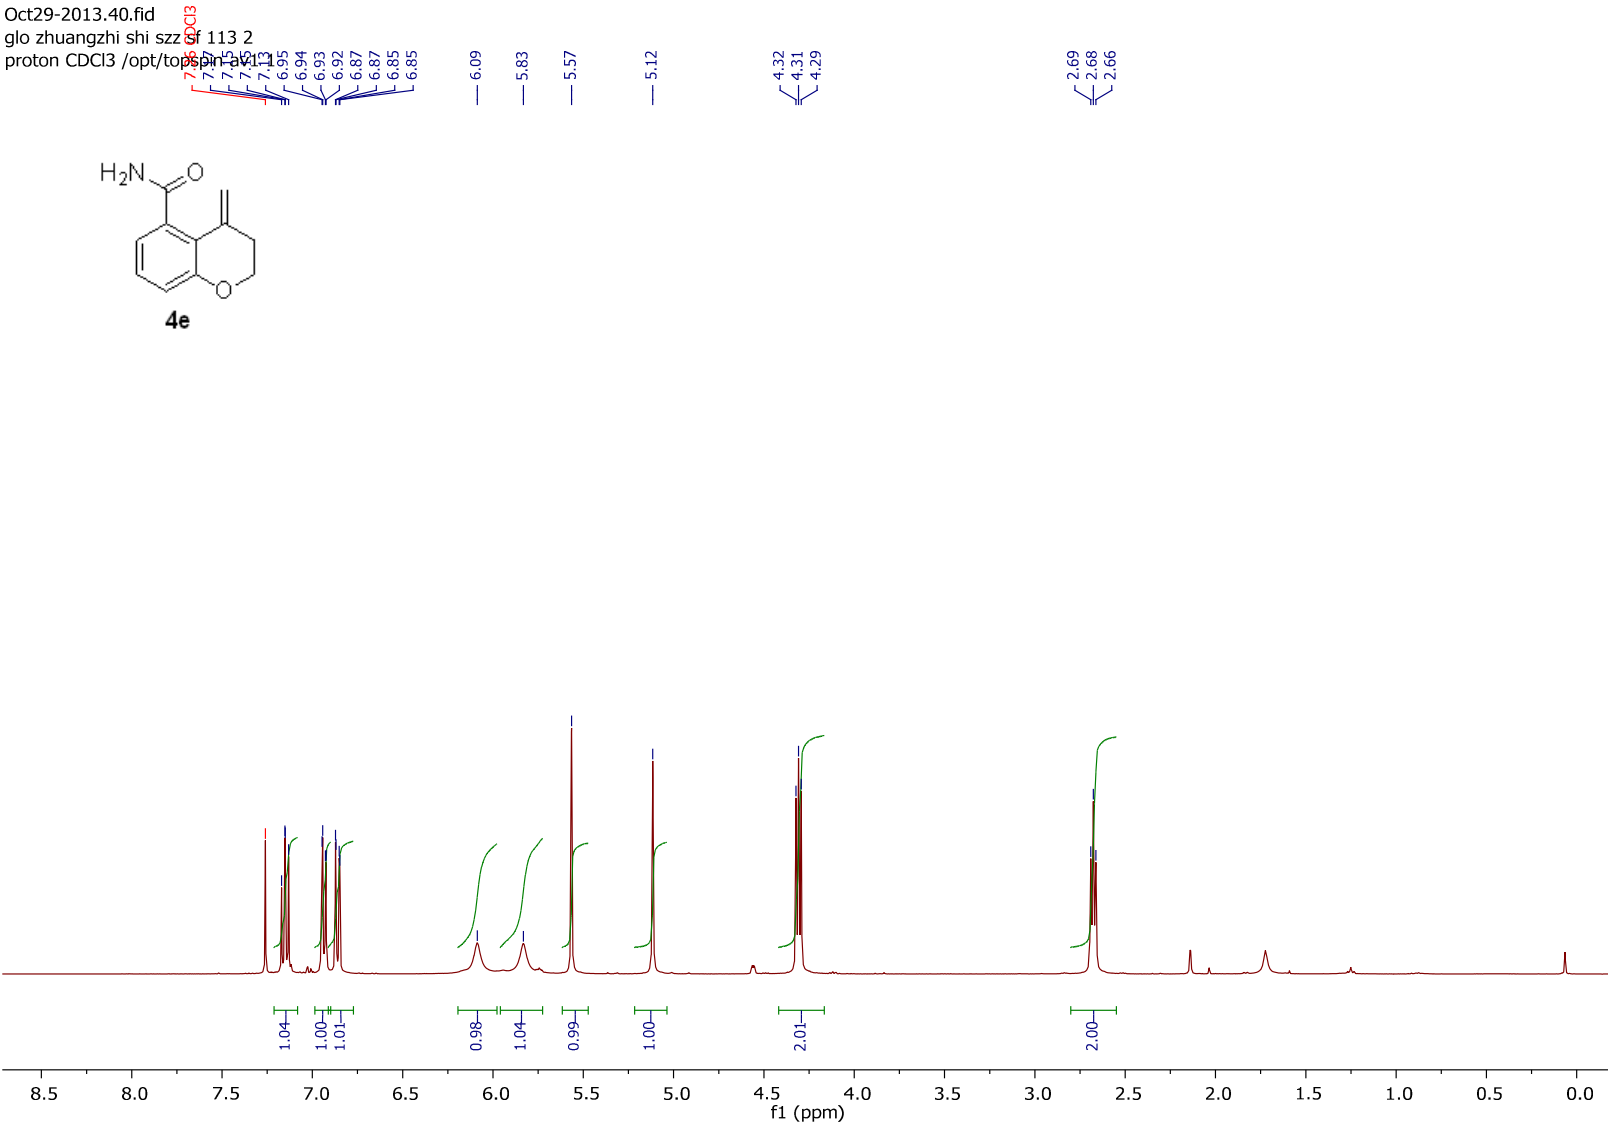

Oct29-2013.41.fid  
glo zhuangzhi shi szz sf 113 2  
carbon CDCl3 /opt/topspin av1 1

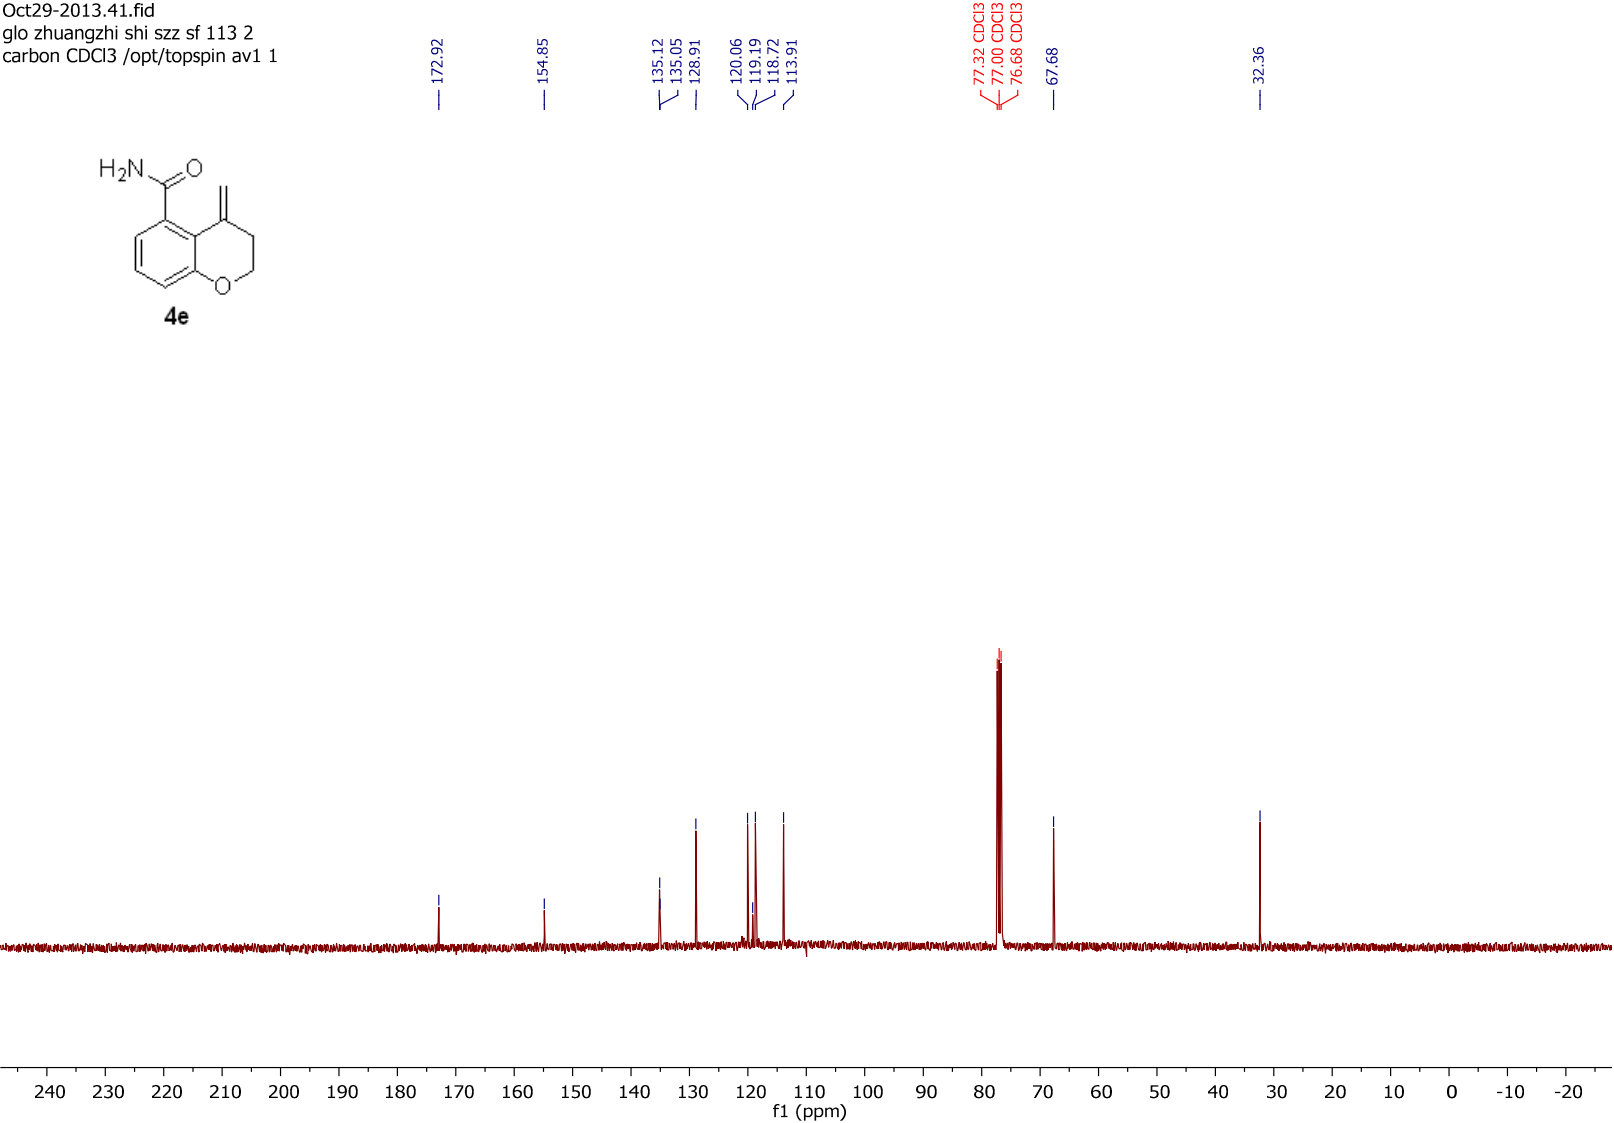

Oct25-2013.340.fid  
glo shi szz sf 103 1  
proton CDCl3 /opt/topspin av

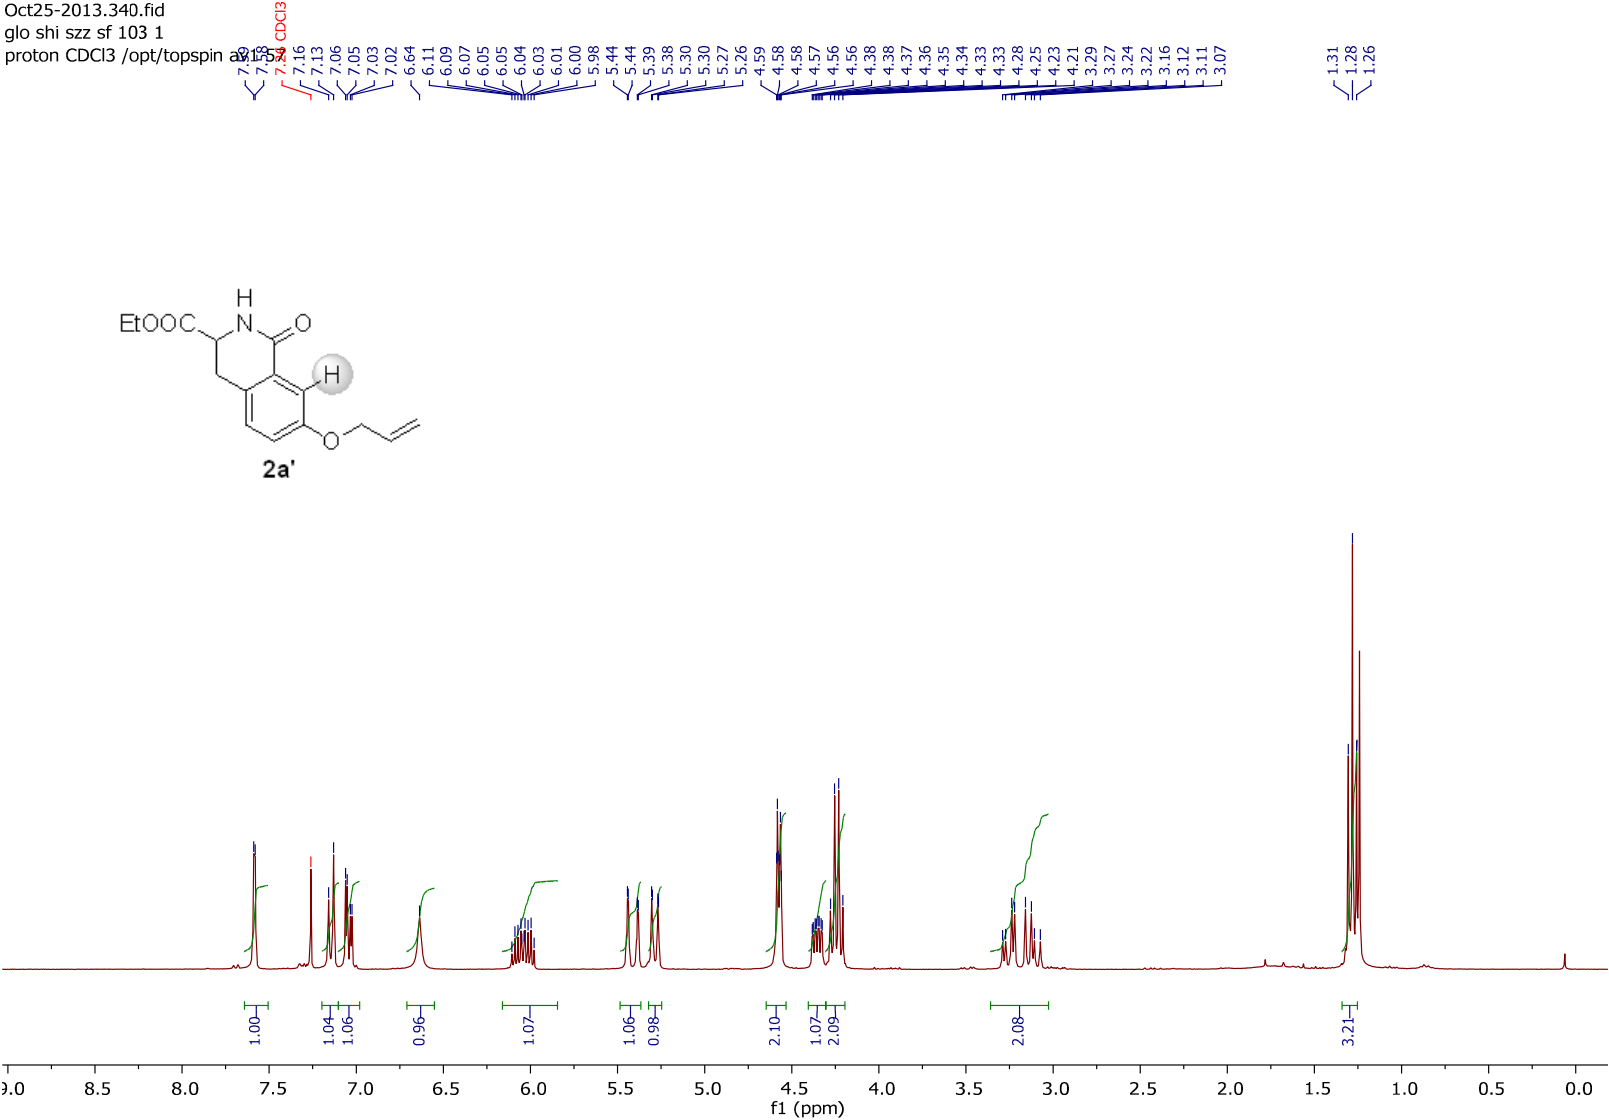



Oct25-2013.341.fid  
glo shi szz sf 103 1  
carbon CDCl3 /opt/topspin av1 57

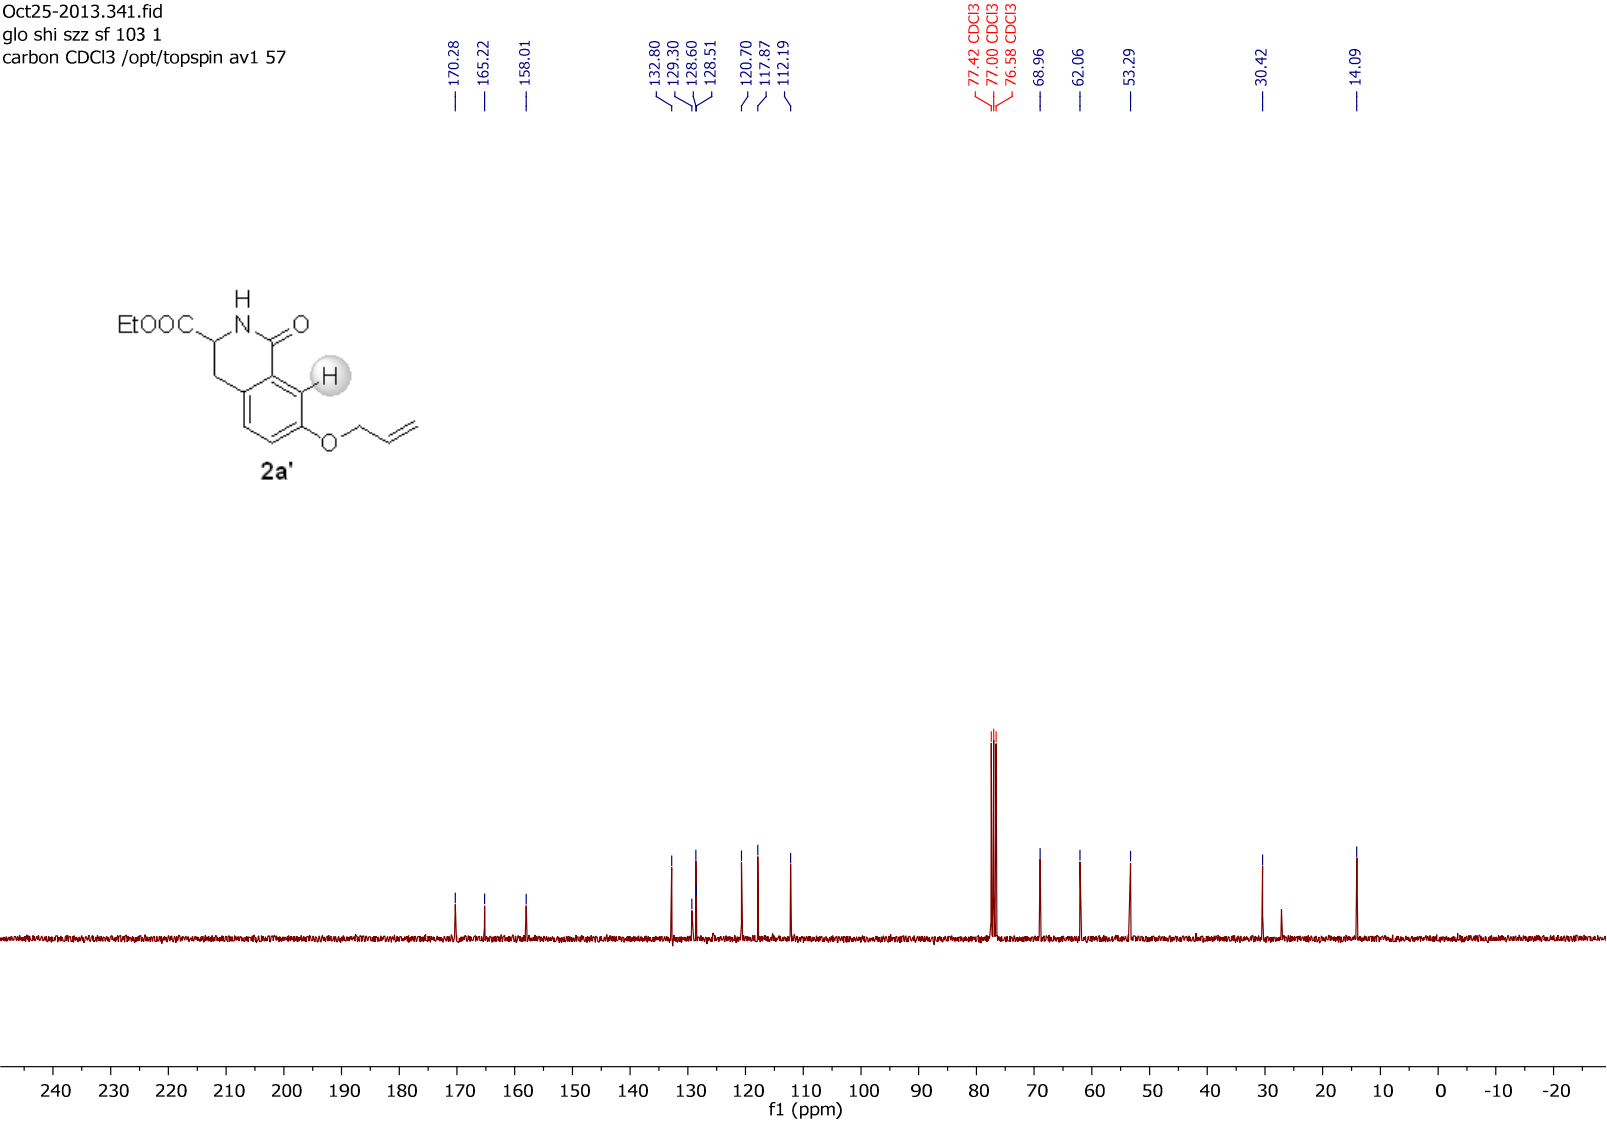

Supplement: c4cc00029c.pdf [file c4cc00029c.pdf]
